# Supplementary material for: Molecular electrostatic potential as a general and versatile indicator for electronic substituent effects: statistical analysis and applications
Source: Royal Society of Chemistry journal article supplement (doi:10.1039/d2cp03244a), 2022-01-01
Supplement: d2cp03244a1.xlsx [file d2cp03244a1.xlsx]

## Sheet: Included_FGs
Functional Groups	σ_m	σ_p	F	R
H	0	0	0	0
Me	-0.07	-0.17	0.01	-0.18
CH=CH2	0.06	-0.04	0.13	-0.17
Ph	0.06	-0.01	0.12	-0.13
OAc	0.39	0.31	0.42	-0.11
NHCOCH3	0.21	0	0.31	-0.31
OMe	0.12	-0.27	0.29	-0.56
OH	0.12	-0.37	0.33	-0.7
NH2	-0.16	-0.66	0.08	-0.74
F	0.34	0.06	0.45	-0.39
Cl	0.37	0.23	0.42	-0.19
Br	0.39	0.23	0.45	-0.22
CHO	0.35	0.42	0.33	0.09
COMe	0.38	0.5	0.33	0.17
COOMe	0.37	0.45	0.34	0.11
COOH	0.37	0.45	0.34	0.11
COCl	0.51	0.61	0.46	0.15
CF3	0.43	0.54	0.38	0.16
CN	0.56	0.66	0.51	0.15
NO2	0.71	0.78	0.65	0.13
NHMe	-0.21	-0.7	0.03	-0.73
NMe2	-0.16	-0.6	0	-0.6
CHF2	0.29	0.32	0.29	0.03
COF	0.55	0.7	0.48	0.22
SH	0.25	0.15	0.3	-0.15
NHNH2	-0.02	-0.55	0.22	-0.77
NO	0.62	0.91	0.49	0.42
CH2F	0.12	0.11	0.15	-0.04
CH2Cl	0.11	0.12	0.13	-0.01
CH2Br	0.12	0.14	0.14	0
CH2OH	0	0	0.03	-0.03
Et	-0.07	-0.15	0	-0.15
OEt	0.1	-0.24	0.26	-0.5
CCH	0.21	0.23	0.22	0.01
BF2	0.32	0.48	0.26	0.22
GeBr3	0.66	0.73	0.61	0.12
SiBr3	0.48	0.57	0.44	0.13
SO2Cl	1.2	1.11	1.16	-0.05
SCl	0.44	0.48	0.42	0.06
POCl2	0.78	0.9	0.7	0.2
PCl2	0.54	0.61	0.5	0.11
PSCl2	0.7	0.8	0.63	0.17
GeCl3	0.71	0.79	0.65	0.14
SiCl3	0.48	0.56	0.44	0.12
SOF	0.74	0.83	0.67	0.16
SO2F	0.8	0.91	0.72	0.19
POF2	0.81	0.89	0.74	0.15
PF2	0.49	0.59	0.44	0.15
GeF3	0.85	0.97	0.76	0.21
SF3	0.7	0.8	0.63	0.17
SiF3	0.54	0.69	0.47	0.22
PF4	0.63	0.8	0.54	0.26
SF5	0.61	0.68	0.56	0.12
ONO2	0.55	0.7	0.48	0.22
N3	0.37	0.08	0.48	-0.4
B(OH)2	-0.01	0.12	-0.03	0.15
NHOH	-0.04	-0.34	0.11	-0.45
SO2NH2	0.53	0.6	0.49	0.11
PH2	0.06	0.05	0.09	-0.04
GeH3	0	0.01	0.03	-0.02
SiH3	0.05	0.1	0.06	0.04
CBr3	0.28	0.29	0.28	0.01
CClF2	0.42	0.46	0.4	0.06
5-chloro-1-tetrazolyl	0.6	0.61	0.58	0.03
N=CCl2	0.21	0.13	0.26	-0.13
CCl3	0.4	0.46	0.38	0.09
OCCl3	0.43	0.35	0.46	-0.11
N=NCF3	0.56	0.68	0.5	0.18
OCF3	0.38	0.35	0.39	-0.04
SOCF3	0.63	0.69	0.58	0.11
SeOCF3	0.81	0.83	0.76	0.07
SO2CF3	0.83	0.96	0.74	0.22
SeO2CF3	1.08	1.21	0.97	0.24
OSO2CF3	0.56	0.53	0.56	-0.03
SCF3	0.4	0.5	0.36	0.14
SeCF3	0.44	0.45	0.43	0.02
NC	0.48	0.49	0.47	0.02
NCO	0.27	0.19	0.31	-0.12
OCN	0.67	0.54	0.69	-0.15
SO2CN	1.1	1.26	0.97	0.29
NCS	0.48	0.38	0.51	-0.13
SCN	0.51	0.52	0.49	0.03
SeCN	0.61	0.66	0.57	0.09
N=NCN	0.71	1.03	0.56	0.47
N(O)=NCN	0.78	0.89	0.7	0.19
C(NO2)3	0.72	0.82	0.65	0.17
CHBr2	0.31	0.32	0.31	0.01
CHCl2	0.31	0.32	0.31	0.01
OCHCl2	0.38	0.26	0.43	-0.17
OCHF2	0.31	0.18	0.37	-0.19
SOCHF2	0.54	0.58	0.51	0.07
SO2CHF2	0.75	0.86	0.67	0.19
SCHF2	0.33	0.37	0.32	0.05
S(O)(=NH)CF3	0.72	0.84	0.64	0.2
NHSO2CF3	0.44	0.39	0.45	-0.06
NHCN	0.21	0.06	0.28	-0.22
1-(1H)-tetrazolyl	0.52	0.5	0.52	-0.02
5-(1H)-tetrazolyl	0.64	0.56	0.65	-0.09
5-hydroxy-1-tetrazolyl	0.39	0.33	0.41	-0.08
OCH2Cl	0.25	0.08	0.33	-0.25
OCH2F	0.2	0.02	0.29	-0.27
SCH2F	0.23	0.2	0.25	-0.05
NHCHO	0.19	0	0.28	-0.28
CONH2	0.28	0.36	0.26	0.1
CSNH2	0.25	0.3	0.24	0.06
CH=NOH	0.22	0.1	0.28	-0.18
N(O)=NCONH2	0.59	0.63	0.56	0.07
CH2SO2Me	0.15	0.17	0.16	0.01
SiMeCl2	0.31	0.39	0.29	0.1
SiMeF2	0.29	0.23	0.32	-0.09
NHCONH2	-0.03	-0.24	0.09	-0.33
N(Me)NO2	0.49	0.61	0.43	0.18
NHCSNH2	0.22	0.16	0.26	-0.1
SOMe	0.52	0.49	0.52	-0.03
S(OMe)	0.21	0.17	0.24	-0.07
OS(=O)Me	0.44	0.45	0.43	0.02
S(O)OMe	0.5	0.54	0.47	0.07
SO2Me	0.6	0.72	0.53	0.19
SSO2Me	0.43	0.54	0.38	0.16
OSO2Me	0.39	0.36	0.4	-0.04
SMe	0.15	0	0.23	-0.23
SSMe	0.22	0.13	0.27	-0.14
SeMe	0.1	0	0.16	-0.16
CH2NH2	-0.03	-0.11	0.04	-0.15
NHSO2Me	0.2	0.03	0.28	-0.25
N(COF)2	0.58	0.57	0.57	0
COCF3	0.63	0.8	0.54	0.26
SCOCF3	0.48	0.46	0.48	-0.02
OCOCF3	0.56	0.46	0.58	-0.12
N(CF3)C=O(F)	0.5	0.5	0.49	0.01
CF2CF3	0.47	0.52	0.44	0.08
OCF2CF3	0.48	0.28	0.55	-0.27
SO2CF2CF3	0.92	1.08	0.81	0.27
SCF2CF3	0.44	0.48	0.42	0.06
N(CF3)2	0.4	0.53	0.35	0.18
S(CF3)=NSO2CF3	1.18	1.28	1.07	0.21
SO(CF3)=NSO2CF3	1.23	1.4	1.09	0.31
N(SO2CF3)2	0.61	0.83	0.5	0.33
P(CF3)2	0.6	0.69	0.55	0.14
P(CN)2	0.82	0.9	0.75	0.15
OCF2CHFCl	0.35	0.28	0.38	-0.1
NHCOCF3	0.3	0.12	0.38	-0.26
CH=NSO2CF3	0.76	1	0.63	0.37
OCF2CHF2	0.34	0.25	0.38	-0.13
SCF2CHF2	0.38	0.47	0.35	0.12
C2N8S2H	0.63	0.64	0.6	0.04
SC≡CH	0.26	0.19	0.3	-0.11
SCH=CHCl	0.31	0.24	0.34	-0.1
SeCH=CHCl	0.28	0.26	0.3	-0.04
CH2CF3	0.12	0.09	0.15	-0.06
CH2SOCF3	0.25	0.24	0.27	-0.03
CH2SO2CF3	0.29	0.31	0.29	0.02
CH2SCF3	0.12	0.15	0.13	0.02
CH2CN	0.16	0.18	0.17	0.01
NHCOCH2Cl	0.17	-0.03	0.27	-0.3
N(Me)SO2CF3	0.46	0.44	0.46	-0.02
C(Me)(NO2)2	0.54	0.61	0.5	0.11
oxiranyl	0.05	0.03	0.09	-0.06
OCH=CH2	0.21	-0.09	0.34	-0.43
SCOMe	0.39	0.44	0.37	0.07
2-thiacylopropyl	0.04	0.01	0.08	-0.07
SCH=CH2	0.26	0.2	0.29	-0.09
SeCH=CH2	0.26	0.21	0.29	-0.08
1-aziridinyl	-0.07	-0.22	0.03	-0.25
2-aziridinyl	-0.06	-0.1	-0.01	-0.09
N-methyl-3-oxaziridinyl	0.09	0.12	0.1	0.02
NHCOOMe	-0.02	-0.17	0.07	-0.24
CONHMe	0.35	0.36	0.35	0.01
CH=NOMe	0.37	0.3	0.4	-0.1
CH2CONH2	0.06	0.07	0.08	-0.01
NHCSMe	0.24	0.12	0.3	-0.18
CSNHMe	0.3	0.34	0.29	0.05
CH=NNHCONHNH2	0.22	0.16	0.26	-0.1
CH(OH)Me	0.08	-0.07	0.16	-0.23
CH2OMe	0.08	0.01	0.13	-0.12
SO2Et	0.66	0.77	0.59	0.18
SEt	0.18	0.03	0.26	-0.23
P(Cl)NMe2	0.38	0.56	0.31	0.25
SiClMe2	0.16	0.21	0.16	0.05
SiFMe2	0.12	0.17	0.12	0.05
NHEt	-0.24	-0.61	-0.04	-0.57
N(Me)SO2Me	0.21	0.24	0.21	0.03
SO2NMe2	0.51	0.65	0.44	0.21
N(SO2Me)2	0.47	0.49	0.45	0.04
SN(Me)2	0.12	0.09	0.15	-0.06
N=NNMe2	-0.05	-0.03	-0.02	-0.01
P(O)Me2	0.43	0.5	0.4	0.1
PO(OMe)2	0.42	0.53	0.37	0.16
PMe2	0.03	0.06	0.05	0.01
SiH(Me)2	0.01	0.04	0.03	0.01
CCCF3	0.41	0.51	0.37	0.14
CF=CFCF3	0.39	0.46	0.36	0.1
N=C(CF3)2	0.29	0.23	0.32	-0.09
CF2CF2CF3	0.44	0.48	0.42	0.06
CF(CF3)2	0.37	0.53	0.31	0.22
SO2CF2CF2CF3	0.92	1.09	0.81	0.28
SO2CF(CF3)2	0.92	1.1	0.8	0.3
SCF2CF2CF3	0.45	0.48	0.43	0.05
SCF(CF3)2	0.48	0.51	0.46	0.03
C(OH)(CF3)2	0.29	0.3	0.29	0.01
CH(SCF3)2	0.44	0.44	0.43	0.01
CH(CN)2	0.53	0.52	0.52	0
CH=CHCF3-c	0.16	0.17	0.18	-0.01
CH=CHCF3-t	0.24	0.27	0.24	0.03
CCMe	0.21	0.03	0.29	-0.26
N(Me)COCF3	0.41	0.39	0.41	-0.02
cyclopropyl	-0.07	-0.21	0.02	-0.23
C(Me)=CH2	0.09	0.05	0.13	-0.08
CH=CHMe	0.02	-0.09	0.09	-0.18
CH2CH=CH2	-0.11	-0.14	-0.06	-0.08
C(Et)(NO2)2	0.56	0.64	0.51	0.13
OCH2CH=CH2	0.09	-0.25	0.25	-0.5
COEt	0.38	0.48	0.34	0.14
COOEt	0.37	0.45	0.34	0.11
CH2OCOMe	0.04	0.05	0.07	-0.02
CH2CH2COOH	-0.03	-0.07	0.02	-0.09
SCH2CH=CH2	0.19	0.12	0.23	-0.11
SeCH2CH=CH2	0.21	0.12	0.26	-0.14
CH2NHCOMe	0.05	-0.05	0.12	-0.17
NHCOOEt	0.11	-0.15	0.23	-0.38
C(NO2)Me2	0.18	0.2	0.19	0.01
isopropyl	-0.04	-0.15	0.04	-0.19
Pr	-0.06	-0.13	0.01	-0.14
NHCONHEt	0.04	-0.26	0.19	-0.45
NHCSNHEt	0.3	0.07	0.4	-0.33
OCHMe2	0.1	-0.45	0.34	-0.79
OPr	0.1	-0.25	0.26	-0.51
CH2CH(OH)Me	-0.12	-0.17	-0.06	-0.11
C(OOH)Me2	0.06	-0.14	0.17	-0.31
SCHMe2	0.23	0.07	0.3	-0.23
CH2NMe2	0	0.01	0.03	-0.02
GeMe3	0	0	0.03	-0.03
Si(Me)2OMe	0.04	-0.02	0.09	-0.11
OSiMe3	0.13	-0.27	0.31	-0.58
SiMe(OMe)2	0.04	0.1	0.05	0.05
Si(OMe)3	0.09	0.13	0.1	0.03
SiMe3	-0.04	-0.07	0.01	-0.08
cyclo-C4F7	0.48	0.53	0.45	0.08
COCF2CF2CF3	0.63	0.79	0.55	0.24
C(CF3)3	0.55	0.55	0.53	0.02
(CF2)3CF3	0.47	0.52	0.44	0.08
SO2C(CF3)3	0.96	1.13	0.84	0.29
SC(CF3)3	0.51	0.58	0.47	0.11
C(SCF3)3	0.51	0.53	0.49	0.04
SeC(CF3)3	0.49	0.54	0.46	0.08
C(CN)3	0.97	0.96	0.92	0.04
cyclo-1-(OH)C4F6	0.36	0.37	0.36	0.01
CH=C(CN)2	0.66	0.84	0.57	0.27
2-(5-bromofuryl)	0.15	0	0.23	-0.23
1-pyrroline-2,5-dione	0.305	0.244	0.317	-0.073
3-chloro-1-pyrrolidine-2,5-dione	0.387	0.359	0.387	-0.028
3-pyridazinyl	0.28	0.48	0.21	0.27
C(Me)(CN)2	0.6	0.57	0.59	-0.02
2-furyl	0.06	0.02	0.1	-0.08
2-thienyl	0.09	0.05	0.13	-0.08
3-thienyl	0.03	-0.02	0.08	-0.1
2-selenienyl	0.06	0.04	0.1	-0.06
1-pyrryl	0.47	0.37	0.5	-0.13
1-pyrrolidine-2,5-dione	0.298	0.257	0.303	-0.046
cyclobutyl	-0.05	-0.14	0.02	-0.16
COCHMe2	0.38	0.47	0.35	0.12
NHCOCH(Me)2	0.11	-0.1	0.21	-0.31
CMe3	-0.1	-0.2	-0.02	-0.18
CH(Me)Et	-0.08	-0.12	-0.02	-0.1
CH2CH(Me)2	-0.07	-0.12	-0.01	-0.11
n-Bu	-0.08	-0.16	-0.01	-0.15
On-Bu	0.1	-0.32	0.29	-0.61
CH2C(OH)Me2	-0.16	-0.17	-0.11	-0.06
C(OMe)3	-0.03	-0.04	0.01	-0.05
AsEt2	0.22	0	0.32	-0.32
As(O)Et2	0.57	0.44	0.6	-0.16
As(S)Et2	0.52	0.44	0.54	-0.1
NH(CH2)3CH3	-0.34	-0.51	-0.21	-0.3
NEt2	-0.23	-0.6	-0.1	-0.5
PO(Et)2	0.37	0.47	0.33	0.14
N=NPO(OEt)2	0.16	0.74	-0.05	0.79
P(Et)2	0.1	0.13	0.11	0.02
P(S)Et2	0.39	0.46	0.36	0.1
CH2OSi(Me)3	-0.04	-0.05	0	-0.05
CH2Si(Me)3	-0.16	-0.21	-0.09	-0.12
PO(NMe2)2	0.3	0.4	0.27	0.13
P(NMe2)2	0.18	0.25	0.17	0.08
C(CN)=C(CN)2	0.77	0.98	0.65	0.33
2-(5-cyanofuryl)	0.25	0.1	0.32	-0.22
3-pyridyl	0.23	0.25	0.24	0.01
4-pyridyl	0.27	0.44	0.21	0.23
2-(4,6-dimethyl-s-triazinyl)	0.25	0.39	0.21	0.18
1-cyclopentenyl	-0.06	-0.05	-0.03	-0.02
cyclopentyl	-0.05	-0.14	0.02	-0.16
COCMe3	0.27	0.32	0.26	0.06
NHCO2n-Bu	0.06	-0.05	0.13	-0.18
CEt(Me)2	-0.06	-0.18	0.03	-0.21
CH2C(Me)3	-0.05	-0.17	0.03	-0.14
(CH2)4CH3	-0.08	-0.15	-0.01	-0.14
O(CH2)4CH3	0.1	-0.34	0.29	-0.63
CH2PO(OEt)2	0.12	0.06	0.17	-0.11
CH2CH2SiMe3	-0.16	-0.17	-0.11	-0.06
Si(Me)2OSiMe3	0	-0.01	0.04	-0.05
C6Cl5	0.25	0.24	0.27	-0.03
C6F5	0.26	0.27	0.27	0
P(O)(C3F7)2	0.95	1.1	0.84	0.26
OP(O)(C3F7)2	0.66	0.56	0.67	-0.11
NHP(O)(C3F7)2	0.28	0.18	0.33	-0.15
CH2Mn(CO)5	-0.14	-0.44	0.02	-0.46
C6H2-2,4,6-(NO2)3	0.26	0.3	0.26	0.04
C6H4-3-Br	0.09	0.08	0.12	-0.04
C6H4-4-Br	0.15	0.12	0.18	-0.06
C6H4-3-Cl	0.15	0.1	0.19	-0.09
C6H4-4-Cl	0.15	0.12	0.18	-0.06
C6H4-3-F	0.15	0.1	0.19	-0.09
C6H4-4-F	0.12	0.06	0.17	-0.11
OC6H4-4-F	-0.08	-0.1	-0.03	-0.07
C6H4-3-NO2	0.21	0.2	0.23	-0.03
C6H4-4-NO2	0.25	0.26	0.26	0
SC6H4-4-NO2	0.32	0.24	0.36	-0.12
SOC6H4-4-NO2	0.58	0.6	0.55	0.05
2-benzotriazolyl	0.49	0.51	0.47	0.04
N(O)=NSO2Ph	0.69	0.79	0.62	0.17
N=NPh	0.32	0.39	0.3	0.09
OPh	0.25	-0.03	0.37	-0.4
SOPh	0.5	0.44	0.51	-0.07
2-(5-acetylfuryl)	0.24	0.08	0.31	-0.23
2-(6-methylpyronyl)	0.38	0.43	0.36	0.07
SO2Ph	0.62	0.68	0.5	0.1
OSO2Ph	0.36	0.33	0.37	-0.04
SPh	0.23	0.07	0.3	-0.23
NHPh	-0.02	-0.56	0.22	-0.78
NHSO2Ph	0.33	0.03	0.43	-0.4
SO2NHPh	0.56	0.65	0.51	0.14
2-(5-ethylfuryl)	0.09	-0.13	0.2	-0.33
1-(2,5-dimethylpyrryl)	0.49	0.38	0.52	-0.14
1-cyclohexenyl	-0.1	-0.08	-0.07	-0.01
cyclohexyl	-0.05	-0.15	0.03	-0.18
N(n-Pr)2	-0.26	-0.6	-0.14	-0.46
(CH2)4NMe2	-0.08	-0.16	-0.01	-0.15
PO(i-Pr)2	0.37	0.41	0.36	0.05
P(i-Pr)2	0.02	0.06	0.04	0.02
P(O)(OPr)2	0.38	0.5	0.33	0.17
Ge(Et)3	0	0	0.03	-0.03
Si(OEt)3	0.02	0.08	0.03	0.05
P(=NSO2CF3)(C3F7)2	1.24	1.37	1.11	0.26
Si(NMe2)3	-0.04	-0.04	0	-0.04
2-benzoxazolyl	0.3	0.33	0.3	0.04
2-benzthiazolyl	0.27	0.29	0.27	0.02
COPh	0.34	0.43	0.31	0.12
OCOPh	0.21	0.13	0.26	-0.13
COOPh	0.37	0.44	0.34	0.1
CH=NPh	0.35	0.42	0.33	0.09
NHCOPh	0.02	-0.19	0.13	-0.32
CONHPh	0.23	0.41	0.17	0.24
C6H4-4-Me	0.06	-0.03	0.12	-0.15
CH2Ph	-0.08	-0.09	-0.04	-0.05
N=NPh-5-Me-2-OH	0.27	0.31	0.26	0.05
C6H4-4-OMe	0.05	-0.08	0.13	-0.21
CH(OH)Ph	0	-0.03	0.05	-0.08
CH2OPh	0.06	0.07	0.08	-0.01
CH2SO2Ph	0.15	0.16	0.17	-0.01
C(Et)3	-0.07	-0.2	0.02	-0.22
(CH2)6CH3	-0.07	-0.16	0	-0.16
SiMe(OSi(Me)3)2	-0.02	-0.01	0.01	-0.02
CF2CF2C6H4-4-F	0.34	0.39	0.32	0.07
C≡CPh	0.14	0.16	0.15	0.01
CH=NCOPh	0.39	0.51	0.34	0.17
CH=CHPh	0.03	-0.07	0.1	-0.17
CH2Fe(CO)2(pi-C5H5)	-0.26	-0.49	-0.11	-0.38
CH=NNHCOPh	0.39	0.51	0.34	0.17
NHCOC6H4-4-OMe	0.09	-0.06	0.17	-0.23
SCH=NSO2C6H4-4-Me	0.65	0.7	0.61	0.09
C6H4-4-Et	0.07	-0.02	0.13	-0.15
CH2CH2Ph	-0.07	-0.12	-0.01	-0.11
SiPhMe2	0.04	0.07	0.06	0.01
S(Me)=NSO2C6H4-4-Me	0.65	0.7	0.61	0.09
PO(t-Bu)2	0.31	0.41	0.28	0.13
PO(n-Bu)2	0.35	0.49	0.3	0.19
PO(On-Bu)2	0.41	0.57	0.35	0.22
P(t-Bu)2	0.01	0.15	-0.01	0.16
C6H5Cr(CO)3	0.29	0.14	0.36	-0.22
2-benzo-4-thiopyronyl	0.34	0.35	0.34	0.01
2-benzothiopyronyl	0.48	0.45	0.48	-0.03
2-(benzo-1,4-pyronyl)	0.41	0.4	0.41	-0.01
C6H4-4-CHMe2	0.08	0.01	0.13	-0.12
Si(OSiMe3)3	-0.09	-0.01	-0.08	0.07
ferrocenyl	-0.15	-0.18	-0.09	-0.09
C6H4-4-CMe3	0.07	0.01	0.12	-0.11
1-dibenzarsenyl	0.19	0.13	0.23	-0.1
1-dibenzoarsoxyl	0.17	0.09	0.22	-0.13
1-dibenzoarsazinyl	0.14	0.09	0.18	-0.09
AsPh2	0.03	0.09	0.04	0.05
AsOPh2	0.54	0.64	0.49	0.15
PPh2BCl3	0.67	0.72	0.62	0.1
NPh2	0	-0.22	0.12	-0.34
POPh2	0.38	0.53	0.32	0.21
PPh2	0.11	0.19	0.1	0.09
PSPh2	0.29	0.47	0.23	0.24
P(NPr2)-C6H4-3-F	0.2	0.24	0.2	0.04
pyron-comp1	0.37	0.38	0.37	0.01
pyron-comp2	0.38	0.38	0.38	0
imidazole-comp1	0.17	0.21	0.17	0.04
CHPh2	-0.03	-0.05	0.01	-0.06
As-comp1	0.12	0.07	0.16	-0.09
POPh(Ph-4-Me)	0.13	0.3	0.09	0.21
CH2POPh2	0.14	0.01	0.21	-0.2
PS(Ph)(Ph-4-Me)	0.09	0.3	0.03	0.27
Si(Me)Ph2	0.1	0.13	0.11	0.02
COOCHPh2	0.36	0.56	0.28	0.28
PO(Ph-4-Me)2	0.17	0.3	0.14	0.16
PS(Ph-4-Me)2	0.2	0.23	0.2	0.03
GePh3	0.05	0.08	0.07	0.01
N=PPh3	-0.33	-0.77	-0.1	-0.67
SiPh3	-0.03	0.1	-0.04	0.14
CPh3	-0.01	0.02	0.01	0.01
1-(1,2(BH)10-C2H)	0.49	0.43	0.5	-0.07
1-(1,7(BH)10-C2H)	0.25	0.33	0.23	0.1
2-(1,7(BH)10-C2H)	0.14	0.15	0.16	-0.01
4-(1,7(BH)10-C2H)	-0.02	0.02	0	0.02
3-(1,2(BH)10-C2H)	0.2	0.19	0.22	-0.03
1-(1,2(BH)10-C2Me)	0.5	0.65	0.43	0.22
CH2-1-(1,2(BH)10-C2H)	0.12	0.12	0.14	-0.02
CH2-1-(1,7(BH)10-C2H)	0	0.01	0.03	-0.02
2-(methylcarbonyl)carboran-1-yl	0.4	0.63	0.31	0.32
2-((carbonyloxy)methyl)carboran-1-yl	0.7	0.74	0.66	0.08
CH2-1-(1,2(BH)10-C2Me)	0.1	0.11	0.12	-0.01
1-adamantyl	-0.12	-0.13	-0.07	-0.06

## Sheet: Replaced_Values
Functional Groups	Replaced Values (in Ref S1)				Replacing Values				Ref	Note
	σ_m	σ_p	F	R	σ_m	σ_p	F	R
NMe2	-0.16	-0.83	0.15	-0.98	-0.16	-0.6	0	-0.6	Ref S24	For the coherence of para-meters (size of alkyl group should not much affect them!)
NEt2	-0.23	-0.72	0.01	-0.73	-0.23	-0.6	-0.1	-0.5
N(n-Pr)2	-0.26	-0.93	0.06	-0.99	-0.26	-0.6	-0.14	-0.46
1-pyrroline-2,5-dione	0.33	0.27	0.36	-0.09	0.305	0.244	0.317	-0.073	Ref S25	For the coherence of para-meters (use values from NMR instead of values from pKa)
3-chloro-1-pyrrolidine-2,5-dione	0.47	0.46	0.47	-0.01	0.387	0.359	0.387	-0.028
1-pyrrolidine-2,5-dione	0.34	0.31	0.36	-0.05	0.298	0.257	0.303	-0.046
NHSO2Ph	0.16	0.01	0.24	-0.23	0.33	0.03	0.43	-0.4	Ref S26	Incorrect Reference

## Sheet: B3LYP_6-311++g(d,p)_SMD
Functional Groups	σ_m	σ_p	F	R	Δq_{C,m}	Δq_{C,p}	ΔV_{m}	ΔV_{p}
Refernece Values for H	0	0	0	0	-0.048573	-0.048632	-14.7797	-14.7797
H	0	0	0	0	0	0	0	0
Me	-0.07	-0.17	0.01	-0.18	-0.002998	-0.008854	-0.004889	-0.007355
CH=CH2	0.06	-0.04	0.13	-0.17	0.001599	0.00138	0.002179	0.002016
Ph	0.06	-0.01	0.12	-0.13	0.001392	-0.000575	0.001547	0.000774
OAc	0.39	0.31	0.42	-0.11	0.011308	0.004299	0.010849	0.007886
NHCOCH3	0.21	0	0.31	-0.31	0.003997	-0.00761	0.004408	-0.000479
OMe	0.12	-0.27	0.29	-0.56	0.001462	-0.017635	-0.000615	-0.008899
OH	0.12	-0.37	0.33	-0.7	0.002922	-0.017002	0.003686	-0.005272
NH2	-0.16	-0.66	0.08	-0.74	-0.00516	-0.029665	-0.009194	-0.020082
F	0.34	0.06	0.45	-0.39	0.01342	-0.000143	0.01958	0.013605
Cl	0.37	0.23	0.42	-0.19	0.014057	0.007026	0.020798	0.017825
Br	0.39	0.23	0.45	-0.22	0.014504	0.008265	0.021217	0.018625
CHO	0.35	0.42	0.33	0.09	0.014014	0.029456	0.027636	0.033817
COMe	0.38	0.5	0.33	0.17	0.009944	0.02262	0.019587	0.02476
COOMe	0.37	0.45	0.34	0.11	0.011057	0.022219	0.015497	0.021032
COOH	0.37	0.45	0.34	0.11	0.012423	0.024883	0.019612	0.025444
COCl	0.51	0.61	0.46	0.15	0.0205	0.038872	0.038689	0.046287
CF3	0.43	0.54	0.38	0.16	0.016279	0.022064	0.028401	0.030514
CN	0.56	0.66	0.51	0.15	0.019588	0.029594	0.038473	0.042101
NO2	0.71	0.78	0.65	0.13	0.02581	0.03987	0.046817	0.052499
NHMe	-0.21	-0.7	0.03	-0.73	-0.007367	-0.033439	-0.013235	-0.024777
NMe2	-0.16	-0.6	0	-0.6	-0.008498	-0.033462	-0.0157	-0.026699
CHF2	0.29	0.32	0.29	0.03	0.011214	0.016221	0.020518	0.02212
COF	0.55	0.7	0.48	0.22	0.01923	0.036408	0.036845	0.04393
SH	0.25	0.15	0.3	-0.15	0.006811	-0.004268	0.00946	0.004522
NHNH2	-0.02	-0.55	0.22	-0.77	-0.00321	-0.026252	-0.002351	-0.01333
NO	0.62	0.91	0.49	0.42	0.023122	0.046537	0.041457	0.051524
CH2F	0.12	0.11	0.15	-0.04	0.005356	0.009701	0.010843	0.012272
CH2Cl	0.11	0.12	0.13	-0.01	0.005341	0.008026	0.01199	0.012466
CH2Br	0.12	0.14	0.14	0	0.005319	0.007915	0.012424	0.01281
CH2OH	0	0	0.03	-0.03	-0.001167	-0.006691	-0.005905	-0.007808
Et	-0.07	-0.15	0	-0.15	-0.003385	-0.008326	-0.005049	-0.007285
OEt	0.1	-0.24	0.26	-0.5	0.00084	-0.018428	-0.002088	-0.010348
CCH	0.21	0.23	0.22	0.01	0.009272	0.012549	0.012502	0.014494
BF2	0.32	0.48	0.26	0.22	0.008879	0.023895	0.019605	0.025742
GeBr3	0.66	0.73	0.61	0.12	0.02042	0.026917	0.034699	0.037209
SiBr3	0.48	0.57	0.44	0.13	0.017134	0.026307	0.02841	0.032357
SO2Cl	1.2	1.11	1.16	-0.05	0.032767	0.044232	0.056711	0.061182
SCl	0.44	0.48	0.42	0.06	0.018036	0.032875	0.032634	0.03897
POCl2	0.78	0.9	0.7	0.2	0.024785	0.036641	0.044868	0.049411
PCl2	0.54	0.61	0.5	0.11	0.017484	0.027865	0.032556	0.036277
PSCl2	0.7	0.8	0.63	0.17	0.023725	0.032211	0.041968	0.044879
GeCl3	0.71	0.79	0.65	0.14	0.019831	0.027094	0.037993	0.040138
SiCl3	0.48	0.56	0.44	0.12	0.016343	0.026095	0.029494	0.03331
SOF	0.74	0.83	0.67	0.16	0.026189	0.036966	0.044327	0.048461
SO2F	0.8	0.91	0.72	0.19	0.032461	0.044831	0.056548	0.06144
POF2	0.81	0.89	0.74	0.15	0.023879	0.034446	0.045353	0.048811
PF2	0.49	0.59	0.44	0.15	0.015808	0.027325	0.029426	0.033788
GeF3	0.85	0.97	0.76	0.21	0.022426	0.031805	0.046588	0.049078
SF3	0.7	0.8	0.63	0.17	0.029201	0.04193	0.047879	0.053255
SiF3	0.54	0.69	0.47	0.22	0.01688	0.028074	0.031945	0.036264
PF4	0.63	0.8	0.54	0.26	0.01564	0.022689	0.030836	0.032971
SF5	0.61	0.68	0.56	0.12	0.029828	0.03424	0.049239	0.050522
ONO2	0.55	0.7	0.48	0.22	0.016847	0.008475	0.03051	0.026105
N3	0.37	0.08	0.48	-0.4	0.011014	0.006496	0.020971	0.018395
B(OH)2	-0.01	0.12	-0.03	0.15	0.001215	0.009811	0.003709	0.007188
NHOH	-0.04	-0.34	0.11	-0.45	0.00068	-0.017256	-0.001575	-0.009511
SO2NH2	0.53	0.6	0.49	0.11	0.022524	0.030201	0.035424	0.039089
PH2	0.06	0.05	0.09	-0.04	0.00282	-0.001389	0.005187	0.003074
GeH3	0	0.01	0.03	-0.02	0.001939	0.003676	0.003952	0.00459
SiH3	0.05	0.1	0.06	0.04	0.003724	0.007781	0.006026	0.007891
CBr3	0.28	0.29	0.28	0.01	0.016214	0.021738	0.025363	0.027806
CClF2	0.42	0.46	0.4	0.06	0.016662	0.021925	0.028456	0.030408
5-chloro-1-tetrazolyl	0.6	0.61	0.58	0.03	0.020839	0.023545	0.042921	0.042645
N=CCl2	0.21	0.13	0.26	-0.13	0.009854	0.003917	0.016217	0.013377
CCl3	0.4	0.46	0.38	0.09	0.016164	0.021272	0.026177	0.02827
OCCl3	0.43	0.35	0.46	-0.11	0.016431	0.013183	0.027625	0.025732
N=NCF3	0.56	0.68	0.5	0.18	0.020529	0.038219	0.038965	0.046282
OCF3	0.38	0.35	0.39	-0.04	0.016289	0.011666	0.027656	0.025174
SOCF3	0.63	0.69	0.58	0.11	0.023475	0.029454	0.040459	0.042508
SeOCF3	0.81	0.83	0.76	0.07	0.018748	0.023046	0.036751	0.037289
SO2CF3	0.83	0.96	0.74	0.22	0.030417	0.043299	0.053845	0.058969
SeO2CF3	1.08	1.21	0.97	0.24	0.029722	0.038237	0.058203	0.060206
OSO2CF3	0.56	0.53	0.56	-0.03	0.020561	0.017323	0.033723	0.031846
SCF3	0.4	0.5	0.36	0.14	0.015724	0.021992	0.027702	0.030234
SeCF3	0.44	0.45	0.43	0.02	0.012646	0.017725	0.024379	0.026007
NC	0.48	0.49	0.47	0.02	0.018154	0.01933	0.034516	0.034379
NCO	0.27	0.19	0.31	-0.12	0.010057	0.003371	0.020754	0.017163
OCN	0.67	0.54	0.69	-0.15	0.02127	0.015366	0.040696	0.036633
SO2CN	1.1	1.26	0.97	0.29	0.033153	0.04664	0.061192	0.065944
NCS	0.48	0.38	0.51	-0.13	0.014237	0.01178	0.029661	0.027665
SCN	0.51	0.52	0.49	0.03	0.019292	0.023963	0.036278	0.037386
SeCN	0.61	0.66	0.57	0.09	0.01514	0.019037	0.031974	0.032246
N=NCN	0.71	1.03	0.56	0.47	0.024864	0.049421	0.051381	0.061188
N(O)=NCN	0.78	0.89	0.7	0.19	0.028445	0.043989	0.058115	0.063551
C(NO2)3	0.72	0.82	0.65	0.17	0.025492	0.03824	0.050667	0.054346
CHBr2	0.31	0.32	0.31	0.01	0.011452	0.01552	0.021125	0.022283
CHCl2	0.31	0.32	0.31	0.01	0.011326	0.015234	0.021172	0.022197
OCHCl2	0.38	0.26	0.43	-0.17	0.012707	0.008475	0.018856	0.016819
OCHF2	0.31	0.18	0.37	-0.19	0.012078	0.006523	0.015814	0.013557
SOCHF2	0.54	0.58	0.51	0.07	0.020677	0.022985	0.038573	0.03866
SO2CHF2	0.75	0.86	0.67	0.19	0.027907	0.03899	0.051331	0.055553
SCHF2	0.33	0.37	0.32	0.05	0.012508	0.017175	0.017038	0.01945
S(O)(=NH)CF3	0.72	0.84	0.64	0.2	0.026748	0.037568	0.042673	0.04753
NHSO2CF3	0.44	0.39	0.45	-0.06	0.013522	0.009317	0.02687	0.023695
NHCN	0.21	0.06	0.28	-0.22	0.009388	-0.006616	0.021419	0.012982
1-(1H)-tetrazolyl	0.52	0.5	0.52	-0.02	0.018212	0.016863	0.040489	0.038215
5-(1H)-tetrazolyl	0.64	0.56	0.65	-0.09	0.014115	0.020042	0.033322	0.034368
5-hydroxy-1-tetrazolyl	0.39	0.33	0.41	-0.08	0.017245	0.017033	0.031988	0.031204
OCH2Cl	0.25	0.08	0.33	-0.25	0.009947	0.000382	0.01563	0.010854
OCH2F	0.2	0.02	0.29	-0.27	0.008952	-0.000719	0.013134	0.008624
SCH2F	0.23	0.2	0.25	-0.05	0.009126	0.003769	0.013911	0.011741
NHCHO	0.19	0	0.28	-0.28	0.005726	-0.004949	0.009415	0.004603
CONH2	0.28	0.36	0.26	0.1	0.009685	0.016587	0.01651	0.019392
CSNH2	0.25	0.3	0.24	0.06	0.010017	0.016475	0.019823	0.022102
CH=NOH	0.22	0.1	0.28	-0.18	0.007026	0.010622	0.011047	0.012723
N(O)=NCONH2	0.59	0.63	0.56	0.07	0.021881	0.029527	0.035787	0.039215
CH2SO2Me	0.15	0.17	0.16	0.01	0.006313	0.008467	0.004994	0.005842
SiMeCl2	0.31	0.39	0.29	0.1	0.010149	0.017356	0.018392	0.021378
SiMeF2	0.29	0.23	0.32	-0.09	0.009179	0.016759	0.016114	0.019412
NHCONH2	-0.03	-0.24	0.09	-0.33	0.00167	-0.01373	-0.001897	-0.008129
N(Me)NO2	0.49	0.61	0.43	0.18	0.014583	0.016677	0.028333	0.028141
NHCSNH2	0.22	0.16	0.26	-0.1	0.004051	-0.001277	0.005047	0.00217
SOMe	0.52	0.49	0.52	-0.03	0.015178	0.015012	0.025478	0.025186
S(OMe)	0.21	0.17	0.24	-0.07	0.011495	0.018299	0.019263	0.022669
OS(=O)Me	0.44	0.45	0.43	0.02	0.011023	0.004931	0.013261	0.010934
S(O)OMe	0.5	0.54	0.47	0.07	0.01881	0.023725	0.02479	0.027403
SO2Me	0.6	0.72	0.53	0.19	0.022157	0.029229	0.037665	0.040758
SSO2Me	0.43	0.54	0.38	0.16	0.017093	0.026034	0.033009	0.036419
OSO2Me	0.39	0.36	0.4	-0.04	0.015034	0.010729	0.027081	0.024751
SMe	0.15	0	0.23	-0.23	0.003509	-0.008378	0.003194	-0.002035
SSMe	0.22	0.13	0.27	-0.14	0.00999	0.013863	0.016269	0.018255
SeMe	0.1	0	0.16	-0.16	0.003266	-0.006687	0.003308	-0.001215
CH2NH2	-0.03	-0.11	0.04	-0.15	-0.001987	-0.003681	-0.004453	-0.005001
NHSO2Me	0.2	0.03	0.28	-0.25	0.008511	0.004959	0.009213	0.007675
N(COF)2	0.58	0.57	0.57	0	0.018103	0.019746	0.030148	0.029449
COCF3	0.63	0.8	0.54	0.26	0.0202	0.039384	0.038661	0.046521
SCOCF3	0.48	0.46	0.48	-0.02	0.017332	0.022091	0.028703	0.030099
OCOCF3	0.56	0.46	0.58	-0.12	0.01744	0.011488	0.029759	0.026076
N(CF3)C=O(F)	0.5	0.5	0.49	0.01	0.017861	0.020721	0.032666	0.03263
CF2CF3	0.47	0.52	0.44	0.08	0.016644	0.022814	0.029779	0.031949
OCF2CF3	0.48	0.28	0.55	-0.27	0.016368	0.011586	0.02826	0.025609
SO2CF2CF3	0.92	1.08	0.81	0.27	0.030705	0.044238	0.054094	0.059521
SCF2CF3	0.44	0.48	0.42	0.06	0.016264	0.022615	0.028664	0.031185
N(CF3)2	0.4	0.53	0.35	0.18	0.014324	0.004536	0.022384	0.017684
S(CF3)=NSO2CF3	1.18	1.28	1.07	0.21	0.031606	0.041226	0.065441	0.067658
SO(CF3)=NSO2CF3	1.23	1.4	1.09	0.31	0.035783	0.048906	0.06954	0.073803
N(SO2CF3)2	0.61	0.83	0.5	0.33	0.022707	0.031291	0.0399	0.04256
P(CF3)2	0.6	0.69	0.55	0.14	0.016878	0.027356	0.033404	0.037066
P(CN)2	0.82	0.9	0.75	0.15	0.019537	0.028773	0.043284	0.045371
OCF2CHFCl	0.35	0.28	0.38	-0.1	0.014578	0.009447	0.021655	0.019398
NHCOCF3	0.3	0.12	0.38	-0.26	0.010696	0.00335	0.023532	0.019266
CH=NSO2CF3	0.76	1	0.63	0.37	0.020257	0.040901	0.048255	0.055379
OCF2CHF2	0.34	0.25	0.38	-0.13	0.014643	0.009492	0.021866	0.019582
SCF2CHF2	0.38	0.47	0.35	0.12	0.014501	0.020087	0.022918	0.02558
C2N8S2H	0.63	0.64	0.6	0.04	0.02179	0.024284	0.045096	0.042782
SC≡CH	0.26	0.19	0.3	-0.11	0.013803	0.01699	0.020555	0.022302
SCH=CHCl	0.31	0.24	0.34	-0.1	0.011582	0.014762	0.023004	0.024137
SeCH=CHCl	0.28	0.26	0.3	-0.04	0.009583	0.012215	0.02076	0.021428
CH2CF3	0.12	0.09	0.15	-0.06	0.004027	0.003551	0.010472	0.009458
CH2SOCF3	0.25	0.24	0.27	-0.03	0.008077	0.00982	0.018079	0.017784
CH2SO2CF3	0.29	0.31	0.29	0.02	0.010583	0.014623	0.021187	0.021826
CH2SCF3	0.12	0.15	0.13	0.02	0.005386	0.006208	0.016169	0.015401
CH2CN	0.16	0.18	0.17	0.01	0.005734	0.004147	0.01627	0.014097
NHCOCH2Cl	0.17	-0.03	0.27	-0.3	0.006738	-0.002894	0.012735	0.008096
N(Me)SO2CF3	0.46	0.44	0.46	-0.02	0.013499	0.014973	0.027291	0.026863
C(Me)(NO2)2	0.54	0.61	0.5	0.11	0.013949	0.022628	0.031506	0.033879
oxiranyl	0.05	0.03	0.09	-0.06	0.003292	0.001393	0.005476	0.004501
OCH=CH2	0.21	-0.09	0.34	-0.43	0.006777	-0.010149	0.00899	0.001321
SCOMe	0.39	0.44	0.37	0.07	0.011644	0.015186	0.010638	0.012625
2-thiacylopropyl	0.04	0.01	0.08	-0.07	0.003211	0.002216	0.007346	0.006354
SCH=CH2	0.26	0.2	0.29	-0.09	0.009916	0.012523	0.016836	0.018293
SeCH=CH2	0.26	0.21	0.29	-0.08	0.008243	0.010346	0.014733	0.015815
1-aziridinyl	-0.07	-0.22	0.03	-0.25	-0.001673	-0.017101	-0.004301	-0.010959
2-aziridinyl	-0.06	-0.1	-0.01	-0.09	0.001367	-0.003215	0.006342	0.003389
N-methyl-3-oxaziridinyl	0.09	0.12	0.1	0.02	0.005879	0.008878	0.007221	0.008796
NHCOOMe	-0.02	-0.17	0.07	-0.24	0.003948	-0.010199	0.002884	-0.002995
CONHMe	0.35	0.36	0.35	0.01	0.008163	0.011945	0.012193	0.014173
CH=NOMe	0.37	0.3	0.4	-0.1	0.006801	0.010328	0.009819	0.011589
CH2CONH2	0.06	0.07	0.08	-0.01	0.002628	0.00037	0.018358	0.016396
NHCSMe	0.24	0.12	0.3	-0.18	0.007102	0.000121	0.013523	0.009875
CSNHMe	0.3	0.34	0.29	0.05	0.010018	0.016481	0.019824	0.022106
CH=NNHCONHNH2	0.22	0.16	0.26	-0.1	0.003534	0.005115	-0.002678	-0.000853
CH(OH)Me	0.08	-0.07	0.16	-0.23	4e-06	-0.001993	-0.004352	-0.00474
CH2OMe	0.08	0.01	0.13	-0.12	0.001204	0.002305	-0.002136	-0.001286
SO2Et	0.66	0.77	0.59	0.18	0.021727	0.028836	0.036064	0.039286
SEt	0.18	0.03	0.26	-0.23	0.004116	-0.005398	0.003999	6e-06
P(Cl)NMe2	0.38	0.56	0.31	0.25	0.008772	0.011558	0.014237	0.015724
SiClMe2	0.16	0.21	0.16	0.05	0.004303	0.010348	0.008478	0.010748
SiFMe2	0.12	0.17	0.12	0.05	0.00352	0.010001	0.006193	0.008863
NHEt	-0.24	-0.61	-0.04	-0.57	-0.007517	-0.033393	-0.013748	-0.02514
N(Me)SO2Me	0.21	0.24	0.21	0.03	0.008901	0.009057	0.008703	0.008768
SO2NMe2	0.51	0.65	0.44	0.21	0.02181	0.029206	0.033156	0.03702
N(SO2Me)2	0.47	0.49	0.45	0.04	0.015942	0.021925	0.026567	0.028858
SN(Me)2	0.12	0.09	0.15	-0.06	0.003343	-0.009001	-0.001188	-0.005903
N=NNMe2	-0.05	-0.03	-0.02	-0.01	-0.001136	-0.009471	-0.013436	-0.015386
P(O)Me2	0.43	0.5	0.4	0.1	0.008764	0.013539	0.016669	0.018546
PO(OMe)2	0.42	0.53	0.37	0.16	0.013722	0.022677	0.018708	0.023563
PMe2	0.03	0.06	0.05	0.01	0.000342	-0.001972	0.000542	-0.000647
SiH(Me)2	0.01	0.04	0.03	0.01	-0.000289	0.002748	-0.001098	0.000425
CCCF3	0.41	0.51	0.37	0.14	0.015436	0.023583	0.032008	0.03477
CF=CFCF3	0.39	0.46	0.36	0.1	0.014517	0.022375	0.029837	0.032449
N=C(CF3)2	0.29	0.23	0.32	-0.09	0.013388	0.011053	0.026511	0.02449
CF2CF2CF3	0.44	0.48	0.42	0.06	0.016589	0.023209	0.029706	0.032039
CF(CF3)2	0.37	0.53	0.31	0.22	0.016733	0.02024	0.028975	0.029957
SO2CF2CF2CF3	0.92	1.09	0.81	0.28	0.030548	0.044099	0.054008	0.059441
SO2CF(CF3)2	0.92	1.1	0.8	0.3	0.031913	0.045321	0.05573	0.061044
SCF2CF2CF3	0.45	0.48	0.43	0.05	0.016107	0.022586	0.028741	0.031305
SCF(CF3)2	0.48	0.51	0.46	0.03	0.016987	0.022953	0.030329	0.032505
C(OH)(CF3)2	0.29	0.3	0.29	0.01	0.013664	0.016972	0.027695	0.027988
CH(SCF3)2	0.44	0.44	0.43	0.01	0.012315	0.013962	0.024636	0.024147
CH(CN)2	0.53	0.52	0.52	0	0.014192	0.015368	0.034154	0.032417
CH=CHCF3-c	0.16	0.17	0.18	-0.01	0.008513	0.016036	0.016185	0.0192
CH=CHCF3-t	0.24	0.27	0.24	0.03	0.007546	0.012669	0.021037	0.021926
CCMe	0.21	0.03	0.29	-0.26	0.005648	0.006032	0.003755	0.004904
N(Me)COCF3	0.41	0.39	0.41	-0.02	0.011529	0.010645	0.020527	0.01917
cyclopropyl	-0.07	-0.21	0.02	-0.23	-0.002915	-0.010373	-0.00557	-0.008901
C(Me)=CH2	0.09	0.05	0.13	-0.08	0.000199	-0.001079	-0.000184	-0.000704
CH=CHMe	0.02	-0.09	0.09	-0.18	-0.000856	-0.00419	-0.003364	-0.004665
CH2CH=CH2	-0.11	-0.14	-0.06	-0.08	-0.001376	-0.005766	-0.00115	-0.003139
C(Et)(NO2)2	0.56	0.64	0.51	0.13	0.015442	0.022798	0.030833	0.03264
OCH2CH=CH2	0.09	-0.25	0.25	-0.5	0.002021	-0.016695	0.001205	-0.007081
COEt	0.38	0.48	0.34	0.14	0.010043	0.022843	0.019078	0.024436
COOEt	0.37	0.45	0.34	0.11	0.010624	0.021604	0.014207	0.019745
CH2OCOMe	0.04	0.05	0.07	-0.02	0.003853	0.005802	0.009253	0.009695
CH2CH2COOH	-0.03	-0.07	0.02	-0.09	-0.000891	-0.004613	0.003772	0.001411
SCH2CH=CH2	0.19	0.12	0.23	-0.11	0.004301	-0.007239	0.005241	2.9e-05
SeCH2CH=CH2	0.21	0.12	0.26	-0.14	0.005992	0.005923	0.010242	0.010294
CH2NHCOMe	0.05	-0.05	0.12	-0.17	0.00251	0.002052	0.015079	0.013848
NHCOOEt	0.11	-0.15	0.23	-0.38	0.003695	-0.010473	0.0019	-0.003905
C(NO2)Me2	0.18	0.2	0.19	0.01	0.006642	0.006669	0.013585	0.012536
isopropyl	-0.04	-0.15	0.04	-0.19	-0.003631	-0.008659	-0.005446	-0.007762
Pr	-0.06	-0.13	0.01	-0.14	-0.003578	-0.008476	-0.005386	-0.007601
NHCONHEt	0.04	-0.26	0.19	-0.45	0.000406	-0.016142	-0.005676	-0.012151
NHCSNHEt	0.3	0.07	0.4	-0.33	0.002195	-0.00476	0.000104	-0.003219
OCHMe2	0.1	-0.45	0.34	-0.79	0.000252	-0.019759	-0.00343	-0.011926
OPr	0.1	-0.25	0.26	-0.51	0.000809	-0.018484	-0.002354	-0.010592
CH2CH(OH)Me	-0.12	-0.17	-0.06	-0.11	-0.003174	-0.007153	-0.010239	-0.01128
C(OOH)Me2	0.06	-0.14	0.17	-0.31	0.001839	0.002466	0.001329	0.001708
SCHMe2	0.23	0.07	0.3	-0.23	0.00516	0.001865	0.0066	0.005578
CH2NMe2	0	0.01	0.03	-0.02	-0.001628	-0.003832	-0.003952	-0.00451
GeMe3	0	0	0.03	-0.03	-0.002739	-0.001939	-0.004413	-0.00405
Si(Me)2OMe	0.04	-0.02	0.09	-0.11	0.00052	0.005628	-0.004417	-0.00158
OSiMe3	0.13	-0.27	0.31	-0.58	0.001577	-0.012654	-0.001307	-0.006829
SiMe(OMe)2	0.04	0.1	0.05	0.05	0.001473	0.007052	-0.007835	-0.003709
Si(OMe)3	0.09	0.13	0.1	0.03	0.004449	0.010982	0.004515	0.008537
SiMe3	-0.04	-0.07	0.01	-0.08	-0.002223	0.000335	-0.003898	-0.002706
cyclo-C4F7	0.48	0.53	0.45	0.08	0.013217	0.016353	0.026305	0.02661
COCF2CF2CF3	0.63	0.79	0.55	0.24	0.019981	0.040063	0.03916	0.047316
C(CF3)3	0.55	0.55	0.53	0.02	0.016657	0.021714	0.029032	0.030639
(CF2)3CF3	0.47	0.52	0.44	0.08	0.016472	0.023235	0.029935	0.032314
SO2C(CF3)3	0.96	1.13	0.84	0.29	0.032445	0.047219	0.057133	0.063007
SC(CF3)3	0.51	0.58	0.47	0.11	0.016765	0.025583	0.031254	0.034669
C(SCF3)3	0.51	0.53	0.49	0.04	0.019613	0.026095	0.036828	0.038823
SeC(CF3)3	0.49	0.54	0.46	0.08	0.014596	0.022503	0.030265	0.032765
C(CN)3	0.97	0.96	0.92	0.04	0.022661	0.031471	0.05868	0.059567
cyclo-1-(OH)C4F6	0.36	0.37	0.36	0.01	0.008619	0.011456	0.014433	0.015272
CH=C(CN)2	0.66	0.84	0.57	0.27	0.018165	0.036321	0.046037	0.051891
2-(5-bromofuryl)	0.15	0	0.23	-0.23	0.004984	0.002416	0.007499	0.006344
1-pyrroline-2,5-dione	0.305	0.244	0.317	-0.073	0.011391	0.011232	0.011398	0.011379
3-chloro-1-pyrrolidine-2,5-dione	0.387	0.359	0.387	-0.028	0.014317	0.015478	0.018309	0.018179
3-pyridazinyl	0.28	0.48	0.21	0.27	0.005927	0.008791	0.008343	0.009769
C(Me)(CN)2	0.6	0.57	0.59	-0.02	0.013223	0.01192	0.030156	0.028162
2-furyl	0.06	0.02	0.1	-0.08	0.003366	0.000114	0.001994	0.000979
2-thienyl	0.09	0.05	0.13	-0.08	0.004411	0.001591	0.004728	0.003803
3-thienyl	0.03	-0.02	0.08	-0.1	0.001556	-0.001326	0.002576	0.001264
2-selenienyl	0.06	0.04	0.1	-0.06	0.002888	3e-05	0.003986	0.002697
1-pyrryl	0.47	0.37	0.5	-0.13	0.006457	-0.005513	0.011674	0.005616
1-pyrrolidine-2,5-dione	0.298	0.257	0.303	-0.046	0.012258	0.012885	0.010345	0.010606
cyclobutyl	-0.05	-0.14	0.02	-0.16	-0.003349	-0.00728	-0.004926	-0.006828
COCHMe2	0.38	0.47	0.35	0.12	0.009189	0.020394	0.016716	0.021472
NHCOCH(Me)2	0.11	-0.1	0.21	-0.31	0.00383	-0.007894	0.00382	-0.001061
CMe3	-0.1	-0.2	-0.02	-0.18	-0.004603	-0.009088	-0.006606	-0.008857
CH(Me)Et	-0.08	-0.12	-0.02	-0.1	-0.003825	-0.009004	-0.005901	-0.008245
CH2CH(Me)2	-0.07	-0.12	-0.01	-0.11	-0.00351	-0.008558	-0.005094	-0.007317
n-Bu	-0.08	-0.16	-0.01	-0.15	-0.003664	-0.00871	-0.005627	-0.007902
On-Bu	0.1	-0.32	0.29	-0.61	0.000759	-0.018552	-0.002501	-0.010741
CH2C(OH)Me2	-0.16	-0.17	-0.11	-0.06	-0.003428	-0.006917	-0.007317	-0.00889
C(OMe)3	-0.03	-0.04	0.01	-0.05	0.004712	0.005408	0.004174	0.005863
AsEt2	0.22	0	0.32	-0.32	-0.000801	-0.000182	8e-05	0.000203
As(O)Et2	0.57	0.44	0.6	-0.16	0.007877	0.010758	0.016317	0.017199
As(S)Et2	0.52	0.44	0.54	-0.1	0.008025	0.011025	0.019086	0.019496
NH(CH2)3CH3	-0.34	-0.51	-0.21	-0.3	-0.007656	-0.033663	-0.01422	-0.025627
NEt2	-0.23	-0.6	-0.1	-0.5	-0.011196	-0.040349	-0.01955	-0.032386
PO(Et)2	0.37	0.47	0.33	0.14	0.008188	0.012345	0.015007	0.016759
N=NPO(OEt)2	0.16	0.74	-0.05	0.79	0.017614	0.032705	0.02715	0.03411
P(Et)2	0.1	0.13	0.11	0.02	0.001165	0.003342	0.002451	0.003481
P(S)Et2	0.39	0.46	0.36	0.1	0.008658	0.013214	0.018738	0.020085
CH2OSi(Me)3	-0.04	-0.05	0	-0.05	0.000368	0.000629	-0.004137	-0.003541
CH2Si(Me)3	-0.16	-0.21	-0.09	-0.12	-0.004614	-0.01393	-0.007665	-0.01151
PO(NMe2)2	0.3	0.4	0.27	0.13	0.008755	0.014886	0.010886	0.014546
P(NMe2)2	0.18	0.25	0.17	0.08	0.001961	0.004694	-0.000535	0.00146
C(CN)=C(CN)2	0.77	0.98	0.65	0.33	0.023969	0.039514	0.054877	0.059357
2-(5-cyanofuryl)	0.25	0.1	0.32	-0.22	0.008916	0.011041	0.021439	0.021335
3-pyridyl	0.23	0.25	0.24	0.01	0.003709	0.002772	0.009906	0.008904
4-pyridyl	0.27	0.44	0.21	0.23	0.005202	0.006336	0.014837	0.014442
2-(4,6-dimethyl-s-triazinyl)	0.25	0.39	0.21	0.18	0.00786	0.017546	0.008089	0.013337
1-cyclopentenyl	-0.06	-0.05	-0.03	-0.02	-0.001469	-0.004055	-0.003829	-0.004794
cyclopentyl	-0.05	-0.14	0.02	-0.16	-0.003956	-0.008675	-0.006127	-0.008328
COCMe3	0.27	0.32	0.26	0.06	0.00812	0.016875	0.014574	0.018233
NHCO2n-Bu	0.06	-0.05	0.13	-0.18	0.003862	-0.007786	0.003689	-0.001137
CEt(Me)2	-0.06	-0.18	0.03	-0.21	-0.005016	-0.009452	-0.007355	-0.00958
CH2C(Me)3	-0.05	-0.17	0.03	-0.14	-0.0041	-0.008444	-0.005422	-0.007344
(CH2)4CH3	-0.08	-0.15	-0.01	-0.14	-0.003696	-0.008754	-0.005695	-0.007973
O(CH2)4CH3	0.1	-0.34	0.29	-0.63	0.003429	-0.005521	0.002929	-0.000666
CH2PO(OEt)2	0.12	0.06	0.17	-0.11	0.00254	-0.000281	0.001037	0.000492
CH2CH2SiMe3	-0.16	-0.17	-0.11	-0.06	-0.004038	-0.009489	-0.006194	-0.008643
Si(Me)2OSiMe3	0	-0.01	0.04	-0.05	-0.00156	0.001429	-0.006315	-0.004353
C6Cl5	0.25	0.24	0.27	-0.03	0.008219	0.008742	0.01616	0.015712
C6F5	0.26	0.27	0.27	0	0.008993	0.011175	0.019025	0.019067
P(O)(C3F7)2	0.95	1.1	0.84	0.26	0.02406	0.036335	0.046279	0.050343
OP(O)(C3F7)2	0.66	0.56	0.67	-0.11	0.01746	0.009475	0.030661	0.026212
NHP(O)(C3F7)2	0.28	0.18	0.33	-0.15	0.010652	0.002222	0.022705	0.017885
CH2Mn(CO)5	-0.14	-0.44	0.02	-0.46	-0.005966	-0.01619	-0.00603	-0.011444
C6H2-2,4,6-(NO2)3	0.26	0.3	0.26	0.04	0.014994	0.017781	0.026855	0.025825
C6H4-3-Br	0.09	0.08	0.12	-0.04	0.003398	0.002402	0.008622	0.007703
C6H4-4-Br	0.15	0.12	0.18	-0.06	0.002756	0.001378	0.00877	0.007581
C6H4-3-Cl	0.15	0.1	0.19	-0.09	0.003321	0.002313	0.008494	0.007571
C6H4-4-Cl	0.15	0.12	0.18	-0.06	0.002626	0.001132	0.008458	0.00724
C6H4-3-F	0.15	0.1	0.19	-0.09	0.00313	0.002098	0.007732	0.006869
C6H4-4-F	0.12	0.06	0.17	-0.11	0.001978	-0.00012	0.006649	0.005279
OC6H4-4-F	-0.08	-0.1	-0.03	-0.07	0.007695	-0.000331	0.012723	0.008879
C6H4-3-NO2	0.21	0.2	0.23	-0.03	0.005056	0.004836	0.017161	0.015733
C6H4-4-NO2	0.25	0.26	0.26	0	0.006689	0.009054	0.02387	0.023197
SC6H4-4-NO2	0.32	0.24	0.36	-0.12	0.01016	0.012727	0.023819	0.024066
SOC6H4-4-NO2	0.58	0.6	0.55	0.05	0.019594	0.023107	0.039649	0.039927
2-benzotriazolyl	0.49	0.51	0.47	0.04	0.016309	0.017966	0.020813	0.021856
N(O)=NSO2Ph	0.69	0.79	0.62	0.17	0.026031	0.037594	0.04645	0.051081
N=NPh	0.32	0.39	0.3	0.09	0.010106	0.017176	0.011321	0.015203
OPh	0.25	-0.03	0.37	-0.4	0.007232	-0.00089	0.008115	0.004752
SOPh	0.5	0.44	0.51	-0.07	0.016174	0.016587	0.022452	0.022813
2-(5-acetylfuryl)	0.24	0.08	0.31	-0.23	0.008053	0.010002	0.020419	0.020266
2-(6-methylpyronyl)	0.38	0.43	0.36	0.07	0.010576	0.015969	0.024865	0.026143
SO2Ph	0.62	0.68	0.5	0.1	0.022162	0.028978	0.032481	0.035955
OSO2Ph	0.36	0.33	0.37	-0.04	0.0145	0.010736	0.012443	0.01174
SPh	0.23	0.07	0.3	-0.23	0.007948	0.009804	0.009539	0.010908
NHPh	-0.02	-0.56	0.22	-0.78	-0.001249	-0.021155	-0.000844	-0.010021
NHSO2Ph	0.33	0.03	0.43	-0.4	0.009457	0.004327	0.01819	0.016045
SO2NHPh	0.56	0.65	0.51	0.14	0.022768	0.029549	0.0371	0.0403
2-(5-ethylfuryl)	0.09	-0.13	0.2	-0.33	0.002028	-0.002506	-0.00159	-0.002959
1-(2,5-dimethylpyrryl)	0.49	0.38	0.52	-0.14	0.008807	0.007472	0.017431	0.016746
1-cyclohexenyl	-0.1	-0.08	-0.07	-0.01	-0.002559	-0.006365	-0.006018	-0.007431
cyclohexyl	-0.05	-0.15	0.03	-0.18	-0.004097	-0.008971	-0.006519	-0.00874
N(n-Pr)2	-0.26	-0.6	-0.14	-0.46	-0.011395	-0.04071	-0.019895	-0.032802
(CH2)4NMe2	-0.08	-0.16	-0.01	-0.15	-0.00359	-0.00848	-0.004805	-0.007085
PO(i-Pr)2	0.37	0.41	0.36	0.05	0.008725	0.013283	0.0146	0.016363
P(i-Pr)2	0.02	0.06	0.04	0.02	-0.000376	-0.004181	-0.001208	-0.002908
P(O)(OPr)2	0.38	0.5	0.33	0.17	0.013104	0.021664	0.0165	0.021387
Ge(Et)3	0	0	0.03	-0.03	-0.004038	-0.003533	-0.006382	-0.006184
Si(OEt)3	0.02	0.08	0.03	0.05	0.002864	0.008594	-0.0099	-0.005258
P(=NSO2CF3)(C3F7)2	1.24	1.37	1.11	0.26	0.029196	0.044919	0.064344	0.068677
Si(NMe2)3	-0.04	-0.04	0	-0.04	-0.002573	0.001079	-0.006258	-0.004009
2-benzoxazolyl	0.3	0.33	0.3	0.04	0.011123	0.014619	0.0141	0.015913
2-benzthiazolyl	0.27	0.29	0.27	0.02	0.009559	0.011519	0.011365	0.012643
COPh	0.34	0.43	0.31	0.12	0.009245	0.02259	0.014663	0.020537
OCOPh	0.21	0.13	0.26	-0.13	0.011563	0.004477	0.009537	0.006767
COOPh	0.37	0.44	0.34	0.1	0.012801	0.025282	0.01951	0.0255
CH=NPh	0.35	0.42	0.33	0.09	0.006652	0.01358	0.009918	0.013122
NHCOPh	0.02	-0.19	0.13	-0.32	0.004661	-0.006465	0.004643	4e-05
CONHPh	0.23	0.41	0.17	0.24	0.010448	0.016506	0.019211	0.021486
C6H4-4-Me	0.06	-0.03	0.12	-0.15	0.000518	-0.002163	-0.001297	-0.002201
CH2Ph	-0.08	-0.09	-0.04	-0.05	-0.001405	-0.005765	-0.002797	-0.004793
N=NPh-5-Me-2-OH	0.27	0.31	0.26	0.05	0.009822	0.015899	0.014864	0.017594
C6H4-4-OMe	0.05	-0.08	0.13	-0.21	-3.4e-05	-0.003495	-0.002128	-0.003384
CH(OH)Ph	0	-0.03	0.05	-0.08	0.001879	0.000863	0.005715	0.004943
CH2OPh	0.06	0.07	0.08	-0.01	0.002857	0.004523	0.004291	0.004917
CH2SO2Ph	0.15	0.16	0.17	-0.01	0.006459	0.008942	0.003632	0.004822
C(Et)3	-0.07	-0.2	0.02	-0.22	-0.005727	-0.010478	-0.008203	-0.010631
(CH2)6CH3	-0.07	-0.16	0	-0.16	-0.00374	-0.008738	-0.005797	-0.008055
SiMe(OSi(Me)3)2	-0.02	-0.01	0.01	-0.02	-0.000196	0.003784	-0.003667	-0.001076
CF2CF2C6H4-4-F	0.34	0.39	0.32	0.07	0.013202	0.018255	0.018809	0.021089
C≡CPh	0.14	0.16	0.15	0.01	0.007707	0.009812	0.008876	0.01045
CH=NCOPh	0.39	0.51	0.34	0.17	0.012183	0.024661	0.024165	0.029099
CH=CHPh	0.03	-0.07	0.1	-0.17	0.001071	-4.8e-05	0.001932	0.001242
CH2Fe(CO)2(pi-C5H5)	-0.26	-0.49	-0.11	-0.38	-0.007976	-0.018102	-0.01185	-0.015872
CH=NNHCOPh	0.39	0.51	0.34	0.17	0.007177	0.011738	0.011311	0.01335
NHCOC6H4-4-OMe	0.09	-0.06	0.17	-0.23	0.003936	-0.007622	0.001231	-0.003294
SCH=NSO2C6H4-4-Me	0.65	0.7	0.61	0.09	0.016378	0.019108	0.034226	0.034271
C6H4-4-Et	0.07	-0.02	0.13	-0.15	0.000561	-0.002033	-0.001262	-0.002122
CH2CH2Ph	-0.07	-0.12	-0.01	-0.11	-0.002669	-0.007136	-0.001964	-0.004309
SiPhMe2	0.04	0.07	0.06	0.01	-0.001197	0.001919	-0.003308	-0.001642
S(Me)=NSO2C6H4-4-Me	0.65	0.7	0.61	0.09	0.020968	0.02381	0.033386	0.033969
PO(t-Bu)2	0.31	0.41	0.28	0.13	0.007079	0.011458	0.011479	0.01376
PO(n-Bu)2	0.35	0.49	0.3	0.19	0.007802	0.011844	0.013886	0.015635
PO(On-Bu)2	0.41	0.57	0.35	0.22	0.013081	0.021705	0.016265	0.021195
P(t-Bu)2	0.01	0.15	-0.01	0.16	0.000642	0.003358	0.001302	0.002794
C6H5Cr(CO)3	0.29	0.14	0.36	-0.22	0.006889	0.008071	0.01876	0.017571
2-benzo-4-thiopyronyl	0.34	0.35	0.34	0.01	0.01228	0.019882	0.028255	0.030361
2-benzothiopyronyl	0.48	0.45	0.48	-0.03	0.011978	0.015665	0.023385	0.024409
2-(benzo-1,4-pyronyl)	0.41	0.4	0.41	-0.01	0.011376	0.018103	0.025093	0.027062
C6H4-4-CHMe2	0.08	0.01	0.13	-0.12	0.000492	-0.002169	-0.001416	-0.002311
Si(OSiMe3)3	-0.09	-0.01	-0.08	0.07	0.000873	0.005187	-0.004385	-0.001397
ferrocenyl	-0.15	-0.18	-0.09	-0.09	-0.000439	-0.005502	-0.001972	-0.003943
C6H4-4-CMe3	0.07	0.01	0.12	-0.11	0.000473	-0.002162	-0.001596	-0.002459
1-dibenzarsenyl	0.19	0.13	0.23	-0.1	0.002737	0.004639	0.003189	0.004282
1-dibenzoarsoxyl	0.17	0.09	0.22	-0.13	0.011421	0.015939	0.018496	0.020679
1-dibenzoarsazinyl	0.14	0.09	0.18	-0.09	0.003524	0.005544	0.000758	0.002064
AsPh2	0.03	0.09	0.04	0.05	0.002334	0.002526	0.003073	0.003559
AsOPh2	0.54	0.64	0.49	0.15	0.010772	0.014841	0.018297	0.020104
PPh2BCl3	0.67	0.72	0.62	0.1	0.015983	0.022784	0.02838	0.031182
NPh2	0	-0.22	0.12	-0.34	0.001486	-0.010436	0.001621	-0.003028
POPh2	0.38	0.53	0.32	0.21	0.011572	0.017538	0.015829	0.019339
PPh2	0.11	0.19	0.1	0.09	0.004364	0.005483	0.004323	0.005672
PSPh2	0.29	0.47	0.23	0.24	0.011807	0.017113	0.018212	0.021075
P(NPr2)-C6H4-3-F	0.2	0.24	0.2	0.04	0.001343	-0.000964	-9e-06	-0.000786
pyron-comp1	0.37	0.38	0.37	0.01	0.011255	0.017187	0.025608	0.027098
pyron-comp2	0.38	0.38	0.38	0	0.010875	0.016732	0.023664	0.025302
imidazole-comp1	0.17	0.21	0.17	0.04	0.007022	0.00999	0.006788	0.009079
CHPh2	-0.03	-0.05	0.01	-0.06	-2.2e-05	-0.003916	-0.001309	-0.002759
As-comp1	0.12	0.07	0.16	-0.09	4.7e-05	-0.002747	-0.004717	-0.005066
POPh(Ph-4-Me)	0.13	0.3	0.09	0.21	0.010995	0.016873	0.013623	0.017196
CH2POPh2	0.14	0.01	0.21	-0.2	0.000728	-0.00227	-0.006553	-0.007093
PS(Ph)(Ph-4-Me)	0.09	0.3	0.03	0.27	0.011511	0.01691	0.016763	0.019848
Si(Me)Ph2	0.1	0.13	0.11	0.02	0.000227	0.003773	-0.001913	0.000358
COOCHPh2	0.36	0.56	0.28	0.28	0.011303	0.02267	0.01501	0.020786
PO(Ph-4-Me)2	0.17	0.3	0.14	0.16	0.010805	0.016607	0.012052	0.015797
PS(Ph-4-Me)2	0.2	0.23	0.2	0.03	0.011111	0.016302	0.014852	0.017978
GePh3	0.05	0.08	0.07	0.01	0.000745	0.002738	-0.000359	0.001038
N=PPh3	-0.33	-0.77	-0.1	-0.67	-0.013271	-0.036016	-0.035172	-0.042737
SiPh3	-0.03	0.1	-0.04	0.14	0.001387	0.005351	-0.000858	0.001752
CPh3	-0.01	0.02	0.01	0.01	0.000153	-0.003148	-0.001921	-0.002837
1-(1,2(BH)10-C2H)	0.49	0.43	0.5	-0.07	0.01119	0.010699	0.029216	0.027051
1-(1,7(BH)10-C2H)	0.25	0.33	0.23	0.1	0.007284	0.006897	0.014737	0.01398
2-(1,7(BH)10-C2H)	0.14	0.15	0.16	-0.01	0.001103	0.002009	0.011387	0.010154
4-(1,7(BH)10-C2H)	-0.02	0.02	0	0.02	-0.001533	-0.001112	-0.001171	-0.001301
3-(1,2(BH)10-C2H)	0.2	0.19	0.22	-0.03	0.001514	0.004324	0.013142	0.012876
1-(1,2(BH)10-C2Me)	0.5	0.65	0.43	0.22	0.010985	0.014611	0.029496	0.029712
CH2-1-(1,2(BH)10-C2H)	0.12	0.12	0.14	-0.02	0.002286	0.000971	0.011205	0.009033
CH2-1-(1,7(BH)10-C2H)	0	0.01	0.03	-0.02	0.001575	-0.001031	0.002899	0.001132
2-(methylcarbonyl)carboran-1-yl	0.4	0.63	0.31	0.32	0.010935	0.015141	0.018444	0.019265
2-((carbonyloxy)methyl)carboran-1-yl	0.7	0.74	0.66	0.08	0.012231	0.017166	0.031434	0.032792
CH2-1-(1,2(BH)10-C2Me)	0.1	0.11	0.12	-0.01	0.002823	0.000723	0.0104	0.008071
1-adamantyl	-0.12	-0.13	-0.07	-0.06	-0.005047	-0.00942	-0.008483	-0.010517

## Sheet: B3LYP_6-311++g(d,p)_PCM
Functional Groups	σ_m	σ_p	F	R	ΔV_{m}	ΔV_{p}
Refernece Values for H	0	0	0	0	-14.7765	-14.7765
H	0	0	0	0	0	0
Me	-0.07	-0.17	0.01	-0.18	-0.004372	-0.006609
CH=CH2	0.06	-0.04	0.13	-0.17	0.002277	0.002185
Ph	0.06	-0.01	0.12	-0.13	0.001523	0.000889
OAc	0.39	0.31	0.42	-0.11	0.00999	0.007002
NHCOCH3	0.21	0	0.31	-0.31	0.003519	-0.001312
OMe	0.12	-0.27	0.29	-0.56	-0.000692	-0.008744
OH	0.12	-0.37	0.33	-0.7	0.003815	-0.004739
NH2	-0.16	-0.66	0.08	-0.74	-0.007844	-0.018068
F	0.34	0.06	0.45	-0.39	0.01813	0.012345
Cl	0.37	0.23	0.42	-0.19	0.019036	0.016146
Br	0.39	0.23	0.45	-0.22	0.019409	0.016945
CHO	0.35	0.42	0.33	0.09	0.024852	0.030511
COMe	0.38	0.5	0.33	0.17	0.0173	0.022092
COOMe	0.37	0.45	0.34	0.11	0.013356	0.018369
COOH	0.37	0.45	0.34	0.11	0.017909	0.023333
COCl	0.51	0.61	0.46	0.15	0.03514	0.042154
CF3	0.43	0.54	0.38	0.16	0.026458	0.028593
CN	0.56	0.66	0.51	0.15	0.035914	0.039439
NO2	0.71	0.78	0.65	0.13	0.04217	0.047018
NHMe	-0.21	-0.7	0.03	-0.73	-0.011929	-0.022906
NMe2	-0.16	-0.6	0	-0.6	-0.014744	-0.025504
CHF2	0.29	0.32	0.29	0.03	0.019505	0.021212
COF	0.55	0.7	0.48	0.22	0.033528	0.040139
SH	0.25	0.15	0.3	-0.15	0.008454	0.003688
NHNH2	-0.02	-0.55	0.22	-0.77	-0.001751	-0.012025
NO	0.62	0.91	0.49	0.42	0.036571	0.045194
CH2F	0.12	0.11	0.15	-0.04	0.01045	0.011975
CH2Cl	0.11	0.12	0.13	-0.01	0.011663	0.012387
CH2Br	0.12	0.14	0.14	0	0.012324	0.013078
CH2OH	0	0	0.03	-0.03	-0.005482	-0.007239
Et	-0.07	-0.15	0	-0.15	-0.004508	-0.006515
OEt	0.1	-0.24	0.26	-0.5	-0.002073	-0.010088
CCH	0.21	0.23	0.22	0.01	0.011391	0.013154
BF2	0.32	0.48	0.26	0.22	0.018577	0.024898
GeBr3	0.66	0.73	0.61	0.12	0.031257	0.033263
SiBr3	0.48	0.57	0.44	0.13	0.02502	0.028387
SO2Cl	1.2	1.11	1.16	-0.05	0.051241	0.055062
SCl	0.44	0.48	0.42	0.06	0.029547	0.035316
POCl2	0.78	0.9	0.7	0.2	0.040242	0.044446
PCl2	0.54	0.61	0.5	0.11	0.029667	0.033269
PSCl2	0.7	0.8	0.63	0.17	0.038226	0.040981
GeCl3	0.71	0.79	0.65	0.14	0.034494	0.036696
SiCl3	0.48	0.56	0.44	0.12	0.0264	0.029868
SOF	0.74	0.83	0.67	0.16	0.038542	0.041678
SO2F	0.8	0.91	0.72	0.19	0.051024	0.055225
POF2	0.81	0.89	0.74	0.15	0.041923	0.045417
PF2	0.49	0.59	0.44	0.15	0.02707	0.03132
GeF3	0.85	0.97	0.76	0.21	0.043717	0.0466
SF3	0.7	0.8	0.63	0.17	0.042727	0.04791
SiF3	0.54	0.69	0.47	0.22	0.028988	0.032965
PF4	0.63	0.8	0.54	0.26	0.02845	0.030689
SF5	0.61	0.68	0.56	0.12	0.045057	0.046317
ONO2	0.55	0.7	0.48	0.22	0.0272	0.022896
N3	0.37	0.08	0.48	-0.4	0.01924	0.016837
B(OH)2	-0.01	0.12	-0.03	0.15	0.003947	0.007536
NHOH	-0.04	-0.34	0.11	-0.45	-0.001546	-0.009237
SO2NH2	0.53	0.6	0.49	0.11	0.031103	0.03417
PH2	0.06	0.05	0.09	-0.04	0.005142	0.003261
GeH3	0	0.01	0.03	-0.02	0.003826	0.004553
SiH3	0.05	0.1	0.06	0.04	0.0048	0.006433
CBr3	0.28	0.29	0.28	0.01	0.022058	0.024142
CClF2	0.42	0.46	0.4	0.06	0.026038	0.027898
5-chloro-1-tetrazolyl	0.6	0.61	0.58	0.03	0.039958	0.039699
N=CCl2	0.21	0.13	0.26	-0.13	0.014315	0.011662
CCl3	0.4	0.46	0.38	0.09	0.023264	0.025118
OCCl3	0.43	0.35	0.46	-0.11	0.024952	0.023134
N=NCF3	0.56	0.68	0.5	0.18	0.035509	0.042095
OCF3	0.38	0.35	0.39	-0.04	0.025767	0.02352
SOCF3	0.63	0.69	0.58	0.11	0.035433	0.036875
SeOCF3	0.81	0.83	0.76	0.07	0.034195	0.035248
SO2CF3	0.83	0.96	0.74	0.22	0.048723	0.053384
SeO2CF3	1.08	1.21	0.97	0.24	0.05403	0.057207
OSO2CF3	0.56	0.53	0.56	-0.03	0.031553	0.029282
SCF3	0.4	0.5	0.36	0.14	0.025155	0.027529
SeCF3	0.44	0.45	0.43	0.02	0.023635	0.025691
NC	0.48	0.49	0.47	0.02	0.031777	0.031549
NCO	0.27	0.19	0.31	-0.12	0.019154	0.015769
OCN	0.67	0.54	0.69	-0.15	0.038648	0.035103
SO2CN	1.1	1.26	0.97	0.29	0.055867	0.060125
NCS	0.48	0.38	0.51	-0.13	0.029154	0.027306
SCN	0.51	0.52	0.49	0.03	0.03333	0.034366
SeCN	0.61	0.66	0.57	0.09	0.031646	0.032636
N=NCN	0.71	1.03	0.56	0.47	0.046833	0.055601
N(O)=NCN	0.78	0.89	0.7	0.19	0.053584	0.058391
C(NO2)3	0.72	0.82	0.65	0.17	0.047449	0.051443
CHBr2	0.31	0.32	0.31	0.01	0.019331	0.020534
CHCl2	0.31	0.32	0.31	0.01	0.019638	0.020787
OCHCl2	0.38	0.26	0.43	-0.17	0.017365	0.015397
OCHF2	0.31	0.18	0.37	-0.19	0.014912	0.012756
SOCHF2	0.54	0.58	0.51	0.07	0.034489	0.034614
SO2CHF2	0.75	0.86	0.67	0.19	0.046438	0.050416
SCHF2	0.33	0.37	0.32	0.05	0.015631	0.017925
S(O)(=NH)CF3	0.72	0.84	0.64	0.2	0.038625	0.043124
NHSO2CF3	0.44	0.39	0.45	-0.06	0.025	0.022478
NHCN	0.21	0.06	0.28	-0.22	0.020635	0.012836
1-(1H)-tetrazolyl	0.52	0.5	0.52	-0.02	0.038607	0.036734
5-(1H)-tetrazolyl	0.64	0.56	0.65	-0.09	0.031403	0.032644
5-hydroxy-1-tetrazolyl	0.39	0.33	0.41	-0.08	0.030103	0.029278
OCH2Cl	0.25	0.08	0.33	-0.25	0.015243	0.010995
OCH2F	0.2	0.02	0.29	-0.27	0.0126	0.008515
SCH2F	0.23	0.2	0.25	-0.05	0.020954	0.022189
NHCHO	0.19	0	0.28	-0.28	0.008279	0.003539
CONH2	0.28	0.36	0.26	0.1	0.014843	0.01755
CSNH2	0.25	0.3	0.24	0.06	0.019646	0.022255
CH=NOH	0.22	0.1	0.28	-0.18	0.01	0.011568
N(O)=NCONH2	0.59	0.63	0.56	0.07	0.032606	0.035776
CH2SO2Me	0.15	0.17	0.16	0.01	0.005093	0.006083
SiMeCl2	0.31	0.39	0.29	0.1	0.016834	0.019666
SiMeF2	0.29	0.23	0.32	-0.09	0.014728	0.017812
NHCONH2	-0.03	-0.24	0.09	-0.33	-0.001702	-0.007712
N(Me)NO2	0.49	0.61	0.43	0.18	0.025797	0.025954
NHCSNH2	0.22	0.16	0.26	-0.1	0.005988	0.003948
SOMe	0.52	0.49	0.52	-0.03	0.02247	0.02203
S(OMe)	0.21	0.17	0.24	-0.07	0.010747	0.007564
OS(=O)Me	0.44	0.45	0.43	0.02	0.011172	0.008562
S(O)OMe	0.5	0.54	0.47	0.07	0.021581	0.023605
SO2Me	0.6	0.72	0.53	0.19	0.034169	0.037032
SSO2Me	0.43	0.54	0.38	0.16	0.027955	0.031148
OSO2Me	0.39	0.36	0.4	-0.04	0.024552	0.022348
SMe	0.15	0	0.23	-0.23	0.003147	-0.001784
SSMe	0.22	0.13	0.27	-0.14	0.014795	0.016536
SeMe	0.1	0	0.16	-0.16	0.003872	-0.000351
CH2NH2	-0.03	-0.11	0.04	-0.15	-0.004218	-0.004617
NHSO2Me	0.2	0.03	0.28	-0.25	0.013615	0.009252
N(COF)2	0.58	0.57	0.57	0	0.028067	0.027594
COCF3	0.63	0.8	0.54	0.26	0.034928	0.042268
SCOCF3	0.48	0.46	0.48	-0.02	0.026377	0.02753
OCOCF3	0.56	0.46	0.58	-0.12	0.028028	0.024662
N(CF3)C=O(F)	0.5	0.5	0.49	0.01	0.030639	0.030879
CF2CF3	0.47	0.52	0.44	0.08	0.027713	0.029984
OCF2CF3	0.48	0.28	0.55	-0.27	0.026552	0.024177
SO2CF2CF3	0.92	1.08	0.81	0.27	0.048971	0.053899
SCF2CF3	0.44	0.48	0.42	0.06	0.026199	0.028567
N(CF3)2	0.4	0.53	0.35	0.18	0.020335	0.015915
S(CF3)=NSO2CF3	1.18	1.28	1.07	0.21	0.059523	0.061311
SO(CF3)=NSO2CF3	1.23	1.4	1.09	0.31	0.063439	0.067368
N(SO2CF3)2	0.61	0.83	0.5	0.33	0.03818	0.040842
P(CF3)2	0.6	0.69	0.55	0.14	0.030734	0.0346
P(CN)2	0.82	0.9	0.75	0.15	0.041134	0.043726
OCF2CHFCl	0.35	0.28	0.38	-0.1	0.020361	0.018282
NHCOCF3	0.3	0.12	0.38	-0.26	0.021632	0.017585
CH=NSO2CF3	0.76	1	0.63	0.37	0.044054	0.050736
OCF2CHF2	0.34	0.25	0.38	-0.13	0.020805	0.0187
SCF2CHF2	0.38	0.47	0.35	0.12	0.021236	0.023749
C2N8S2H	0.63	0.64	0.6	0.04	0.040508	0.038278
SC≡CH	0.26	0.19	0.3	-0.11	0.018808	0.020414
SCH=CHCl	0.31	0.24	0.34	-0.1	0.021399	0.022603
SeCH=CHCl	0.28	0.26	0.3	-0.04	0.020254	0.021348
CH2CF3	0.12	0.09	0.15	-0.06	0.010498	0.009916
CH2SOCF3	0.25	0.24	0.27	-0.03	0.017156	0.017009
CH2SO2CF3	0.29	0.31	0.29	0.02	0.020242	0.021163
CH2SCF3	0.12	0.15	0.13	0.02	0.015529	0.015063
CH2CN	0.16	0.18	0.17	0.01	0.016293	0.014703
NHCOCH2Cl	0.17	-0.03	0.27	-0.3	0.009189	0.004839
N(Me)SO2CF3	0.46	0.44	0.46	-0.02	0.024842	0.024771
C(Me)(NO2)2	0.54	0.61	0.5	0.11	0.028952	0.031669
oxiranyl	0.05	0.03	0.09	-0.06	0.004829	0.003822
OCH=CH2	0.21	-0.09	0.34	-0.43	0.00848	0.001114
SCOMe	0.39	0.44	0.37	0.07	0.009711	0.011388
2-thiacylopropyl	0.04	0.01	0.08	-0.07	0.007141	0.006384
SCH=CH2	0.26	0.2	0.29	-0.09	0.015625	0.017105
SeCH=CH2	0.26	0.21	0.29	-0.08	0.014412	0.015784
1-aziridinyl	-0.07	-0.22	0.03	-0.25	-0.003968	-0.010404
2-aziridinyl	-0.06	-0.1	-0.01	-0.09	0.006596	0.004043
N-methyl-3-oxaziridinyl	0.09	0.12	0.1	0.02	0.006616	0.008163
NHCOOMe	-0.02	-0.17	0.07	-0.24	0.002096	-0.003646
CONHMe	0.35	0.36	0.35	0.01	0.011186	0.013052
CH=NOMe	0.37	0.3	0.4	-0.1	0.008416	0.01
CH2CONH2	0.06	0.07	0.08	-0.01	0.01718	0.015845
NHCSMe	0.24	0.12	0.3	-0.18	0.013839	0.010667
CSNHMe	0.3	0.34	0.29	0.05	0.019652	0.022265
CH=NNHCONHNH2	0.22	0.16	0.26	-0.1	-0.003232	-0.00165
CH(OH)Me	0.08	-0.07	0.16	-0.23	-0.0041	-0.004709
CH2OMe	0.08	0.01	0.13	-0.12	-0.001657	-0.000846
SO2Et	0.66	0.77	0.59	0.18	0.032635	0.03563
SEt	0.18	0.03	0.26	-0.23	0.007384	0.006749
P(Cl)NMe2	0.38	0.56	0.31	0.25	0.013541	0.015147
SiClMe2	0.16	0.21	0.16	0.05	0.008052	0.010308
SiFMe2	0.12	0.17	0.12	0.05	0.005591	0.008113
NHEt	-0.24	-0.61	-0.04	-0.57	-0.012393	-0.023176
N(Me)SO2Me	0.21	0.24	0.21	0.03	0.008975	0.00891
SO2NMe2	0.51	0.65	0.44	0.21	0.029606	0.033101
N(SO2Me)2	0.47	0.49	0.45	0.04	0.025226	0.027403
SN(Me)2	0.12	0.09	0.15	-0.06	-0.001423	-0.006112
N=NNMe2	-0.05	-0.03	-0.02	-0.01	-0.012362	-0.014355
P(O)Me2	0.43	0.5	0.4	0.1	0.015248	0.017341
PO(OMe)2	0.42	0.53	0.37	0.16	0.016442	0.021082
PMe2	0.03	0.06	0.05	0.01	0.000922	9e-05
SiH(Me)2	0.01	0.04	0.03	0.01	-0.001314	9.3e-05
CCCF3	0.41	0.51	0.37	0.14	0.029948	0.032622
CF=CFCF3	0.39	0.46	0.36	0.1	0.027713	0.030372
N=C(CF3)2	0.29	0.23	0.32	-0.09	0.025517	0.024468
CF2CF2CF3	0.44	0.48	0.42	0.06	0.027781	0.030206
CF(CF3)2	0.37	0.53	0.31	0.22	0.026791	0.027966
SO2CF2CF2CF3	0.92	1.09	0.81	0.28	0.049009	0.053944
SO2CF(CF3)2	0.92	1.1	0.8	0.3	0.049176	0.054183
SCF2CF2CF3	0.45	0.48	0.43	0.05	0.026439	0.028848
SCF(CF3)2	0.48	0.51	0.46	0.03	0.02765	0.029714
C(OH)(CF3)2	0.29	0.3	0.29	0.01	0.025677	0.026358
CH(SCF3)2	0.44	0.44	0.43	0.01	0.023109	0.022925
CH(CN)2	0.53	0.52	0.52	0	0.033238	0.032317
CH=CHCF3-c	0.16	0.17	0.18	-0.01	0.015378	0.018484
CH=CHCF3-t	0.24	0.27	0.24	0.03	0.020524	0.021701
CCMe	0.21	0.03	0.29	-0.26	0.003127	0.004023
N(Me)COCF3	0.41	0.39	0.41	-0.02	0.019377	0.018325
cyclopropyl	-0.07	-0.21	0.02	-0.23	-0.004919	-0.00803
C(Me)=CH2	0.09	0.05	0.13	-0.08	-0.000123	-0.000545
CH=CHMe	0.02	-0.09	0.09	-0.18	-0.002818	-0.003988
CH2CH=CH2	-0.11	-0.14	-0.06	-0.08	-0.000771	-0.002462
C(Et)(NO2)2	0.56	0.64	0.51	0.13	0.028831	0.031063
OCH2CH=CH2	0.09	-0.25	0.25	-0.5	0.001068	-0.006889
COEt	0.38	0.48	0.34	0.14	0.016765	0.021729
COOEt	0.37	0.45	0.34	0.11	0.012162	0.017144
CH2OCOMe	0.04	0.05	0.07	-0.02	0.008752	0.009316
CH2CH2COOH	-0.03	-0.07	0.02	-0.09	0.004271	0.002329
SCH2CH=CH2	0.19	0.12	0.23	-0.11	0.005091	0.000245
SeCH2CH=CH2	0.21	0.12	0.26	-0.14	0.010396	0.011365
CH2NHCOMe	0.05	-0.05	0.12	-0.17	0.014228	0.013499
NHCOOEt	0.11	-0.15	0.23	-0.38	0.001216	-0.00452
C(NO2)Me2	0.18	0.2	0.19	0.01	0.013593	0.013132
isopropyl	-0.04	-0.15	0.04	-0.19	-0.004816	-0.00684
Pr	-0.06	-0.13	0.01	-0.14	-0.004828	-0.006813
NHCONHEt	0.04	-0.26	0.19	-0.45	-0.005511	-0.011805
NHCSNHEt	0.3	0.07	0.4	-0.33	0.00123	-0.001192
OCHMe2	0.1	-0.45	0.34	-0.79	-0.003338	-0.011625
OPr	0.1	-0.25	0.26	-0.51	-0.002456	-0.010465
CH2CH(OH)Me	-0.12	-0.17	-0.06	-0.11	-0.00933	-0.010355
C(OOH)Me2	0.06	-0.14	0.17	-0.31	0.001059	0.001393
SCHMe2	0.23	0.07	0.3	-0.23	0.007438	0.007574
CH2NMe2	0	0.01	0.03	-0.02	-0.003708	-0.004286
GeMe3	0	0	0.03	-0.03	-0.00403	-0.003608
Si(Me)2OMe	0.04	-0.02	0.09	-0.11	-0.004214	-0.001597
OSiMe3	0.13	-0.27	0.31	-0.58	-0.00174	-0.00738
SiMe(OMe)2	0.04	0.1	0.05	0.05	-0.008077	-0.004451
Si(OMe)3	0.09	0.13	0.1	0.03	0.003282	0.006991
SiMe3	-0.04	-0.07	0.01	-0.08	-0.003762	-0.002637
cyclo-C4F7	0.48	0.53	0.45	0.08	0.024871	0.025582
COCF2CF2CF3	0.63	0.79	0.55	0.24	0.035329	0.04309
C(CF3)3	0.55	0.55	0.53	0.02	0.026622	0.028386
(CF2)3CF3	0.47	0.52	0.44	0.08	0.028035	0.030497
SO2C(CF3)3	0.96	1.13	0.84	0.29	0.051665	0.056993
SC(CF3)3	0.51	0.58	0.47	0.11	0.028552	0.031763
C(SCF3)3	0.51	0.53	0.49	0.04	0.032051	0.033079
SeC(CF3)3	0.49	0.54	0.46	0.08	0.028441	0.031383
C(CN)3	0.97	0.96	0.92	0.04	0.056468	0.057746
cyclo-1-(OH)C4F6	0.36	0.37	0.36	0.01	0.014363	0.01539
CH=C(CN)2	0.66	0.84	0.57	0.27	0.043477	0.049482
2-(5-bromofuryl)	0.15	0	0.23	-0.23	0.006592	0.005511
1-pyrroline-2,5-dione	0.305	0.244	0.317	-0.073	0.011413	0.011598
3-chloro-1-pyrrolidine-2,5-dione	0.387	0.359	0.387	-0.028	0.017621	0.017613
3-pyridazinyl	0.28	0.48	0.21	0.27	0.008144	0.009672
C(Me)(CN)2	0.6	0.57	0.59	-0.02	0.042499	0.047059
2-furyl	0.06	0.02	0.1	-0.08	0.001801	0.000783
2-thienyl	0.09	0.05	0.13	-0.08	0.004214	0.003285
3-thienyl	0.03	-0.02	0.08	-0.1	0.002099	0.000971
2-selenienyl	0.06	0.04	0.1	-0.06	0.00459	0.003726
1-pyrryl	0.47	0.37	0.5	-0.13	0.011141	0.005464
1-pyrrolidine-2,5-dione	0.298	0.257	0.303	-0.046	0.010426	0.010649
cyclobutyl	-0.05	-0.14	0.02	-0.16	-0.004466	-0.006148
COCHMe2	0.38	0.47	0.35	0.12	0.014695	0.019216
NHCOCH(Me)2	0.11	-0.1	0.21	-0.31	0.002793	-0.002044
CMe3	-0.1	-0.2	-0.02	-0.18	-0.005915	-0.007852
CH(Me)Et	-0.08	-0.12	-0.02	-0.1	-0.005225	-0.007263
CH2CH(Me)2	-0.07	-0.12	-0.01	-0.11	-0.004425	-0.006393
n-Bu	-0.08	-0.16	-0.01	-0.15	-0.005022	-0.007056
On-Bu	0.1	-0.32	0.29	-0.61	-0.002601	-0.010608
CH2C(OH)Me2	-0.16	-0.17	-0.11	-0.06	-0.00654	-0.007827
C(OMe)3	-0.03	-0.04	0.01	-0.05	0.003578	0.005064
AsEt2	0.22	0	0.32	-0.32	0.000881	0.001481
As(O)Et2	0.57	0.44	0.6	-0.16	0.014995	0.01652
As(S)Et2	0.52	0.44	0.54	-0.1	0.019363	0.020654
NH(CH2)3CH3	-0.34	-0.51	-0.21	-0.3	-0.012905	-0.023713
NEt2	-0.23	-0.6	-0.1	-0.5	-0.017257	-0.029231
PO(Et)2	0.37	0.47	0.33	0.14	0.013325	0.015343
N=NPO(OEt)2	0.16	0.74	-0.05	0.79	0.024275	0.030372
P(Et)2	0.1	0.13	0.11	0.02	0.002397	0.003563
P(S)Et2	0.39	0.46	0.36	0.1	0.018781	0.020776
CH2OSi(Me)3	-0.04	-0.05	0	-0.05	-0.003652	-0.003152
CH2Si(Me)3	-0.16	-0.21	-0.09	-0.12	-0.006915	-0.01053
PO(NMe2)2	0.3	0.4	0.27	0.13	0.010885	0.01393
P(NMe2)2	0.18	0.25	0.17	0.08	-0.000264	0.001611
C(CN)=C(CN)2	0.77	0.98	0.65	0.33	0.051841	0.056715
2-(5-cyanofuryl)	0.25	0.1	0.32	-0.22	0.020588	0.02068
3-pyridyl	0.23	0.25	0.24	0.01	0.009658	0.008968
4-pyridyl	0.27	0.44	0.21	0.23	0.014194	0.014045
2-(4,6-dimethyl-s-triazinyl)	0.25	0.39	0.21	0.18	0.007012	0.011868
1-cyclopentenyl	-0.06	-0.05	-0.03	-0.02	-0.003553	-0.00444
cyclopentyl	-0.05	-0.14	0.02	-0.16	-0.005558	-0.007513
COCMe3	0.27	0.32	0.26	0.06	0.012923	0.016518
NHCO2n-Bu	0.06	-0.05	0.13	-0.18	0.002639	-0.002171
CEt(Me)2	-0.06	-0.18	0.03	-0.21	-0.006581	-0.008499
CH2C(Me)3	-0.05	-0.17	0.03	-0.14	-0.00461	-0.00625
(CH2)4CH3	-0.08	-0.15	-0.01	-0.14	-0.005074	-0.007112
O(CH2)4CH3	0.1	-0.34	0.29	-0.63	0.002379	-0.001185
CH2PO(OEt)2	0.12	0.06	0.17	-0.11	0.003755	0.003389
CH2CH2SiMe3	-0.16	-0.17	-0.11	-0.06	-0.005659	-0.007908
Si(Me)2OSiMe3	0	-0.01	0.04	-0.05	-0.006214	-0.004582
C6Cl5	0.25	0.24	0.27	-0.03	0.01431	0.014081
C6F5	0.26	0.27	0.27	0	0.017965	0.018291
P(O)(C3F7)2	0.95	1.1	0.84	0.26	0.043345	0.048148
OP(O)(C3F7)2	0.66	0.56	0.67	-0.11	0.029993	0.025876
NHP(O)(C3F7)2	0.28	0.18	0.33	-0.15	0.021586	0.017006
CH2Mn(CO)5	-0.14	-0.44	0.02	-0.46	-0.00547	-0.009984
C6H2-2,4,6-(NO2)3	0.26	0.3	0.26	0.04	0.025882	0.025125
C6H4-3-Br	0.09	0.08	0.12	-0.04	0.008281	0.007612
C6H4-4-Br	0.15	0.12	0.18	-0.06	0.008447	0.007525
C6H4-3-Cl	0.15	0.1	0.19	-0.09	0.00815	0.007484
C6H4-4-Cl	0.15	0.12	0.18	-0.06	0.008121	0.007164
C6H4-3-F	0.15	0.1	0.19	-0.09	0.007528	0.006898
C6H4-4-F	0.12	0.06	0.17	-0.11	0.006533	0.005418
OC6H4-4-F	-0.08	-0.1	-0.03	-0.07	0.011942	0.008285
C6H4-3-NO2	0.21	0.2	0.23	-0.03	0.016422	0.015433
C6H4-4-NO2	0.25	0.26	0.26	0	0.022128	0.021714
SC6H4-4-NO2	0.32	0.24	0.36	-0.12	0.022194	0.022529
SOC6H4-4-NO2	0.58	0.6	0.55	0.05	0.035279	0.034943
2-benzotriazolyl	0.49	0.51	0.47	0.04	0.019856	0.020896
N(O)=NSO2Ph	0.69	0.79	0.62	0.17	0.041882	0.04605
N=NPh	0.32	0.39	0.3	0.09	0.010074	0.013499
OPh	0.25	-0.03	0.37	-0.4	0.00744	0.004183
SOPh	0.5	0.44	0.51	-0.07	0.01997	0.020085
2-(5-acetylfuryl)	0.24	0.08	0.31	-0.23	0.018493	0.018363
2-(6-methylpyronyl)	0.38	0.43	0.36	0.07	0.022578	0.02395
SO2Ph	0.62	0.68	0.5	0.1	0.029188	0.032331
OSO2Ph	0.36	0.33	0.37	-0.04	0.010913	0.009992
SPh	0.23	0.07	0.3	-0.23	0.008814	0.010119
NHPh	-0.02	-0.56	0.22	-0.78	-0.000597	-0.009119
NHSO2Ph	0.33	0.03	0.43	-0.4	0.016177	0.013904
SO2NHPh	0.56	0.65	0.51	0.14	0.033233	0.036196
2-(5-ethylfuryl)	0.09	-0.13	0.2	-0.33	-0.001615	-0.003012
1-(2,5-dimethylpyrryl)	0.49	0.38	0.52	-0.14	0.016166	0.015579
1-cyclohexenyl	-0.1	-0.08	-0.07	-0.01	-0.005557	-0.006864
cyclohexyl	-0.05	-0.15	0.03	-0.18	-0.005863	-0.007826
N(n-Pr)2	-0.26	-0.6	-0.14	-0.46	-0.017519	-0.029506
(CH2)4NMe2	-0.08	-0.16	-0.01	-0.15	-0.004181	-0.006225
PO(i-Pr)2	0.37	0.41	0.36	0.05	0.013603	0.015692
P(i-Pr)2	0.02	0.06	0.04	0.02	-0.00048	-0.00176
P(O)(OPr)2	0.38	0.5	0.33	0.17	0.014187	0.018838
Ge(Et)3	0	0	0.03	-0.03	-0.005675	-0.005332
Si(OEt)3	0.02	0.08	0.03	0.05	-0.009462	-0.00546
P(=NSO2CF3)(C3F7)2	1.24	1.37	1.11	0.26	0.058791	0.063522
Si(NMe2)3	-0.04	-0.04	0	-0.04	-0.005762	-0.003601
2-benzoxazolyl	0.3	0.33	0.3	0.04	0.013261	0.015082
2-benzthiazolyl	0.27	0.29	0.27	0.02	0.010518	0.011653
COPh	0.34	0.43	0.31	0.12	0.012696	0.018142
OCOPh	0.21	0.13	0.26	-0.13	0.008799	0.005995
COOPh	0.37	0.44	0.34	0.1	0.017117	0.022583
CH=NPh	0.35	0.42	0.33	0.09	0.008917	0.011971
NHCOPh	0.02	-0.19	0.13	-0.32	0.003519	-0.001081
CONHPh	0.23	0.41	0.17	0.24	0.017892	0.020056
C6H4-4-Me	0.06	-0.03	0.12	-0.15	-0.00109	-0.001867
CH2Ph	-0.08	-0.09	-0.04	-0.05	-0.002315	-0.004052
N=NPh-5-Me-2-OH	0.27	0.31	0.26	0.05	0.013806	0.016309
C6H4-4-OMe	0.05	-0.08	0.13	-0.21	-0.002065	-0.003178
CH(OH)Ph	0	-0.03	0.05	-0.08	0.006314	0.005956
CH2OPh	0.06	0.07	0.08	-0.01	0.004761	0.005479
CH2SO2Ph	0.15	0.16	0.17	-0.01	0.004168	0.005603
C(Et)3	-0.07	-0.2	0.02	-0.22	-0.007413	-0.009505
(CH2)6CH3	-0.07	-0.16	0	-0.16	-0.005189	-0.007228
SiMe(OSi(Me)3)2	-0.02	-0.01	0.01	-0.02	-0.003993	-0.001784
CF2CF2C6H4-4-F	0.34	0.39	0.32	0.07	0.017372	0.019633
C≡CPh	0.14	0.16	0.15	0.01	0.007953	0.009285
CH=NCOPh	0.39	0.51	0.34	0.17	0.022339	0.027192
CH=CHPh	0.03	-0.07	0.1	-0.17	0.002137	0.001595
CH2Fe(CO)2(pi-C5H5)	-0.26	-0.49	-0.11	-0.38	-0.010118	-0.013771
CH=NNHCOPh	0.39	0.51	0.34	0.17	0.009665	0.011542
NHCOC6H4-4-OMe	0.09	-0.06	0.17	-0.23	0.000134	-0.004458
SCH=NSO2C6H4-4-Me	0.65	0.7	0.61	0.09	0.03211	0.032821
C6H4-4-Et	0.07	-0.02	0.13	-0.15	-0.001056	-0.001793
CH2CH2Ph	-0.07	-0.12	-0.01	-0.11	-0.001548	-0.003588
SiPhMe2	0.04	0.07	0.06	0.01	-0.002954	-0.001337
S(Me)=NSO2C6H4-4-Me	0.65	0.7	0.61	0.09	0.030787	0.031184
PO(t-Bu)2	0.31	0.41	0.28	0.13	0.010444	0.013023
PO(n-Bu)2	0.35	0.49	0.3	0.19	0.012362	0.014373
PO(On-Bu)2	0.41	0.57	0.35	0.22	0.013951	0.018627
P(t-Bu)2	0.01	0.15	-0.01	0.16	0.001728	0.003473
C6H5Cr(CO)3	0.29	0.14	0.36	-0.22	0.017435	0.016752
2-benzo-4-thiopyronyl	0.34	0.35	0.34	0.01	0.02754	0.029913
2-benzothiopyronyl	0.48	0.45	0.48	-0.03	0.021167	0.02216
2-(benzo-1,4-pyronyl)	0.41	0.4	0.41	-0.01	0.022662	0.024629
C6H4-4-CHMe2	0.08	0.01	0.13	-0.12	-0.001119	-0.00186
Si(OSiMe3)3	-0.09	-0.01	-0.08	0.07	-0.005306	-0.002657
ferrocenyl	-0.15	-0.18	-0.09	-0.09	-0.001752	-0.003667
C6H4-4-CMe3	0.07	0.01	0.12	-0.11	-0.001287	-0.002007
1-dibenzarsenyl	0.19	0.13	0.23	-0.1	0.00323	0.004714
1-dibenzoarsoxyl	0.17	0.09	0.22	-0.13	0.016052	0.018865
1-dibenzoarsazinyl	0.14	0.09	0.18	-0.09	0.001221	0.002942
AsPh2	0.03	0.09	0.04	0.05	0.003183	0.004193
AsOPh2	0.54	0.64	0.49	0.15	0.016701	0.019353
PPh2BCl3	0.67	0.72	0.62	0.1	0.027044	0.030472
NPh2	0	-0.22	0.12	-0.34	0.001661	-0.002611
POPh2	0.38	0.53	0.32	0.21	0.013759	0.017248
PPh2	0.11	0.19	0.1	0.09	0.003953	0.00545
PSPh2	0.29	0.47	0.23	0.24	0.017749	0.021213
P(NPr2)-C6H4-3-F	0.2	0.24	0.2	0.04	0.00014	-0.000383
pyron-comp1	0.37	0.38	0.37	0.01	0.023292	0.024874
pyron-comp2	0.38	0.38	0.38	0	0.021613	0.023332
imidazole-comp1	0.17	0.21	0.17	0.04	0.005961	0.008189
CHPh2	-0.03	-0.05	0.01	-0.06	-0.00115	-0.002251
As-comp1	0.12	0.07	0.16	-0.09	-0.004044	-0.004189
POPh(Ph-4-Me)	0.13	0.3	0.09	0.21	0.012163	0.015746
CH2POPh2	0.14	0.01	0.21	-0.2	-0.004885	-0.005171
PS(Ph)(Ph-4-Me)	0.09	0.3	0.03	0.27	0.016143	0.019732
Si(Me)Ph2	0.1	0.13	0.11	0.02	-0.001411	0.000825
COOCHPh2	0.36	0.56	0.28	0.28	0.012876	0.018196
PO(Ph-4-Me)2	0.17	0.3	0.14	0.16	0.010539	0.014192
PS(Ph-4-Me)2	0.2	0.23	0.2	0.03	0.014406	0.018039
GePh3	0.05	0.08	0.07	0.01	-0.000444	0.001253
N=PPh3	-0.33	-0.77	-0.1	-0.67	-0.032895	-0.040014
SiPh3	-0.03	0.1	-0.04	0.14	-0.000938	0.001648
CPh3	-0.01	0.02	0.01	0.01	-0.001557	-0.001729
1-(1,2(BH)10-C2H)	0.49	0.43	0.5	-0.07	0.028266	0.027016
1-(1,7(BH)10-C2H)	0.25	0.33	0.23	0.1	0.014602	0.014438
2-(1,7(BH)10-C2H)	0.14	0.15	0.16	-0.01	0.011276	0.010932
4-(1,7(BH)10-C2H)	-0.02	0.02	0	0.02	-0.000633	0.000746
3-(1,2(BH)10-C2H)	0.2	0.19	0.22	-0.03	0.013127	0.013848
1-(1,2(BH)10-C2Me)	0.5	0.65	0.43	0.22	0.028905	0.030137
CH2-1-(1,2(BH)10-C2H)	0.12	0.12	0.14	-0.02	0.012531	0.010961
CH2-1-(1,7(BH)10-C2H)	0	0.01	0.03	-0.02	0.004121	0.002927
2-(methylcarbonyl)carboran-1-yl	0.4	0.63	0.31	0.32	0.018921	0.020438
2-((carbonyloxy)methyl)carboran-1-yl	0.7	0.74	0.66	0.08	0.029693	0.031727
CH2-1-(1,2(BH)10-C2Me)	0.1	0.11	0.12	-0.01	0.011075	0.009512
1-adamantyl	-0.12	-0.13	-0.07	-0.06	-0.007871	-0.009642

## Sheet: B3LYP_6-311++g(d,p)
Functional Groups	σ_m	σ_p	F	R	Δq_{C,m}	Δq_{C,p}	ΔV_{m}	ΔV_{p}
Refernece Values for H	0	0	0	0	-0.040282	-0.040282	-14.7727	-14.7727
H	0	0	0	0	0	0	0	0
Me	-0.07	-0.17	0.01	-0.18	-0.001308	-0.006113	-0.003338	-0.005185
CH=CH2	0.06	-0.04	0.13	-0.17	0.000922	0.000546	0.00193	0.001592
Ph	0.06	-0.01	0.12	-0.13	0.000582	-0.00138	0.001058	0.00019
OAc	0.39	0.31	0.42	-0.11	0.006373	-0.001352	0.007821	0.004129
NHCOCH3	0.21	0	0.31	-0.31	0.003102	-0.008643	0.002797	-0.00225
OMe	0.12	-0.27	0.29	-0.56	0.001056	-0.016139	-0.000243	-0.007965
OH	0.12	-0.37	0.33	-0.7	0.003284	-0.015099	0.003652	-0.004539
NH2	-0.16	-0.66	0.08	-0.74	-0.000788	-0.022299	-0.005169	-0.014305
F	0.34	0.06	0.45	-0.39	0.008433	-0.004811	0.014543	0.008103
Cl	0.37	0.23	0.42	-0.19	0.008285	0.001162	0.014896	0.011263
Br	0.39	0.23	0.45	-0.22	0.00847	0.002421	0.015201	0.012008
CHO	0.35	0.42	0.33	0.09	0.00726	0.018044	0.01824	0.021965
COMe	0.38	0.5	0.33	0.17	0.004317	0.013642	0.01216	0.01545
COOMe	0.37	0.45	0.34	0.11	0.004203	0.012857	0.009576	0.012964
COOH	0.37	0.45	0.34	0.11	0.005841	0.015748	0.013615	0.017391
COCl	0.51	0.61	0.46	0.15	0.010663	0.023704	0.025888	0.030396
CF3	0.43	0.54	0.38	0.16	0.010136	0.014097	0.021035	0.021883
CN	0.56	0.66	0.51	0.15	0.011795	0.017741	0.027063	0.028659
NO2	0.71	0.78	0.65	0.13	0.013985	0.022006	0.031727	0.033771
NHMe	-0.21	-0.7	0.03	-0.73	-0.002427	-0.024947	-0.008149	-0.01774
NMe2	-0.16	-0.6	0	-0.6	-0.003698	-0.025416	-0.010235	-0.019516
CHF2	0.29	0.32	0.29	0.03	0.00757	0.01105	0.015713	0.016495
COF	0.55	0.7	0.48	0.22	0.010234	0.022498	0.025081	0.029359
SH	0.25	0.15	0.3	-0.15	0.004823	-0.005841	0.007247	0.002319
NHNH2	-0.02	-0.55	0.22	-0.77	8.2e-05	-0.020725	-0.001234	-0.010569
NO	0.62	0.91	0.49	0.42	0.010642	0.024764	0.025959	0.030749
CH2F	0.12	0.11	0.15	-0.04	0.003933	0.007048	0.008489	0.009469
CH2Cl	0.11	0.12	0.13	-0.01	0.004372	0.005985	0.009211	0.009506
CH2Br	0.12	0.14	0.14	0	0.004504	0.006205	0.00963	0.009933
CH2OH	0	0	0.03	-0.03	-0.000929	-0.00536	-0.004366	-0.006095
Et	-0.07	-0.15	0	-0.15	-0.001546	-0.005556	-0.003405	-0.005001
OEt	0.1	-0.24	0.26	-0.5	0.000536	-0.016767	-0.001443	-0.009134
CCH	0.21	0.23	0.22	0.01	0.004292	0.005977	0.008491	0.009041
BF2	0.32	0.48	0.26	0.22	0.004868	0.018139	0.014073	0.019244
GeBr3	0.66	0.73	0.61	0.12	0.011781	0.016812	0.023626	0.024919
SiBr3	0.48	0.57	0.44	0.13	0.00936	0.016693	0.019173	0.021656
SO2Cl	1.2	1.11	1.16	-0.05	0.018664	0.025522	0.038646	0.040098
SCl	0.44	0.48	0.42	0.06	0.009232	0.019525	0.021704	0.025382
POCl2	0.78	0.9	0.7	0.2	0.015101	0.022052	0.0312	0.032867
PCl2	0.54	0.61	0.5	0.11	0.010454	0.018197	0.022471	0.024808
PSCl2	0.7	0.8	0.63	0.17	0.014114	0.019894	0.028819	0.030077
GeCl3	0.71	0.79	0.65	0.14	0.0127	0.018252	0.026058	0.027522
SiCl3	0.48	0.56	0.44	0.12	0.009671	0.017303	0.020286	0.022875
SOF	0.74	0.83	0.67	0.16	0.014239	0.019753	0.028913	0.029967
SO2F	0.8	0.91	0.72	0.19	0.018404	0.026049	0.038667	0.040478
POF2	0.81	0.89	0.74	0.15	0.015292	0.02245	0.032331	0.034164
PF2	0.49	0.59	0.44	0.15	0.009473	0.018315	0.020882	0.023765
GeF3	0.85	0.97	0.76	0.21	0.015402	0.022608	0.033126	0.03508
SF3	0.7	0.8	0.63	0.17	0.015496	0.025943	0.032672	0.035881
SiF3	0.54	0.69	0.47	0.22	0.010383	0.019051	0.022684	0.025688
PF4	0.63	0.8	0.54	0.26	0.009682	0.015244	0.021802	0.023176
SF5	0.61	0.68	0.56	0.12	0.017502	0.020061	0.034261	0.033884
ONO2	0.55	0.7	0.48	0.22	0.010351	0.001038	0.020415	0.015409
N3	0.37	0.08	0.48	-0.4	0.007252	0.002757	0.015575	0.012902
B(OH)2	-0.01	0.12	-0.03	0.15	0.000342	0.008065	0.002768	0.005824
NHOH	-0.04	-0.34	0.11	-0.45	0.001524	-0.015312	-0.000767	-0.008149
SO2NH2	0.53	0.6	0.49	0.11	0.012004	0.016	0.022288	0.023228
PH2	0.06	0.05	0.09	-0.04	0.002849	-0.001095	0.004593	0.002743
GeH3	0	0.01	0.03	-0.02	0.001913	0.003577	0.003514	0.004223
SiH3	0.05	0.1	0.06	0.04	0.002003	0.005517	0.00408	0.00558
CBr3	0.28	0.29	0.28	0.01	0.008477	0.012349	0.017073	0.017923
CClF2	0.42	0.46	0.4	0.06	0.010057	0.013462	0.020585	0.021203
5-chloro-1-tetrazolyl	0.6	0.61	0.58	0.03	0.013747	0.013956	0.030948	0.029663
N=CCl2	0.21	0.13	0.26	-0.13	0.006062	0.001074	0.012189	0.009421
CCl3	0.4	0.46	0.38	0.09	0.008947	0.012371	0.018071	0.018734
OCCl3	0.43	0.35	0.46	-0.11	0.009921	0.00653	0.020113	0.017626
N=NCF3	0.56	0.68	0.5	0.18	0.010912	0.022781	0.026724	0.030684
OCF3	0.38	0.35	0.39	-0.04	0.010691	0.006039	0.020937	0.018057
SOCF3	0.63	0.69	0.58	0.11	0.013454	0.016283	0.027229	0.027195
SeOCF3	0.81	0.83	0.76	0.07	0.013297	0.015815	0.026379	0.026313
SO2CF3	0.83	0.96	0.74	0.22	0.017234	0.026218	0.037007	0.039436
SeO2CF3	1.08	1.21	0.97	0.24	0.019186	0.025924	0.040389	0.041752
OSO2CF3	0.56	0.53	0.56	-0.03	0.013197	0.009554	0.025092	0.022572
SCF3	0.4	0.5	0.36	0.14	0.00926	0.014268	0.020065	0.021552
SeCF3	0.44	0.45	0.43	0.02	0.008986	0.013467	0.018992	0.020322
NC	0.48	0.49	0.47	0.02	0.011044	0.00968	0.024401	0.022864
NCO	0.27	0.19	0.31	-0.12	0.006849	-0.000284	0.014971	0.011256
OCN	0.67	0.54	0.69	-0.15	0.01558	0.009755	0.031048	0.027173
SO2CN	1.1	1.26	0.97	0.29	0.020018	0.029036	0.042953	0.045068
NCS	0.48	0.38	0.51	-0.13	0.008305	0.003854	0.018659	0.015941
SCN	0.51	0.52	0.49	0.03	0.012511	0.016222	0.026731	0.02727
SeCN	0.61	0.66	0.57	0.09	0.012091	0.015837	0.053035	0.045341
N=NCN	0.71	1.03	0.56	0.47	0.012874	0.027837	0.033151	0.03816
N(O)=NCN	0.78	0.89	0.7	0.19	0.016712	0.02557	0.039794	0.04186
C(NO2)3	0.72	0.82	0.65	0.17	0.01725	0.026943	0.040599	0.042386
CHBr2	0.31	0.32	0.31	0.01	0.007492	0.010146	0.015377	0.015812
CHCl2	0.31	0.32	0.31	0.01	0.007658	0.010114	0.015612	0.015976
OCHCl2	0.38	0.26	0.43	-0.17	0.008009	0.003752	0.014542	0.011968
OCHF2	0.31	0.18	0.37	-0.19	0.007776	0.002298	0.012642	0.0098
SOCHF2	0.54	0.58	0.51	0.07	0.012449	0.013282	0.026759	0.025789
SO2CHF2	0.75	0.86	0.67	0.19	0.015644	0.023619	0.034644	0.03672
SCHF2	0.33	0.37	0.32	0.05	0.007394	0.011245	0.013252	0.014581
S(O)(=NH)CF3	0.72	0.84	0.64	0.2	0.015175	0.022991	0.030223	0.032507
NHSO2CF3	0.44	0.39	0.45	-0.06	0.010599	0.004689	0.020174	0.016715
NHCN	0.21	0.06	0.28	-0.22	0.00914	-0.006421	0.016846	0.009296
1-(1H)-tetrazolyl	0.52	0.5	0.52	-0.02	0.013017	0.009716	0.029559	0.026812
5-(1H)-tetrazolyl	0.64	0.56	0.65	-0.09	0.009645	0.013216	0.023934	0.024355
5-hydroxy-1-tetrazolyl	0.39	0.33	0.41	-0.08	0.010899	0.007043	0.022091	0.019622
OCH2Cl	0.25	0.08	0.33	-0.25	0.007132	-0.000984	0.012345	0.008153
OCH2F	0.2	0.02	0.29	-0.27	0.005268	-0.007869	0.008242	0.002156
SCH2F	0.23	0.2	0.25	-0.05	0.005384	0.003518	0.010691	0.009702
NHCHO	0.19	0	0.28	-0.28	0.004737	-0.006306	0.006973	0.002035
CONH2	0.28	0.36	0.26	0.1	0.0047	0.010043	0.011227	0.012941
CSNH2	0.25	0.3	0.24	0.06	0.005583	0.010396	0.013258	0.014731
CH=NOH	0.22	0.1	0.28	-0.18	0.003289	0.005312	0.006925	0.007523
N(O)=NCONH2	0.59	0.63	0.56	0.07	0.011538	0.016745	0.024684	0.025877
CH2SO2Me	0.15	0.17	0.16	0.01	0.005872	0.007202	0.006167	0.006693
SiMeCl2	0.31	0.39	0.29	0.1	0.005914	0.012012	0.012748	0.015005
SiMeF2	0.29	0.23	0.32	-0.09	0.005354	0.01175	0.011638	0.014122
NHCONH2	-0.03	-0.24	0.09	-0.33	0.002348	-0.011711	0.000114	-0.005802
N(Me)NO2	0.49	0.61	0.43	0.18	0.009523	0.011046	0.019363	0.019181
NHCSNH2	0.22	0.16	0.26	-0.1	0.004364	-0.003655	0.005492	0.001693
SOMe	0.52	0.49	0.52	-0.03	0.008236	0.007036	0.016657	0.015287
S(OMe)	0.21	0.17	0.24	-0.07	0.004682	-0.001926	0.008356	0.005159
OS(=O)Me	0.44	0.45	0.43	0.02	0.005427	-0.002381	0.007977	0.004433
S(O)OMe	0.5	0.54	0.47	0.07	0.009669	0.012402	0.016533	0.016993
SO2Me	0.6	0.72	0.53	0.19	0.011824	0.016908	0.025513	0.026753
SSO2Me	0.43	0.54	0.38	0.16	0.008462	0.013647	0.020636	0.022334
OSO2Me	0.39	0.36	0.4	-0.04	0.008184	0.002523	0.018175	0.015077
SMe	0.15	0	0.23	-0.23	0.002645	0.00423	0.006781	0.0073
SSMe	0.22	0.13	0.27	-0.14	0.004438	-0.000288	0.008306	0.005989
SeMe	0.1	0	0.16	-0.16	0.002822	0.004328	0.00666	0.007211
CH2NH2	-0.03	-0.11	0.04	-0.15	-0.002022	-0.004598	-0.004712	-0.005538
NHSO2Me	0.2	0.03	0.28	-0.25	0.006246	-0.004049	0.014817	0.009932
N(COF)2	0.58	0.57	0.57	0	0.014923	0.015653	0.025267	0.02449
COCF3	0.63	0.8	0.54	0.26	0.010901	0.024878	0.026218	0.031153
SCOCF3	0.48	0.46	0.48	-0.02	0.011593	0.015174	0.021904	0.022531
OCOCF3	0.56	0.46	0.58	-0.12	0.012582	0.006355	0.023306	0.019561
N(CF3)C=O(F)	0.5	0.5	0.49	0.01	0.013701	0.015566	0.025851	0.025599
CF2CF3	0.47	0.52	0.44	0.08	0.010505	0.015284	0.022227	0.023344
OCF2CF3	0.48	0.28	0.55	-0.27	0.01123	0.006523	0.022088	0.019128
SO2CF2CF3	0.92	1.08	0.81	0.27	0.01745	0.026949	0.037491	0.040097
SCF2CF3	0.44	0.48	0.42	0.06	0.009823	0.014987	0.021235	0.022725
N(CF3)2	0.4	0.53	0.35	0.18	0.011494	0.014399	0.023758	0.024131
S(CF3)=NSO2CF3	1.18	1.28	1.07	0.21	0.021417	0.012851	0.045071	0.045626
SO(CF3)=NSO2CF3	1.23	1.4	1.09	0.31	0.02155	0.030699	0.04753	0.04958
N(SO2CF3)2	0.61	0.83	0.5	0.33	0.015567	0.021585	0.030282	0.031665
P(CF3)2	0.6	0.69	0.55	0.14	0.011284	0.020032	0.024533	0.027401
P(CN)2	0.82	0.9	0.75	0.15	0.014994	0.022699	0.032931	0.034971
OCF2CHFCl	0.35	0.28	0.38	-0.1	0.009616	0.004445	0.017258	0.01436
NHCOCF3	0.3	0.12	0.38	-0.26	0.008636	0.000271	0.017437	0.013115
CH=NSO2CF3	0.76	1	0.63	0.37	0.012653	0.026328	0.032558	0.037013
OCF2CHF2	0.34	0.25	0.38	-0.13	0.00975	0.004589	0.017633	0.014718
SCF2CHF2	0.38	0.47	0.35	0.12	0.008386	0.012886	0.017119	0.018568
C2N8S2H	0.63	0.64	0.6	0.04	0.013989	0.014881	0.025805	0.025378
SC≡CH	0.26	0.19	0.3	-0.11	0.007405	0.009691	0.014462	0.015058
SCH=CHCl	0.31	0.24	0.34	-0.1	0.006837	0.009639	0.016779	0.017432
SeCH=CHCl	0.28	0.26	0.3	-0.04	0.006672	0.009336	0.015982	0.016639
CH2CF3	0.12	0.09	0.15	-0.06	0.004673	0.004474	0.00954	0.009097
CH2SOCF3	0.25	0.24	0.27	-0.03	0.006714	0.007621	0.014517	0.014459
CH2SO2CF3	0.29	0.31	0.29	0.02	0.009248	0.012041	0.017702	0.018293
CH2SCF3	0.12	0.15	0.13	0.02	0.005116	0.005759	0.013127	0.012792
CH2CN	0.16	0.18	0.17	0.01	0.006903	0.00559	0.014155	0.01295
NHCOCH2Cl	0.17	-0.03	0.27	-0.3	0.005136	-0.005034	0.007823	0.003231
N(Me)SO2CF3	0.46	0.44	0.46	-0.02	0.008969	0.00854	0.019	0.018027
C(Me)(NO2)2	0.54	0.61	0.5	0.11	0.00896	0.016716	0.022701	0.024847
oxiranyl	0.05	0.03	0.09	-0.06	0.001952	-0.000709	0.003493	0.002171
OCH=CH2	0.21	-0.09	0.34	-0.43	0.0048	-0.011044	0.006927	-0.000493
SCOMe	0.39	0.44	0.37	0.07	0.006843	0.009128	0.008483	0.009197
2-thiacylopropyl	0.04	0.01	0.08	-0.07	0.002253	0.000423	0.004855	0.003772
SCH=CH2	0.26	0.2	0.29	-0.09	0.004918	0.007059	0.011686	0.012343
SeCH=CH2	0.26	0.21	0.29	-0.08	0.004723	0.006708	0.010825	0.011483
1-aziridinyl	-0.07	-0.22	0.03	-0.25	-0.00057	-0.014698	-0.002687	-0.008844
2-aziridinyl	-0.06	-0.1	-0.01	-0.09	0.002076	-0.002443	0.005107	0.002676
N-methyl-3-oxaziridinyl	0.09	0.12	0.1	0.02	0.002757	0.005157	0.004987	0.005778
NHCOOMe	-0.02	-0.17	0.07	-0.24	0.003196	-0.010538	0.002098	-0.003788
CONHMe	0.35	0.36	0.35	0.01	0.003551	0.007093	0.008383	0.009628
CH=NOMe	0.37	0.3	0.4	-0.1	0.002712	0.00441	0.005425	0.005948
CH2CONH2	0.06	0.07	0.08	-0.01	0.001933	-9.1e-05	0.011877	0.010717
NHCSMe	0.24	0.12	0.3	-0.18	0.00544	-0.003219	0.009047	0.004913
CSNHMe	0.3	0.34	0.29	0.05	0.005583	0.010397	0.013261	0.014733
CH=NNHCONHNH2	0.22	0.16	0.26	-0.1	0.000393	0.001565	-0.001934	-0.001275
CH(OH)Me	0.08	-0.07	0.16	-0.23	-0.000704	-0.003855	-0.003756	-0.004914
CH2OMe	0.08	0.01	0.13	-0.12	0.000579	0.001325	-0.000883	-0.000484
SO2Et	0.66	0.77	0.59	0.18	0.011304	0.016348	0.023965	0.025246
SEt	0.18	0.03	0.26	-0.23	0.0026	0.00185	0.005892	0.005492
P(Cl)NMe2	0.38	0.56	0.31	0.25	0.004414	0.006219	0.009015	0.009658
SiClMe2	0.16	0.21	0.16	0.05	0.00267	0.007631	0.005832	0.007749
SiFMe2	0.12	0.17	0.12	0.05	0.001379	0.005135	0.003036	0.004668
NHEt	-0.24	-0.61	-0.04	-0.57	-0.002698	-0.025063	-0.008767	-0.018245
N(Me)SO2Me	0.21	0.24	0.21	0.03	0.006588	0.00658	0.008487	0.008178
SO2NMe2	0.51	0.65	0.44	0.21	0.010617	0.015676	0.021682	0.023147
N(SO2Me)2	0.47	0.49	0.45	0.04	0.009776	0.013605	0.018197	0.019455
SN(Me)2	0.12	0.09	0.15	-0.06	0.001552	-0.009815	-0.000831	-0.005774
N=NNMe2	-0.05	-0.03	-0.02	-0.01	-0.002017	-0.0071	-0.006976	-0.008927
P(O)Me2	0.43	0.5	0.4	0.1	0.004783	0.008868	0.01107	0.012413
PO(OMe)2	0.42	0.53	0.37	0.16	0.00581	0.012644	0.011249	0.014059
PMe2	0.03	0.06	0.05	0.01	0.000598	0.003098	0.002267	0.003241
SiH(Me)2	0.01	0.04	0.03	0.01	-0.000495	0.002504	-0.000906	0.000534
CCCF3	0.41	0.51	0.37	0.14	0.009769	0.015133	0.023422	0.024833
CF=CFCF3	0.39	0.46	0.36	0.1	0.009112	0.014776	0.021722	0.023203
N=C(CF3)2	0.29	0.23	0.32	-0.09	0.010022	0.00872	0.021176	0.019668
CF2CF2CF3	0.44	0.48	0.42	0.06	0.010622	0.015929	0.022663	0.023949
CF(CF3)2	0.37	0.53	0.31	0.22	0.010942	0.013634	0.021701	0.021953
SO2CF2CF2CF3	0.92	1.09	0.81	0.28	0.017361	0.026916	0.03754	0.040155
SO2CF(CF3)2	0.92	1.1	0.8	0.3	0.017418	0.027305	0.037511	0.040231
SCF2CF2CF3	0.45	0.48	0.43	0.05	0.009812	0.015123	0.021546	0.023078
SCF(CF3)2	0.48	0.51	0.46	0.03	0.010795	0.015445	0.022408	0.023633
C(OH)(CF3)2	0.29	0.3	0.29	0.01	0.009179	0.01194	0.019643	0.019837
CH(SCF3)2	0.44	0.44	0.43	0.01	0.010986	0.01002	0.022387	0.021151
CH(CN)2	0.53	0.52	0.52	0	0.013432	0.014122	0.027906	0.027027
CH=CHCF3-c	0.16	0.17	0.18	-0.01	0.005695	0.011962	0.012703	0.014984
CH=CHCF3-t	0.24	0.27	0.24	0.03	0.006276	0.010039	0.016663	0.017428
CCMe	0.21	0.03	0.29	-0.26	0.001632	0.001238	0.002166	0.002081
N(Me)COCF3	0.41	0.39	0.41	-0.02	0.008967	0.008152	0.01644	0.015352
cyclopropyl	-0.07	-0.21	0.02	-0.23	-0.001153	-0.007671	-0.003557	-0.006306
C(Me)=CH2	0.09	0.05	0.13	-0.08	-0.000201	-0.001477	-0.00024	-0.000826
CH=CHMe	0.02	-0.09	0.09	-0.18	-0.000544	-0.003136	-0.001785	-0.002911
CH2CH=CH2	-0.11	-0.14	-0.06	-0.08	-0.000145	-0.003785	-0.000544	-0.001983
C(Et)(NO2)2	0.56	0.64	0.51	0.13	0.0109	0.01659	0.02303	0.024301
OCH2CH=CH2	0.09	-0.25	0.25	-0.5	0.001612	-0.015189	0.001176	-0.006452
COEt	0.38	0.48	0.34	0.14	0.004166	0.013521	0.011527	0.014917
COOEt	0.37	0.45	0.34	0.11	0.003782	0.012222	0.008565	0.011898
CH2OCOMe	0.04	0.05	0.07	-0.02	0.002792	0.004123	0.006655	0.006974
CH2CH2COOH	-0.03	-0.07	0.02	-0.09	0.001159	-0.001712	0.003975	0.002538
SCH2CH=CH2	0.19	0.12	0.23	-0.11	0.003023	-0.007715	0.004	-0.001014
SeCH2CH=CH2	0.21	0.12	0.26	-0.14	0.003064	0.004744	0.007486	0.008069
CH2NHCOMe	0.05	-0.05	0.12	-0.17	0.001048	-0.000499	0.004958	0.004069
NHCOOEt	0.11	-0.15	0.23	-0.38	0.002916	-0.010924	0.001383	-0.00451
C(NO2)Me2	0.18	0.2	0.19	0.01	0.006021	0.006155	0.011708	0.011113
isopropyl	-0.04	-0.15	0.04	-0.19	-0.00161	-0.005706	-0.003672	-0.005286
Pr	-0.06	-0.13	0.01	-0.14	-0.001683	-0.005656	-0.003679	-0.005253
NHCONHEt	0.04	-0.26	0.19	-0.45	0.001155	-0.013842	-0.003038	-0.009202
NHCSNHEt	0.3	0.07	0.4	-0.33	0.002729	-0.006203	0.001026	-0.002971
OCHMe2	0.1	-0.45	0.34	-0.79	0.00012	-0.017987	-0.002413	-0.010363
OPr	0.1	-0.25	0.26	-0.51	0.000404	-0.016992	-0.001846	-0.009554
CH2CH(OH)Me	-0.12	-0.17	-0.06	-0.11	-0.003017	-0.005828	-0.007696	-0.008343
C(OOH)Me2	0.06	-0.14	0.17	-0.31	0.000404	-3.2e-05	0.000108	-0.000114
SCHMe2	0.23	0.07	0.3	-0.23	0.002365	0.001985	0.005416	0.005221
CH2NMe2	0	0.01	0.03	-0.02	-0.001401	-0.004036	-0.003394	-0.004189
GeMe3	0	0	0.03	-0.03	-0.001339	-0.000212	-0.002809	-0.002167
Si(Me)2OMe	0.04	-0.02	0.09	-0.11	-0.000229	0.004184	-0.002693	-0.000544
OSiMe3	0.13	-0.27	0.31	-0.58	0.000298	-0.013043	-0.001008	-0.006648
SiMe(OMe)2	0.04	0.1	0.05	0.05	-0.001254	0.003556	-0.006038	-0.003345
Si(OMe)3	0.09	0.13	0.1	0.03	-7.5e-05	0.005508	0.001	0.003738
SiMe3	-0.04	-0.07	0.01	-0.08	-0.001487	0.0012	-0.002789	-0.001487
cyclo-C4F7	0.48	0.53	0.45	0.08	0.009968	0.012287	0.020511	0.020553
COCF2CF2CF3	0.63	0.79	0.55	0.24	0.010835	0.025976	0.026615	0.032027
C(CF3)3	0.55	0.55	0.53	0.02	0.010329	0.014625	0.021368	0.022188
(CF2)3CF3	0.47	0.52	0.44	0.08	0.010599	0.016065	0.022961	0.024287
SO2C(CF3)3	0.96	1.13	0.84	0.29	0.018314	0.028825	0.039255	0.042134
SC(CF3)3	0.51	0.58	0.47	0.11	0.009978	0.01726	0.022695	0.024992
C(SCF3)3	0.51	0.53	0.49	0.04	0.011781	0.016832	0.026293	0.027237
SeC(CF3)3	0.49	0.54	0.46	0.08	0.010212	0.017108	0.022602	0.02477
C(CN)3	0.97	0.96	0.92	0.04	0.016585	0.022127	0.04159	0.042132
cyclo-1-(OH)C4F6	0.36	0.37	0.36	0.01	0.006878	0.008973	0.012602	0.012923
CH=C(CN)2	0.66	0.84	0.57	0.27	0.012636	0.025188	0.032203	0.036335
2-(5-bromofuryl)	0.15	0	0.23	-0.23	0.00307	0.000449	0.005765	0.004342
1-pyrroline-2,5-dione	0.305	0.244	0.317	-0.073	0.006742	0.003791	0.00816	0.0067
3-chloro-1-pyrrolidine-2,5-dione	0.387	0.359	0.387	-0.028	0.008901	0.007903	0.012913	0.012026
3-pyridazinyl	0.28	0.48	0.21	0.27	0.003265	0.005895	0.006414	0.007322
C(Me)(CN)2	0.6	0.57	0.59	-0.02	0.014533	0.024157	0.023498	0.022192
2-furyl	0.06	0.02	0.1	-0.08	0.001502	-0.00154	0.001713	0.000304
2-thienyl	0.09	0.05	0.13	-0.08	0.002355	-0.00032	0.00374	0.002508
3-thienyl	0.03	-0.02	0.08	-0.1	0.000886	-0.001752	0.001839	0.000653
2-selenienyl	0.06	0.04	0.1	-0.06	0.002381	-0.000113	0.004037	0.00287
1-pyrryl	0.47	0.37	0.5	-0.13	0.004843	-0.006974	0.008521	0.00268
1-pyrrolidine-2,5-dione	0.298	0.257	0.303	-0.046	0.006859	0.005218	0.007422	0.006538
cyclobutyl	-0.05	-0.14	0.02	-0.16	-0.001619	-0.004872	-0.003393	-0.004744
COCHMe2	0.38	0.47	0.35	0.12	0.003453	0.013033	0.010037	0.013579
NHCOCH(Me)2	0.11	-0.1	0.21	-0.31	0.002864	-0.008978	0.0022	-0.00285
CMe3	-0.1	-0.2	-0.02	-0.18	-0.002353	-0.005925	-0.004663	-0.006184
CH(Me)Et	-0.08	-0.12	-0.02	-0.1	-0.001739	-0.005933	-0.004021	-0.005642
CH2CH(Me)2	-0.07	-0.12	-0.01	-0.11	-0.001515	-0.005581	-0.003327	-0.004842
n-Bu	-0.08	-0.16	-0.01	-0.15	-0.001715	-0.005795	-0.003836	-0.005452
On-Bu	0.1	-0.32	0.29	-0.61	0.00034	-0.017092	-0.002029	-0.00974
CH2C(OH)Me2	-0.16	-0.17	-0.11	-0.06	-0.001657	-0.004544	-0.005228	-0.005982
C(OMe)3	-0.03	-0.04	0.01	-0.05	0.000272	0.000808	0.001517	0.002073
AsEt2	0.22	0	0.32	-0.32	-0.000116	0.000814	0.000359	0.000769
As(O)Et2	0.57	0.44	0.6	-0.16	0.004963	0.007538	0.010585	0.011398
As(S)Et2	0.52	0.44	0.54	-0.1	0.00592	0.00858	0.01299	0.013659
NH(CH2)3CH3	-0.34	-0.51	-0.21	-0.3	-0.002909	-0.025461	-0.009386	-0.018912
NEt2	-0.23	-0.6	-0.1	-0.5	-0.004506	-0.028565	-0.0118	-0.021996
PO(Et)2	0.37	0.47	0.33	0.14	0.004181	0.007668	0.009326	0.010538
N=NPO(OEt)2	0.16	0.74	-0.05	0.79	0.007859	0.017288	0.017098	0.02036
P(Et)2	0.1	0.13	0.11	0.02	0.000153	0.002233	0.00129	0.00218
P(S)Et2	0.39	0.46	0.36	0.1	0.005472	0.009375	0.012431	0.013631
CH2OSi(Me)3	-0.04	-0.05	0	-0.05	-8.5e-05	-0.000104	-0.002247	-0.002104
CH2Si(Me)3	-0.16	-0.21	-0.09	-0.12	-0.001982	-0.00967	-0.004954	-0.007805
PO(NMe2)2	0.3	0.4	0.27	0.13	0.002672	0.007144	0.006894	0.008852
P(NMe2)2	0.18	0.25	0.17	0.08	-0.000424	0.002	-0.000681	0.000468
C(CN)=C(CN)2	0.77	0.98	0.65	0.33	0.01721	0.028434	0.039596	0.042944
2-(5-cyanofuryl)	0.25	0.1	0.32	-0.22	0.006622	0.007789	0.016398	0.016086
3-pyridyl	0.23	0.25	0.24	0.01	0.002835	0.00173	0.007224	0.00642
4-pyridyl	0.27	0.44	0.21	0.23	0.003643	0.003892	0.010089	0.00972
2-(4,6-dimethyl-s-triazinyl)	0.25	0.39	0.21	0.18	0.002164	0.010339	0.004536	0.007979
1-cyclopentenyl	-0.06	-0.05	-0.03	-0.02	-0.0013	-0.003344	-0.002562	-0.003434
cyclopentyl	-0.05	-0.14	0.02	-0.16	-0.001941	-0.005859	-0.004295	-0.005866
COCMe3	0.27	0.32	0.26	0.06	0.003156	0.01126	0.009017	0.011977
NHCO2n-Bu	0.06	-0.05	0.13	-0.18	0.002822	-0.009126	0.001958	-0.003125
CEt(Me)2	-0.06	-0.18	0.03	-0.21	-0.002614	-0.006147	-0.005219	-0.006709
CH2C(Me)3	-0.05	-0.17	0.03	-0.14	-0.001886	-0.005257	-0.003497	-0.004666
(CH2)4CH3	-0.08	-0.15	-0.01	-0.14	-0.00174	-0.00583	-0.003891	-0.005512
O(CH2)4CH3	0.1	-0.34	0.29	-0.63	0.001214	-0.00721	0.001608	-0.002251
CH2PO(OEt)2	0.12	0.06	0.17	-0.11	0.001975	-0.001292	0.001182	0.000564
CH2CH2SiMe3	-0.16	-0.17	-0.11	-0.06	-0.001887	-0.006344	-0.004214	-0.005973
Si(Me)2OSiMe3	0	-0.01	0.04	-0.05	-0.00191	0.001015	-0.004367	-0.002858
C6Cl5	0.25	0.24	0.27	-0.03	0.00637	0.006522	0.012062	0.011737
C6F5	0.26	0.27	0.27	0	0.007147	0.009352	0.015311	0.015633
P(O)(C3F7)2	0.95	1.1	0.84	0.26	0.015656	0.025681	0.033448	0.036448
OP(O)(C3F7)2	0.66	0.56	0.67	-0.11	0.013541	0.004815	0.025057	0.02036
NHP(O)(C3F7)2	0.28	0.18	0.33	-0.15	0.010141	-5.3e-05	0.018196	0.01318
CH2Mn(CO)5	-0.14	-0.44	0.02	-0.46	-0.000521	-0.00765	-0.001467	-0.004573
C6H2-2,4,6-(NO2)3	0.26	0.3	0.26	0.04	0.015825	0.018185	0.026067	0.025819
C6H4-3-Br	0.09	0.08	0.12	-0.04	0.002672	0.001608	0.006635	0.005878
C6H4-4-Br	0.15	0.12	0.18	-0.06	0.002233	0.00086	0.006509	0.005606
C6H4-3-Cl	0.15	0.1	0.19	-0.09	0.002588	0.001507	0.00647	0.005712
C6H4-4-Cl	0.15	0.12	0.18	-0.06	0.002104	0.000627	0.006195	0.005262
C6H4-3-F	0.15	0.1	0.19	-0.09	0.002374	0.001259	0.005965	0.005215
C6H4-4-F	0.12	0.06	0.17	-0.11	0.001624	-0.000302	0.004972	0.003906
OC6H4-4-F	-0.08	-0.1	-0.03	-0.07	0.005205	-0.00254	0.009829	0.005931
C6H4-3-NO2	0.21	0.2	0.23	-0.03	0.005037	0.004948	0.013539	0.012843
C6H4-4-NO2	0.25	0.26	0.26	0	0.005406	0.006455	0.016557	0.016192
SC6H4-4-NO2	0.32	0.24	0.36	-0.12	0.006834	0.009342	0.017918	0.018205
SOC6H4-4-NO2	0.58	0.6	0.55	0.05	0.012165	0.012678	0.027065	0.025841
2-benzotriazolyl	0.49	0.51	0.47	0.04	0.01019	0.010659	0.016959	0.016548
N(O)=NSO2Ph	0.69	0.79	0.62	0.17	0.014066	0.020915	0.030617	0.03228
N=NPh	0.32	0.39	0.3	0.09	0.003599	0.00878	0.007502	0.009301
OPh	0.25	-0.03	0.37	-0.4	0.004235	-0.003792	0.006123	0.002331
SOPh	0.5	0.44	0.51	-0.07	0.008638	0.007606	0.014711	0.013525
2-(5-acetylfuryl)	0.24	0.08	0.31	-0.23	0.004887	0.005134	0.013101	0.012488
2-(6-methylpyronyl)	0.38	0.43	0.36	0.07	0.006204	0.009442	0.015668	0.016297
SO2Ph	0.62	0.68	0.5	0.1	0.011355	0.015952	0.021633	0.022836
OSO2Ph	0.36	0.33	0.37	-0.04	0.007699	0.003069	0.009239	0.006994
SPh	0.23	0.07	0.3	-0.23	0.003681	0.00501	0.006532	0.006988
NHPh	-0.02	-0.56	0.22	-0.78	0.000827	-0.016423	2.5e-05	-0.007569
NHSO2Ph	0.33	0.03	0.43	-0.4	0.005304	-0.002562	0.011435	0.00783
SO2NHPh	0.56	0.65	0.51	0.14	0.012007	0.016211	0.024094	0.0251
2-(5-ethylfuryl)	0.09	-0.13	0.2	-0.33	0.000386	-0.00368	-0.000983	-0.002722
1-(2,5-dimethylpyrryl)	0.49	0.38	0.52	-0.14	0.005041	0.00336	0.011623	0.010564
1-cyclohexenyl	-0.1	-0.08	-0.07	-0.01	-0.001889	-0.004995	-0.004227	-0.00542
cyclohexyl	-0.05	-0.15	0.03	-0.18	-0.001984	-0.005984	-0.004543	-0.006103
N(n-Pr)2	-0.26	-0.6	-0.14	-0.46	-0.00466	-0.028835	-0.012179	-0.022404
(CH2)4NMe2	-0.08	-0.16	-0.01	-0.15	-0.001548	-0.00551	-0.003205	-0.004803
PO(i-Pr)2	0.37	0.41	0.36	0.05	0.003325	0.007415	0.007583	0.009176
P(i-Pr)2	0.02	0.06	0.04	0.02	0.000132	-0.002835	-0.000386	-0.001597
P(O)(OPr)2	0.38	0.5	0.33	0.17	0.005003	0.011456	0.009151	0.011893
Ge(Et)3	0	0	0.03	-0.03	-0.00194	-0.001126	-0.004168	-0.003577
Si(OEt)3	0.02	0.08	0.03	0.05	-0.000785	0.004657	-0.003591	-0.000752
P(=NSO2CF3)(C3F7)2	1.24	1.37	1.11	0.26	0.019032	0.030555	0.043297	0.046467
Si(NMe2)3	-0.04	-0.04	0	-0.04	-0.002402	0.001339	-0.004428	-0.002378
2-benzoxazolyl	0.3	0.33	0.3	0.04	0.006725	0.008921	0.01099	0.011634
2-benzthiazolyl	0.27	0.29	0.27	0.02	0.005398	0.006484	0.008937	0.009159
COPh	0.34	0.43	0.31	0.12	0.00328	0.013396	0.008828	0.012553
OCOPh	0.21	0.13	0.26	-0.13	0.00654	-0.001133	0.007252	0.003614
COOPh	0.37	0.44	0.34	0.1	0.005272	0.014667	0.012422	0.016013
CH=NPh	0.35	0.42	0.33	0.09	0.002693	0.007921	0.006161	0.008088
NHCOPh	0.02	-0.19	0.13	-0.32	0.003194	-0.008482	0.002541	-0.002457
CONHPh	0.23	0.41	0.17	0.24	0.005868	0.010171	0.013669	0.014829
C6H4-4-Me	0.06	-0.03	0.12	-0.15	-0.000101	-0.002569	-0.000878	-0.001881
CH2Ph	-0.08	-0.09	-0.04	-0.05	-0.000361	-0.003967	-0.001637	-0.00298
N=NPh-5-Me-2-OH	0.27	0.31	0.26	0.05	0.004436	0.008779	0.010595	0.011781
C6H4-4-OMe	0.05	-0.08	0.13	-0.21	-0.000554	-0.00375	-0.001968	-0.003232
CH(OH)Ph	0	-0.03	0.05	-0.08	0.001498	0.001471	0.005311	0.005083
CH2OPh	0.06	0.07	0.08	-0.01	0.002414	0.00367	0.004353	0.004761
CH2SO2Ph	0.15	0.16	0.17	-0.01	0.005697	0.007101	0.004883	0.005528
C(Et)3	-0.07	-0.2	0.02	-0.22	-0.002993	-0.006822	-0.005909	-0.007523
(CH2)6CH3	-0.07	-0.16	0	-0.16	-0.001785	-0.005867	-0.003991	-0.005613
SiMe(OSi(Me)3)2	-0.02	-0.01	0.01	-0.02	-0.001651	0.002138	-0.003238	-0.001292
CF2CF2C6H4-4-F	0.34	0.39	0.32	0.07	0.007718	0.011691	0.014124	0.015222
C≡CPh	0.14	0.16	0.15	0.01	0.003105	0.003814	0.005966	0.00614
CH=NCOPh	0.39	0.51	0.34	0.17	0.006577	0.016276	0.016415	0.019861
CH=CHPh	0.03	-0.07	0.1	-0.17	0.000794	-0.000462	0.001794	0.001048
CH2Fe(CO)2(pi-C5H5)	-0.26	-0.49	-0.11	-0.38	-0.004484	-0.012613	0.019114	0.016777
CH=NNHCOPh	0.39	0.51	0.34	0.17	0.003456	0.005691	0.006071	0.006861
NHCOC6H4-4-OMe	0.09	-0.06	0.17	-0.23	0.002357	-0.009896	-0.000268	-0.00537
SCH=NSO2C6H4-4-Me	0.65	0.7	0.61	0.09	0.010595	0.013065	0.023585	0.023684
C6H4-4-Et	0.07	-0.02	0.13	-0.15	-7.9e-05	-0.00249	-0.000823	-0.001803
CH2CH2Ph	-0.07	-0.12	-0.01	-0.11	-0.000838	-0.004483	-0.001279	-0.002865
SiPhMe2	0.04	0.07	0.06	0.01	-0.001145	0.002032	-0.002251	-0.000588
S(Me)=NSO2C6H4-4-Me	0.65	0.7	0.61	0.09	0.013482	0.013758	0.023252	0.022406
PO(t-Bu)2	0.31	0.41	0.28	0.13	0.003415	0.007057	0.007258	0.008841
PO(n-Bu)2	0.35	0.49	0.3	0.19	0.003899	0.007257	0.00839	0.009578
PO(On-Bu)2	0.41	0.57	0.35	0.22	0.004939	0.011374	0.008914	0.011656
P(t-Bu)2	0.01	0.15	-0.01	0.16	-3e-05	0.002677	0.000885	0.002303
C6H5Cr(CO)3	0.29	0.14	0.36	-0.22	0.006697	0.006733	0.013669	0.012967
2-benzo-4-thiopyronyl	0.34	0.35	0.34	0.01	0.007316	0.011909	0.017874	0.018994
2-benzothiopyronyl	0.48	0.45	0.48	-0.03	0.007199	0.009181	0.015664	0.015925
2-(benzo-1,4-pyronyl)	0.41	0.4	0.41	-0.01	0.006631	0.01073	0.016099	0.017097
C6H4-4-CHMe2	0.08	0.01	0.13	-0.12	-0.000101	-0.002517	-0.000876	-0.00186
Si(OSiMe3)3	-0.09	-0.01	-0.08	0.07	-0.0014	0.002423	-0.003459	-0.001454
ferrocenyl	-0.15	-0.18	-0.09	-0.09	-0.000847	-0.005187	-0.00144	-0.00321
C6H4-4-CMe3	0.07	0.01	0.12	-0.11	-0.000151	-0.002568	-0.001027	-0.002005
1-dibenzarsenyl	0.19	0.13	0.23	-0.1	0.001675	0.003507	0.0022	0.003088
1-dibenzoarsoxyl	0.17	0.09	0.22	-0.13	0.005785	0.009227	0.010543	0.011873
1-dibenzoarsazinyl	0.14	0.09	0.18	-0.09	0.002418	0.003797	0.001378	0.0021
AsPh2	0.03	0.09	0.04	0.05	0.001412	0.001536	0.001888	0.002264
AsOPh2	0.54	0.64	0.49	0.15	0.006441	0.009227	0.0112	0.012207
PPh2BCl3	0.67	0.72	0.62	0.1	0.010104	0.015504	0.019636	0.021668
NPh2	0	-0.22	0.12	-0.34	0.000486	-0.010055	0.000885	-0.003465
POPh2	0.38	0.53	0.32	0.21	0.00533	0.009377	0.009308	0.010995
PPh2	0.11	0.19	0.1	0.09	0.001489	0.002126	0.002256	0.002871
PSPh2	0.29	0.47	0.23	0.24	0.006071	0.009955	0.011283	0.012947
P(NPr2)-C6H4-3-F	0.2	0.24	0.2	0.04	0.000767	-0.00102	0.000302	-0.000435
pyron-comp1	0.37	0.38	0.37	0.01	0.006814	0.010315	0.016662	0.017368
pyron-comp2	0.38	0.38	0.38	0	0.006423	0.010014	0.015348	0.016153
imidazole-comp1	0.17	0.21	0.17	0.04	0.002207	0.003893	0.003506	0.004422
CHPh2	-0.03	-0.05	0.01	-0.06	9.2e-05	-0.003273	-0.001226	-0.002321
As-comp1	0.12	0.07	0.16	-0.09	-0.00041	-0.003456	-0.003533	-0.004353
POPh(Ph-4-Me)	0.13	0.3	0.09	0.21	0.004883	0.008788	0.007942	0.009644
CH2POPh2	0.14	0.01	0.21	-0.2	0.001036	-0.002015	-0.003483	-0.004117
PS(Ph)(Ph-4-Me)	0.09	0.3	0.03	0.27	0.005661	0.009413	0.009978	0.01165
Si(Me)Ph2	0.1	0.13	0.11	0.02	-0.000619	0.002734	-0.001625	0.000296
COOCHPh2	0.36	0.56	0.28	0.28	0.004592	0.013238	0.00993	0.013302
PO(Ph-4-Me)2	0.17	0.3	0.14	0.16	0.004466	0.008234	0.006654	0.008367
PS(Ph-4-Me)2	0.2	0.23	0.2	0.03	0.005257	0.008903	0.00871	0.0104
GePh3	0.05	0.08	0.07	0.01	0.000239	0.002068	-0.00089	0.000348
N=PPh3	-0.33	-0.77	-0.1	-0.67	-0.009792	-0.028939	-0.024014	-0.030897
SiPh3	-0.03	0.1	-0.04	0.14	-0.000186	0.003372	-0.001391	0.000631
CPh3	-0.01	0.02	0.01	0.01	-0.000414	-0.002746	-0.001963	-0.002398
1-(1,2(BH)10-C2H)	0.49	0.43	0.5	-0.07	0.009516	0.009642	0.02181	0.020882
1-(1,7(BH)10-C2H)	0.25	0.33	0.23	0.1	0.006177	0.005917	0.011683	0.011227
2-(1,7(BH)10-C2H)	0.14	0.15	0.16	-0.01	0.001749	0.005741	0.007563	0.009001
4-(1,7(BH)10-C2H)	-0.02	0.02	0	0.02	-0.000578	0.002329	-0.000444	0.001018
3-(1,2(BH)10-C2H)	0.2	0.19	0.22	-0.03	0.00228	0.005864	0.009471	0.010614
1-(1,2(BH)10-C2Me)	0.5	0.65	0.43	0.22	0.008317	0.011653	0.021154	0.021906
CH2-1-(1,2(BH)10-C2H)	0.12	0.12	0.14	-0.02	0.005489	0.005127	0.010802	0.010269
CH2-1-(1,7(BH)10-C2H)	0	0.01	0.03	-0.02	0.004213	0.00236	0.004888	0.004176
2-(methylcarbonyl)carboran-1-yl	0.4	0.63	0.31	0.32	0.008819	0.012846	0.015271	0.016451
2-((carbonyloxy)methyl)carboran-1-yl	0.7	0.74	0.66	0.08	0.007689	0.011395	0.021274	0.022364
CH2-1-(1,2(BH)10-C2Me)	0.1	0.11	0.12	-0.01	0.00575	0.004482	0.009819	0.009064
1-adamantyl	-0.12	-0.13	-0.07	-0.06	-0.002836	-0.006365	-0.006277	-0.007678

## Sheet: B3LYP_6-311++g(3df,2pd)_SMD
Functional Groups	σ_m	σ_p	F	R	ΔV_{m}	ΔV_{p}
Refernece Values for H	0	0	0	0	-14.7806	-14.7806
H	0	0	0	0	0	0
Me	-0.07	-0.17	0.01	-0.18	-0.004723	-0.00732
CH=CH2	0.06	-0.04	0.13	-0.17	0.002302	0.002035
Ph	0.06	-0.01	0.12	-0.13	0.001597	0.000737
OAc	0.39	0.31	0.42	-0.11	0.010417	0.00726
NHCOCH3	0.21	0	0.31	-0.31	0.004325	-0.000664
OMe	0.12	-0.27	0.29	-0.56	-0.001154	-0.009721
OH	0.12	-0.37	0.33	-0.7	0.002903	-0.006323
NH2	-0.16	-0.66	0.08	-0.74	-0.00981	-0.020986
F	0.34	0.06	0.45	-0.39	0.018241	0.011974
Cl	0.37	0.23	0.42	-0.19	0.020213	0.017357
Br	0.39	0.23	0.45	-0.22	0.020974	0.018446
CHO	0.35	0.42	0.33	0.09	0.027471	0.033648
COMe	0.38	0.5	0.33	0.17	0.019308	0.024448
COOMe	0.37	0.45	0.34	0.11	0.015477	0.020941
COOH	0.37	0.45	0.34	0.11	0.019552	0.025345
COCl	0.51	0.61	0.46	0.15	0.037312	0.044805
CF3	0.43	0.54	0.38	0.16	0.026804	0.028672
CN	0.56	0.66	0.51	0.15	0.038562	0.042168
NO2	0.71	0.78	0.65	0.13	0.045576	0.051378
NHMe	-0.21	-0.7	0.03	-0.73	-0.013741	-0.025625
NMe2	-0.16	-0.6	0	-0.6	-0.015929	-0.027227
CHF2	0.29	0.32	0.29	0.03	0.019395	0.020803
COF	0.55	0.7	0.48	0.22	0.035846	0.042836
SH	0.25	0.15	0.3	-0.15	0.009418	0.004564
NHNH2	-0.02	-0.55	0.22	-0.77	-0.003179	-0.014406
NO	0.62	0.91	0.49	0.42	0.040343	0.050369
CH2F	0.12	0.11	0.15	-0.04	0.010206	0.011457
CH2Cl	0.11	0.12	0.13	-0.01	0.011306	0.011522
CH2Br	0.12	0.14	0.14	0	0.012068	0.01224
CH2OH	0	0	0.03	-0.03	-0.005648	-0.007698
Et	-0.07	-0.15	0	-0.15	-0.00498	-0.007356
OEt	0.1	-0.24	0.26	-0.5	-0.002594	-0.011125
CCH	0.21	0.23	0.22	0.01	0.012522	0.014408
BF2	0.32	0.48	0.26	0.22	0.018103	0.024015
GeBr3	0.66	0.73	0.61	0.12	0.033755	0.036351
SiBr3	0.48	0.57	0.44	0.13	0.026872	0.030936
SO2Cl	1.2	1.11	1.16	-0.05	0.052117	0.057304
SCl	0.44	0.48	0.42	0.06	0.029999	0.035909
POCl2	0.78	0.9	0.7	0.2	0.0411465	0.046102
PCl2	0.54	0.61	0.5	0.11	0.029792	0.033723
PSCl2	0.7	0.8	0.63	0.17	0.037753	0.04084
GeCl3	0.71	0.79	0.65	0.14	0.035534	0.037755
SiCl3	0.48	0.56	0.44	0.12	0.026326	0.030272
SOF	0.74	0.83	0.67	0.16	0.040288	0.044321
SO2F	0.8	0.91	0.72	0.19	0.05144	0.056775
POF2	0.81	0.89	0.74	0.15	0.041159	0.044784
PF2	0.49	0.59	0.44	0.15	0.026425	0.030777
GeF3	0.85	0.97	0.76	0.21	0.042519	0.045157
SF3	0.7	0.8	0.63	0.17	0.040668	0.044612
SiF3	0.54	0.69	0.47	0.22	0.02786	0.032147
PF4	0.63	0.8	0.54	0.26	0.024155	0.026002
SF5	0.61	0.68	0.56	0.12	0.038494	0.039895
ONO2	0.55	0.7	0.48	0.22	0.029555	0.025032
N3	0.37	0.08	0.48	-0.4	0.020442	0.017758
B(OH)2	-0.01	0.12	-0.03	0.15	0.003404	0.006787
NHOH	-0.04	-0.34	0.11	-0.45	-0.002448	-0.010736
SO2NH2	0.53	0.6	0.49	0.11	0.030168	0.034015
PH2	0.06	0.05	0.09	-0.04	0.005875	0.003959
GeH3	0	0.01	0.03	-0.02	0.004332	0.004984
SiH3	0.05	0.1	0.06	0.04	0.007005	0.009049
CBr3	0.28	0.29	0.28	0.01	0.024944	0.027165
CClF2	0.42	0.46	0.4	0.06	0.027103	0.02886
5-chloro-1-tetrazolyl	0.6	0.61	0.58	0.03	0.042011	0.041558
N=CCl2	0.21	0.13	0.26	-0.13	0.014709	0.011464
CCl3	0.4	0.46	0.38	0.09	0.024816	0.026657
OCCl3	0.43	0.35	0.46	-0.11	0.025929	0.023894
N=NCF3	0.56	0.68	0.5	0.18	0.037316	0.044407
OCF3	0.38	0.35	0.39	-0.04	0.025864	0.02324
SOCF3	0.63	0.69	0.58	0.11	0.039033	0.041654
SeOCF3	0.81	0.83	0.76	0.07	0.035531	0.036287
SO2CF3	0.83	0.96	0.74	0.22	0.05172	0.057838
SeO2CF3	1.08	1.21	0.97	0.24	0.05744	0.059881
OSO2CF3	0.56	0.53	0.56	-0.03	0.033895	0.028411
SCF3	0.4	0.5	0.36	0.14	0.027132	0.030083
SeCF3	0.44	0.45	0.43	0.02	0.023658	0.025471
NC	0.48	0.49	0.47	0.02	0.034417	0.03428
NCO	0.27	0.19	0.31	-0.12	0.020134	0.01644
OCN	0.67	0.54	0.69	-0.15	0.040246	0.036054
SO2CN	1.1	1.26	0.97	0.29	0.059372	0.065281
NCS	0.48	0.38	0.51	-0.13	0.028338	0.02627
SCN	0.51	0.52	0.49	0.03	0.036697	0.0383
SeCN	0.61	0.66	0.57	0.09	0.027663	0.023295
N=NCN	0.71	1.03	0.56	0.47	0.051001	0.060806
N(O)=NCN	0.78	0.89	0.7	0.19	0.057798	0.063376
C(NO2)3	0.72	0.82	0.65	0.17	0.051392	0.054357
CHBr2	0.31	0.32	0.31	0.01	0.02075	0.021727
CHCl2	0.31	0.32	0.31	0.01	0.020188	0.020987
OCHCl2	0.38	0.26	0.43	-0.17	0.017609	0.015414
OCHF2	0.31	0.18	0.37	-0.19	0.014596	0.01216
SOCHF2	0.54	0.58	0.51	0.07	0.037004	0.037637
SO2CHF2	0.75	0.86	0.67	0.19	0.049219	0.054341
SCHF2	0.33	0.37	0.32	0.05	0.01701	0.019782
S(O)(=NH)CF3	0.72	0.84	0.64	0.2	0.041001	0.046739
NHSO2CF3	0.44	0.39	0.45	-0.06	0.028578	0.025965
NHCN	0.21	0.06	0.28	-0.22	0.021353	0.012793
1-(1H)-tetrazolyl	0.52	0.5	0.52	-0.02	0.039739	0.037257
5-(1H)-tetrazolyl	0.64	0.56	0.65	-0.09	0.03278	0.033724
5-hydroxy-1-tetrazolyl	0.39	0.33	0.41	-0.08	0.031467	0.030493
OCH2Cl	0.25	0.08	0.33	-0.25	0.011491	0.004448
OCH2F	0.2	0.02	0.29	-0.27	0.012086	0.007215
SCH2F	0.23	0.2	0.25	-0.05	0.021837	0.023258
NHCHO	0.19	0	0.28	-0.28	0.009302	0.004414
CONH2	0.28	0.36	0.26	0.1	0.016255	0.019108
CSNH2	0.25	0.3	0.24	0.06	0.019478	0.021723
CH=NOH	0.22	0.1	0.28	-0.18	0.010574	0.012128
N(O)=NCONH2	0.59	0.63	0.56	0.07	0.03527	0.038764
CH2SO2Me	0.15	0.17	0.16	0.01	0.003701	0.004117
SiMeCl2	0.31	0.39	0.29	0.1	0.016385	0.019453
SiMeF2	0.29	0.23	0.32	-0.09	0.014036	0.017332
NHCONH2	-0.03	-0.24	0.09	-0.33	-0.002468	-0.008866
N(Me)NO2	0.49	0.61	0.43	0.18	0.027573	0.027152
NHCSNH2	0.22	0.16	0.26	-0.1	0.004334	0.000834
SOMe	0.52	0.49	0.52	-0.03	0.023969	0.024074
S(OMe)	0.21	0.17	0.24	-0.07	0.009086	0.004603
OS(=O)Me	0.44	0.45	0.43	0.02	0.013908	0.01128
S(O)OMe	0.5	0.54	0.47	0.07	0.022578	0.025352
SO2Me	0.6	0.72	0.53	0.19	0.035028	0.038719
SSO2Me	0.43	0.54	0.38	0.16	0.031321	0.034537
OSO2Me	0.39	0.36	0.4	-0.04	0.027081	0.024217
SMe	0.15	0	0.23	-0.23	0.002785	-0.002449
SSMe	0.22	0.13	0.27	-0.14	0.014804	0.016383
SeMe	0.1	0	0.16	-0.16	0.003051	-0.001484
CH2NH2	-0.03	-0.11	0.04	-0.15	-0.004325	-0.00501
NHSO2Me	0.2	0.03	0.28	-0.25	0.021111	0.016846
N(COF)2	0.58	0.57	0.57	0	0.028774	0.027961
COCF3	0.63	0.8	0.54	0.26	0.037452	0.045201
SCOCF3	0.48	0.46	0.48	-0.02	0.028724	0.030523
OCOCF3	0.56	0.46	0.58	-0.12	0.028453	0.02464
N(CF3)C=O(F)	0.5	0.5	0.49	0.01	0.031248	0.031092
CF2CF3	0.47	0.52	0.44	0.08	0.02811	0.030102
OCF2CF3	0.48	0.28	0.55	-0.27	0.026466	0.023678
SO2CF2CF3	0.92	1.08	0.81	0.27	0.051856	0.058265
SCF2CF3	0.44	0.48	0.42	0.06	0.027967	0.030886
N(CF3)2	0.4	0.53	0.35	0.18	0.020107	0.015163
S(CF3)=NSO2CF3	1.18	1.28	1.07	0.21	0.064469	0.06749
SO(CF3)=NSO2CF3	1.23	1.4	1.09	0.31	0.069904	0.075419
N(SO2CF3)2	0.61	0.83	0.5	0.33	0.040744	0.042562
P(CF3)2	0.6	0.69	0.55	0.14	0.032786	0.036877
P(CN)2	0.82	0.9	0.75	0.15	0.044098	0.046767
OCF2CHFCl	0.35	0.28	0.38	-0.1	0.020239	0.017802
NHCOCF3	0.3	0.12	0.38	-0.26	0.022655	0.018349
CH=NSO2CF3	0.76	1	0.63	0.37	0.048061	0.055332
OCF2CHF2	0.34	0.25	0.38	-0.13	0.02035	0.017903
SCF2CHF2	0.38	0.47	0.35	0.12	0.022437	0.025453
C2N8S2H	0.63	0.64	0.6	0.04	0.052555	0.051258
SC≡CH	0.26	0.19	0.3	-0.11	0.020627	0.02277
SCH=CHCl	0.31	0.24	0.34	-0.1	0.022873	0.024331
SeCH=CHCl	0.28	0.26	0.3	-0.04	0.020598	0.021382
CH2CF3	0.12	0.09	0.15	-0.06	0.009765	0.008616
CH2SOCF3	0.25	0.24	0.27	-0.03	0.016708	0.016068
CH2SO2CF3	0.29	0.31	0.29	0.02	0.019553	0.01972
CH2SCF3	0.12	0.15	0.13	0.02	0.015314	0.014345
CH2CN	0.16	0.18	0.17	0.01	0.016408	0.01413
NHCOCH2Cl	0.17	-0.03	0.27	-0.3	0.012382	0.007648
N(Me)SO2CF3	0.46	0.44	0.46	-0.02	0.026398	0.025688
C(Me)(NO2)2	0.54	0.61	0.5	0.11	0.030741	0.032943
oxiranyl	0.05	0.03	0.09	-0.06	0.00524	0.004162
OCH=CH2	0.21	-0.09	0.34	-0.43	0.008675	0.000771
SCOMe	0.39	0.44	0.37	0.07	0.011579	0.013871
2-thiacylopropyl	0.04	0.01	0.08	-0.07	0.006583	0.005349
SCH=CH2	0.26	0.2	0.29	-0.09	0.017027	0.018779
SeCH=CH2	0.26	0.21	0.29	-0.08	0.014873	0.01605
1-aziridinyl	-0.07	-0.22	0.03	-0.25	-0.004647	-0.011529
2-aziridinyl	-0.06	-0.1	-0.01	-0.09	0.00588	0.002811
N-methyl-3-oxaziridinyl	0.09	0.12	0.1	0.02	0.007087	0.008519
NHCOOMe	-0.02	-0.17	0.07	-0.24	0.002489	-0.003555
CONHMe	0.35	0.36	0.35	0.01	0.011978	0.013871
CH=NOMe	0.37	0.3	0.4	-0.1	0.009413	0.01105
CH2CONH2	0.06	0.07	0.08	-0.01	0.018109	0.016048
NHCSMe	0.24	0.12	0.3	-0.18	0.012985	0.009199
CSNHMe	0.3	0.34	0.29	0.05	0.019476	0.021721
CH=NNHCONHNH2	0.22	0.16	0.26	-0.1	-0.003013	-0.001354
CH(OH)Me	0.08	-0.07	0.16	-0.23	-0.00442	-0.005119
CH2OMe	0.08	0.01	0.13	-0.12	-0.001836	-0.001151
SO2Et	0.66	0.77	0.59	0.18	0.033581	0.037385
SEt	0.18	0.03	0.26	-0.23	0.002711	-0.002045
P(Cl)NMe2	0.38	0.56	0.31	0.25	0.012361	0.013864
SiClMe2	0.16	0.21	0.16	0.05	0.00754	0.00987
SiFMe2	0.12	0.17	0.12	0.05	0.004829	0.007351
NHEt	-0.24	-0.61	-0.04	-0.57	-0.014233	-0.025961
N(Me)SO2Me	0.21	0.24	0.21	0.03	0.008955	0.006913
SO2NMe2	0.51	0.65	0.44	0.21	0.031981	0.035015
N(SO2Me)2	0.47	0.49	0.45	0.04	0.024945	0.026203
SN(Me)2	0.12	0.09	0.15	-0.06	-0.001641	-0.006542
N=NNMe2	-0.05	-0.03	-0.02	-0.01	-0.014139	-0.016321
P(O)Me2	0.43	0.5	0.4	0.1	0.015985	0.018142
PO(OMe)2	0.42	0.53	0.37	0.16	0.016623	0.021582
PMe2	0.03	0.06	0.05	0.01	0.000626	-0.000449
SiH(Me)2	0.01	0.04	0.03	0.01	-0.000776	0.00085
CCCF3	0.41	0.51	0.37	0.14	0.030639	0.033268
CF=CFCF3	0.39	0.46	0.36	0.1	0.028022	0.030365
N=C(CF3)2	0.29	0.23	0.32	-0.09	0.02402	0.02128
CF2CF2CF3	0.44	0.48	0.42	0.06	0.028017	0.030166
CF(CF3)2	0.37	0.53	0.31	0.22	0.027228	0.028044
SO2CF2CF2CF3	0.92	1.09	0.81	0.28	0.05183	0.058245
SO2CF(CF3)2	0.92	1.1	0.8	0.3	0.052968	0.059206
SCF2CF2CF3	0.45	0.48	0.43	0.05	0.028024	0.03098
SCF(CF3)2	0.48	0.51	0.46	0.03	0.029398	0.031984
C(OH)(CF3)2	0.29	0.3	0.29	0.01	0.02601	0.026155
CH(SCF3)2	0.44	0.44	0.43	0.01	0.028774	0.027583
CH(CN)2	0.53	0.52	0.52	0	0.034331	0.032551
CH=CHCF3-c	0.16	0.17	0.18	-0.01	0.015375	0.018201
CH=CHCF3-t	0.24	0.27	0.24	0.03	0.019965	0.020707
CCMe	0.21	0.03	0.29	-0.26	0.003724	0.004759
N(Me)COCF3	0.41	0.39	0.41	-0.02	0.019845	0.018386
cyclopropyl	-0.07	-0.21	0.02	-0.23	-0.005586	-0.009064
C(Me)=CH2	0.09	0.05	0.13	-0.08	-8.9e-05	-0.000685
CH=CHMe	0.02	-0.09	0.09	-0.18	-0.003318	-0.004725
CH2CH=CH2	-0.11	-0.14	-0.06	-0.08	-0.001031	-0.003164
C(Et)(NO2)2	0.56	0.64	0.51	0.13	0.029899	0.031608
OCH2CH=CH2	0.09	-0.25	0.25	-0.5	0.000723	-0.007836
COEt	0.38	0.48	0.34	0.14	0.018846	0.024178
COOEt	0.37	0.45	0.34	0.11	0.014131	0.019602
CH2OCOMe	0.04	0.05	0.07	-0.02	0.009434	0.009719
CH2CH2COOH	-0.03	-0.07	0.02	-0.09	0.00378	0.001348
SCH2CH=CH2	0.19	0.12	0.23	-0.11	0.004954	-0.000226
SeCH2CH=CH2	0.21	0.12	0.26	-0.14	0.006028	0.002306
CH2NHCOMe	0.05	-0.05	0.12	-0.17	0.015139	0.013799
NHCOOEt	0.11	-0.15	0.23	-0.38	0.00147	-0.004528
C(NO2)Me2	0.18	0.2	0.19	0.01	0.01331	0.012172
isopropyl	-0.04	-0.15	0.04	-0.19	-0.005332	-0.007807
Pr	-0.06	-0.13	0.01	-0.14	-0.005332	-0.007681
NHCONHEt	0.04	-0.26	0.19	-0.45	-0.006059	-0.012709
NHCSNHEt	0.3	0.07	0.4	-0.33	-0.00058	-0.004543
OCHMe2	0.1	-0.45	0.34	-0.79	-0.003953	-0.01275
OPr	0.1	-0.25	0.26	-0.51	-0.002904	-0.011422
CH2CH(OH)Me	-0.12	-0.17	-0.06	-0.11	-0.009953	-0.011173
C(OOH)Me2	0.06	-0.14	0.17	-0.31	0.001243	0.001407
SCHMe2	0.23	0.07	0.3	-0.23	0.002491	-0.001728
CH2NMe2	0	0.01	0.03	-0.02	-0.003791	-0.004469
GeMe3	0	0	0.03	-0.03	-0.004208	-0.003875
Si(Me)2OMe	0.04	-0.02	0.09	-0.11	-0.004605	-0.001808
OSiMe3	0.13	-0.27	0.31	-0.58	-0.000885	-0.006697
SiMe(OMe)2	0.04	0.1	0.05	0.05	-0.007949	-0.003958
Si(OMe)3	0.09	0.13	0.1	0.03	0.002702	0.006628
SiMe3	-0.04	-0.07	0.01	-0.08	-0.003692	-0.002432
cyclo-C4F7	0.48	0.53	0.45	0.08	0.024622	0.024757
COCF2CF2CF3	0.63	0.79	0.55	0.24	0.037816	0.045786
C(CF3)3	0.55	0.55	0.53	0.02	0.027065	0.028573
(CF2)3CF3	0.47	0.52	0.44	0.08	0.02821	0.030406
SO2C(CF3)3	0.96	1.13	0.84	0.29	0.053758	0.060531
SC(CF3)3	0.51	0.58	0.47	0.11	0.030188	0.033942
C(SCF3)3	0.51	0.53	0.49	0.04	0.034456	0.035575
SeC(CF3)3	0.49	0.54	0.46	0.08	0.028847	0.031442
C(CN)3	0.97	0.96	0.92	0.04	0.059429	0.060388
cyclo-1-(OH)C4F6	0.36	0.37	0.36	0.01	0.013318	0.013953
CH=C(CN)2	0.66	0.84	0.57	0.27	0.04593	0.051757
2-(5-bromofuryl)	0.15	0	0.23	-0.23	0.007528	0.006227
1-pyrroline-2,5-dione	0.305	0.244	0.317	-0.073	0.010875	0.010685
3-chloro-1-pyrrolidine-2,5-dione	0.387	0.359	0.387	-0.028	0.017989	0.017732
3-pyridazinyl	0.28	0.48	0.21	0.27	0.00831	0.009622
C(Me)(CN)2	0.6	0.57	0.59	-0.02	0.044325	0.048327
2-furyl	0.06	0.02	0.1	-0.08	0.001988	0.000822
2-thienyl	0.09	0.05	0.13	-0.08	0.004393	0.00323
3-thienyl	0.03	-0.02	0.08	-0.1	0.002545	0.001102
2-selenienyl	0.06	0.04	0.1	-0.06	0.003806	0.002364
1-pyrryl	0.47	0.37	0.5	-0.13	0.011406	0.005256
1-pyrrolidine-2,5-dione	0.298	0.257	0.303	-0.046	0.010207	0.010326
cyclobutyl	-0.05	-0.14	0.02	-0.16	-0.004916	-0.006972
COCHMe2	0.38	0.47	0.35	0.12	0.016375	0.020966
NHCOCH(Me)2	0.11	-0.1	0.21	-0.31	0.003639	-0.001363
CMe3	-0.1	-0.2	-0.02	-0.18	-0.006436	-0.008823
CH(Me)Et	-0.08	-0.12	-0.02	-0.1	-0.005803	-0.008299
CH2CH(Me)2	-0.07	-0.12	-0.01	-0.11	-0.005008	-0.007349
n-Bu	-0.08	-0.16	-0.01	-0.15	-0.005589	-0.007985
On-Bu	0.1	-0.32	0.29	-0.61	-0.003051	-0.011567
CH2C(OH)Me2	-0.16	-0.17	-0.11	-0.06	-0.007238	-0.008916
C(OMe)3	-0.03	-0.04	0.01	-0.05	0.0038	0.005292
AsEt2	0.22	0	0.32	-0.32	0.000252	0.00041
As(O)Et2	0.57	0.44	0.6	-0.16	0.016153	0.017107
As(S)Et2	0.52	0.44	0.54	-0.1	0.018819	0.019323
NH(CH2)3CH3	-0.34	-0.51	-0.21	-0.3	-0.014719	-0.026465
NEt2	-0.23	-0.6	-0.1	-0.5	-0.019656	-0.032683
PO(Et)2	0.37	0.47	0.33	0.14	0.014272	0.016269
N=NPO(OEt)2	0.16	0.74	-0.05	0.79	0.025885	0.032766
P(Et)2	0.1	0.13	0.11	0.02	0.002308	0.003201
P(S)Et2	0.39	0.46	0.36	0.1	0.017675	0.01931
CH2OSi(Me)3	-0.04	-0.05	0	-0.05	-0.003065	-0.002686
CH2Si(Me)3	-0.16	-0.21	-0.09	-0.12	-0.00776	-0.011773
PO(NMe2)2	0.3	0.4	0.27	0.13	0.009327	0.01302
P(NMe2)2	0.18	0.25	0.17	0.08	-0.000798	0.001196
C(CN)=C(CN)2	0.77	0.98	0.65	0.33	0.055026	0.059547
2-(5-cyanofuryl)	0.25	0.1	0.32	-0.22	0.021591	0.021369
3-pyridyl	0.23	0.25	0.24	0.01	0.009744	0.008649
4-pyridyl	0.27	0.44	0.21	0.23	0.014658	0.014195
2-(4,6-dimethyl-s-triazinyl)	0.25	0.39	0.21	0.18	0.008065	0.013253
1-cyclopentenyl	-0.06	-0.05	-0.03	-0.02	-0.003836	-0.00491
cyclopentyl	-0.05	-0.14	0.02	-0.16	-0.006115	-0.008495
COCMe3	0.27	0.32	0.26	0.06	0.014307	0.017819
NHCO2n-Bu	0.06	-0.05	0.13	-0.18	0.003472	-0.001521
CEt(Me)2	-0.06	-0.18	0.03	-0.21	-0.007227	-0.009577
CH2C(Me)3	-0.05	-0.17	0.03	-0.14	-0.005325	-0.00735
(CH2)4CH3	-0.08	-0.15	-0.01	-0.14	-0.005666	-0.008056
O(CH2)4CH3	0.1	-0.34	0.29	-0.63	0.002411	-0.001384
CH2PO(OEt)2	0.12	0.06	0.17	-0.11	0.000544	-0.000298
CH2CH2SiMe3	-0.16	-0.17	-0.11	-0.06	-0.006181	-0.008757
Si(Me)2OSiMe3	0	-0.01	0.04	-0.05	-0.005647	-0.00371
C6Cl5	0.25	0.24	0.27	-0.03	0.01574	0.015053
C6F5	0.26	0.27	0.27	0	0.017627	0.017573
P(O)(C3F7)2	0.95	1.1	0.84	0.26	0.044983	0.049485
OP(O)(C3F7)2	0.66	0.56	0.67	-0.11	0.031749	0.026892
NHP(O)(C3F7)2	0.28	0.18	0.33	-0.15	0.021693	0.014581
CH2Mn(CO)5	-0.14	-0.44	0.02	-0.46	-0.006466	-0.01201
C6H2-2,4,6-(NO2)3	0.26	0.3	0.26	0.04	0.026087	0.025049
C6H4-3-Br	0.09	0.08	0.12	-0.04	0.008602	0.007611
C6H4-4-Br	0.15	0.12	0.18	-0.06	0.008716	0.00744
C6H4-3-Cl	0.15	0.1	0.19	-0.09	0.008297	0.007304
C6H4-4-Cl	0.15	0.12	0.18	-0.06	0.00827	0.006979
C6H4-3-F	0.15	0.1	0.19	-0.09	0.007311	0.00639
C6H4-4-F	0.12	0.06	0.17	-0.11	0.006061	0.004602
OC6H4-4-F	-0.08	-0.1	-0.03	-0.07	0.01187	0.007884
C6H4-3-NO2	0.21	0.2	0.23	-0.03	0.016836	0.015361
C6H4-4-NO2	0.25	0.26	0.26	0	0.023448	0.022716
SC6H4-4-NO2	0.32	0.24	0.36	-0.12	0.023746	0.024381
SOC6H4-4-NO2	0.58	0.6	0.55	0.05	0.038543	0.039364
2-benzotriazolyl	0.49	0.51	0.47	0.04	0.020759	0.021688
N(O)=NSO2Ph	0.69	0.79	0.62	0.17	0.045541	0.050653
N=NPh	0.32	0.39	0.3	0.09	0.011113	0.014955
OPh	0.25	-0.03	0.37	-0.4	0.00771	0.00416
SOPh	0.5	0.44	0.51	-0.07	0.020002	0.020377
2-(5-acetylfuryl)	0.24	0.08	0.31	-0.23	0.020278	0.020014
2-(6-methylpyronyl)	0.38	0.43	0.36	0.07	0.024844	0.026018
SO2Ph	0.62	0.68	0.5	0.1	0.03018	0.0342
OSO2Ph	0.36	0.33	0.37	-0.04	0.013204	0.011898
SPh	0.23	0.07	0.3	-0.23	0.009604	0.011291
NHPh	-0.02	-0.56	0.22	-0.78	-0.001046	-0.010501
NHSO2Ph	0.33	0.03	0.43	-0.4	0.016608	0.013711
SO2NHPh	0.56	0.65	0.51	0.14	0.033046	0.036549
2-(5-ethylfuryl)	0.09	-0.13	0.2	-0.33	-0.001723	-0.003257
1-(2,5-dimethylpyrryl)	0.49	0.38	0.52	-0.14	0.017323	0.016422
1-cyclohexenyl	-0.1	-0.08	-0.07	-0.01	-0.006073	-0.007599
cyclohexyl	-0.05	-0.15	0.03	-0.18	-0.006521	-0.008885
N(n-Pr)2	-0.26	-0.6	-0.14	-0.46	-0.019997	-0.033093
(CH2)4NMe2	-0.08	-0.16	-0.01	-0.15	-0.004779	-0.007164
PO(i-Pr)2	0.37	0.41	0.36	0.05	0.013812	0.015829
P(i-Pr)2	0.02	0.06	0.04	0.02	-0.001071	-0.002688
P(O)(OPr)2	0.38	0.5	0.33	0.17	0.014342	0.019356
Ge(Et)3	0	0	0.03	-0.03	-0.006144	-0.005989
Si(OEt)3	0.02	0.08	0.03	0.05	-0.01084	-0.006363
P(=NSO2CF3)(C3F7)2	1.24	1.37	1.11	0.26	0.062854	0.067716
Si(NMe2)3	-0.04	-0.04	0	-0.04	-0.006918	-0.004687
2-benzoxazolyl	0.3	0.33	0.3	0.04	0.01424	0.015882
2-benzthiazolyl	0.27	0.29	0.27	0.02	0.011029	0.012134
COPh	0.34	0.43	0.31	0.12	0.014406	0.020235
OCOPh	0.21	0.13	0.26	-0.13	0.009163	0.006193
COOPh	0.37	0.44	0.34	0.1	0.019431	0.025326
CH=NPh	0.35	0.42	0.33	0.09	0.010219	0.013371
NHCOPh	0.02	-0.19	0.13	-0.32	0.004473	-0.00029
CONHPh	0.23	0.41	0.17	0.24	0.019051	0.021259
C6H4-4-Me	0.06	-0.03	0.12	-0.15	-0.001292	-0.002288
CH2Ph	-0.08	-0.09	-0.04	-0.05	-0.002644	-0.004763
N=NPh-5-Me-2-OH	0.27	0.31	0.26	0.05	0.014249	0.016909
C6H4-4-OMe	0.05	-0.08	0.13	-0.21	-0.002502	-0.003881
CH(OH)Ph	0	-0.03	0.05	-0.08	0.005202	0.004225
CH2OPh	0.06	0.07	0.08	-0.01	0.00467	0.005114
CH2SO2Ph	0.15	0.16	0.17	-0.01	0.003014	0.003827
C(Et)3	-0.07	-0.2	0.02	-0.22	-0.008071	-0.010616
(CH2)6CH3	-0.07	-0.16	0	-0.16	-0.005776	-0.008132
SiMe(OSi(Me)3)2	-0.02	-0.01	0.01	-0.02	-0.003341	-0.000733
CF2CF2C6H4-4-F	0.34	0.39	0.32	0.07	0.017512	0.01961
C≡CPh	0.14	0.16	0.15	0.01	0.0088	0.010274
CH=NCOPh	0.39	0.51	0.34	0.17	0.023915	0.028613
CH=CHPh	0.03	-0.07	0.1	-0.17	0.001959	0.001179
CH2Fe(CO)2(pi-C5H5)	-0.26	-0.49	-0.11	-0.38	-0.012133	-0.016284
CH=NNHCOPh	0.39	0.51	0.34	0.17	0.011383	0.013349
NHCOC6H4-4-OMe	0.09	-0.06	0.17	-0.23	0.000827	-0.003883
SCH=NSO2C6H4-4-Me	0.65	0.7	0.61	0.09	0.034807	0.03472
C6H4-4-Et	0.07	-0.02	0.13	-0.15	-0.001312	-0.002279
CH2CH2Ph	-0.07	-0.12	-0.01	-0.11	-0.001892	-0.004345
SiPhMe2	0.04	0.07	0.06	0.01	-0.003062	-0.001315
S(Me)=NSO2C6H4-4-Me	0.65	0.7	0.61	0.09	0.032675	0.033822
PO(t-Bu)2	0.31	0.41	0.28	0.13	0.011143	0.013665
PO(n-Bu)2	0.35	0.49	0.3	0.19	0.013187	0.015178
PO(On-Bu)2	0.41	0.57	0.35	0.22	0.014041	0.019057
P(t-Bu)2	0.01	0.15	-0.01	0.16	0.001724	0.003434
C6H5Cr(CO)3	0.29	0.14	0.36	-0.22	0.018581	0.017325
2-benzo-4-thiopyronyl	0.34	0.35	0.34	0.01	0.028301	0.030305
2-benzothiopyronyl	0.48	0.45	0.48	-0.03	0.023228	0.02416
2-(benzo-1,4-pyronyl)	0.41	0.4	0.41	-0.01	0.025238	0.027106
C6H4-4-CHMe2	0.08	0.01	0.13	-0.12	-0.00145	-0.002448
Si(OSiMe3)3	-0.09	-0.01	-0.08	0.07	-0.004359	-0.001345
ferrocenyl	-0.15	-0.18	-0.09	-0.09	-0.002055	-0.004145
C6H4-4-CMe3	0.07	0.01	0.12	-0.11	-0.001627	-0.002585
1-dibenzarsenyl	0.19	0.13	0.23	-0.1	0.003593	0.004715
1-dibenzoarsoxyl	0.17	0.09	0.22	-0.13	0.018517	0.02079
1-dibenzoarsazinyl	0.14	0.09	0.18	-0.09	0.000894	0.002216
AsPh2	0.03	0.09	0.04	0.05	0.003101	0.003556
AsOPh2	0.54	0.64	0.49	0.15	0.018213	0.020242
PPh2BCl3	0.67	0.72	0.62	0.1	0.028044	0.031215
NPh2	0	-0.22	0.12	-0.34	0.00175	-0.003096
POPh2	0.38	0.53	0.32	0.21	0.015019	0.018792
PPh2	0.11	0.19	0.1	0.09	0.004456	0.005969
PSPh2	0.29	0.47	0.23	0.24	0.017379	0.020525
P(NPr2)-C6H4-3-F	0.2	0.24	0.2	0.04	-0.000252	-0.00104
pyron-comp1	0.37	0.38	0.37	0.01	0.02564	0.027047
pyron-comp2	0.38	0.38	0.38	0	0.023781	0.025318
imidazole-comp1	0.17	0.21	0.17	0.04	0.007027	0.009234
CHPh2	-0.03	-0.05	0.01	-0.06	-0.00114	-0.002667
As-comp1	0.12	0.07	0.16	-0.09	-0.004258	-0.00461
POPh(Ph-4-Me)	0.13	0.3	0.09	0.21	0.013191	0.017095
CH2POPh2	0.14	0.01	0.21	-0.2	-0.006598	-0.007279
PS(Ph)(Ph-4-Me)	0.09	0.3	0.03	0.27	0.016114	0.019515
Si(Me)Ph2	0.1	0.13	0.11	0.02	-0.001324	0.001019
COOCHPh2	0.36	0.56	0.28	0.28	0.015014	0.0207
PO(Ph-4-Me)2	0.17	0.3	0.14	0.16	0.011406	0.015443
PS(Ph-4-Me)2	0.2	0.23	0.2	0.03	0.014391	0.017918
GePh3	0.05	0.08	0.07	0.01	-0.000227	0.001175
N=PPh3	-0.33	-0.77	-0.1	-0.67	-0.034899	-0.042502
SiPh3	-0.03	0.1	-0.04	0.14	-0.000741	0.001971
CPh3	-0.01	0.02	0.01	0.01	-0.001713	-0.002695
1-(1,2(BH)10-C2H)	0.49	0.43	0.5	-0.07	0.029708	0.027539
1-(1,7(BH)10-C2H)	0.25	0.33	0.23	0.1	0.015118	0.014341
2-(1,7(BH)10-C2H)	0.14	0.15	0.16	-0.01	0.011817	0.010579
4-(1,7(BH)10-C2H)	-0.02	0.02	0	0.02	-0.000781	-0.00093
3-(1,2(BH)10-C2H)	0.2	0.19	0.22	-0.03	0.013572	0.013296
1-(1,2(BH)10-C2Me)	0.5	0.65	0.43	0.22	0.02964	0.0298
CH2-1-(1,2(BH)10-C2H)	0.12	0.12	0.14	-0.02	0.012251	0.009837
CH2-1-(1,7(BH)10-C2H)	0	0.01	0.03	-0.02	0.003149	0.00135
2-(methylcarbonyl)carboran-1-yl	0.4	0.63	0.31	0.32	0.019083	0.019948
2-((carbonyloxy)methyl)carboran-1-yl	0.7	0.74	0.66	0.08	0.031919	0.033232
CH2-1-(1,2(BH)10-C2Me)	0.1	0.11	0.12	-0.01	0.010726	0.008364
1-adamantyl	-0.12	-0.13	-0.07	-0.06	-0.008457	-0.010615

## Sheet: B3LYP_LanL2DZ_SMD
Functional Groups	σ_m	σ_p	F	R	ΔV_{m}	ΔV_{p}
Refernece Values for H	0	0	0	0	-14.7599	-14.7599
H	0	0	0	0	0	0
Me	-0.07	-0.17	0.01	-0.18	-0.005249	-0.007509
CH=CH2	0.06	-0.04	0.13	-0.17	0.001843	0.002024
Ph	0.06	-0.01	0.12	-0.13	0.001423	0.001169
OAc	0.39	0.31	0.42	-0.11	0.014497	0.012339
NHCOCH3	0.21	0	0.31	-0.31	0.004941	0.000738
OMe	0.12	-0.27	0.29	-0.56	0.00149	-0.005972
OH	0.12	-0.37	0.33	-0.7	0.006088	-0.002107
NH2	-0.16	-0.66	0.08	-0.74	-0.014745	-0.027836
F	0.34	0.06	0.45	-0.39	0.024983	0.019923
Cl	0.37	0.23	0.42	-0.19	0.025181	0.022482
Br	0.39	0.23	0.45	-0.22	0.023019	0.020697
CHO	0.35	0.42	0.33	0.09	0.029545	0.036172
COMe	0.38	0.5	0.33	0.17	0.021419	0.027299
COOMe	0.37	0.45	0.34	0.11	0.017734	0.024301
COOH	0.37	0.45	0.34	0.11	0.021918	0.028697
COCl	0.51	0.61	0.46	0.15	0.044854	0.053604
CF3	0.43	0.54	0.38	0.16	0.036711	0.040225
CN	0.56	0.66	0.51	0.15	0.037873	0.041509
NO2	0.71	0.78	0.65	0.13	0.052561	0.059676
NHMe	-0.21	-0.7	0.03	-0.73	-0.017469	-0.030539
NMe2	-0.16	-0.6	0	-0.6	-0.020323	-0.032618
CHF2	0.29	0.32	0.29	0.03	0.025133	0.027823
COF	0.55	0.7	0.48	0.22	0.042771	0.051
SH	0.25	0.15	0.3	-0.15	0.012037	0.007652
NHNH2	-0.02	-0.55	0.22	-0.77	-0.007521	-0.020242
NO	0.62	0.91	0.49	0.42	0.04665	0.057716
CH2F	0.12	0.11	0.15	-0.04	0.012601	0.014594
CH2Cl	0.11	0.12	0.13	-0.01	0.014485	0.015917
CH2Br	0.12	0.14	0.14	0	0.013801	0.014805
CH2OH	0	0	0.03	-0.03	-0.00709	-0.008388
Et	-0.07	-0.15	0	-0.15	-0.005674	-0.007638
OEt	0.1	-0.24	0.26	-0.5	0.000244	-0.00717
CCH	0.21	0.23	0.22	0.01	0.012823	0.014961
BF2	0.32	0.48	0.26	0.22	0.026384	0.033537
GeBr3	0.66	0.73	0.61	0.12	0.043435	0.046375
SiBr3	0.48	0.57	0.44	0.13	0.038817	0.042702
SO2Cl	1.2	1.11	1.16	-0.05	0.078381	0.082031
SCl	0.44	0.48	0.42	0.06	0.042248	0.050599
POCl2	0.78	0.9	0.7	0.2	0.062289	0.066522
PCl2	0.54	0.61	0.5	0.11	0.042018	0.046387
PSCl2	0.7	0.8	0.63	0.17	0.055175	0.05793
GeCl3	0.71	0.79	0.65	0.14	0.047031	0.049614
SiCl3	0.48	0.56	0.44	0.12	0.042072	0.046052
SOF	0.74	0.83	0.67	0.16	0.052684	0.057263
SO2F	0.8	0.91	0.72	0.19	0.076852	0.080625
POF2	0.81	0.89	0.74	0.15	0.061508	0.064671
PF2	0.49	0.59	0.44	0.15	0.034304	0.03889
GeF3	0.85	0.97	0.76	0.21	0.049341	0.052254
SF3	0.7	0.8	0.63	0.17	0.060122	0.068227
SiF3	0.54	0.69	0.47	0.22	0.044806	0.049379
PF4	0.63	0.8	0.54	0.26	0.052246	0.055443
SF5	0.61	0.68	0.56	0.12	Excluded	Excluded
ONO2	0.55	0.7	0.48	0.22	0.037348	0.034123
N3	0.37	0.08	0.48	-0.4	0.024511	0.022678
B(OH)2	-0.01	0.12	-0.03	0.15	0.003898	0.007994
NHOH	-0.04	-0.34	0.11	-0.45	-0.001966	-0.010218
SO2NH2	0.53	0.6	0.49	0.11	0.05105	0.053733
PH2	0.06	0.05	0.09	-0.04	0.005454	0.00341
GeH3	0	0.01	0.03	-0.02	0.003987	0.005015
SiH3	0.05	0.1	0.06	0.04	0.004821	0.00628
CBr3	0.28	0.29	0.28	0.01	0.028929	0.032216
CClF2	0.42	0.46	0.4	0.06	0.035927	0.039412
5-chloro-1-tetrazolyl	0.6	0.61	0.58	0.03	0.045744	0.045711
N=CCl2	0.21	0.13	0.26	-0.13	0.029377	0.031206
CCl3	0.4	0.46	0.38	0.09	0.031966	0.03547
OCCl3	0.43	0.35	0.46	-0.11	0.034493	0.033185
N=NCF3	0.56	0.68	0.5	0.18	0.050673	0.060656
OCF3	0.38	0.35	0.39	-0.04	0.037224	0.035278
SOCF3	0.63	0.69	0.58	0.11	0.0476	0.049244
SeOCF3	0.81	0.83	0.76	0.07	0.040915	0.041555
SO2CF3	0.83	0.96	0.74	0.22	0.068493	0.071119
SeO2CF3	1.08	1.21	0.97	0.24	0.068155	0.069048
OSO2CF3	0.56	0.53	0.56	-0.03	Excluded	Excluded
SCF3	0.4	0.5	0.36	0.14	0.033775	0.035917
SeCF3	0.44	0.45	0.43	0.02	0.02887	0.030698
NC	0.48	0.49	0.47	0.02	0.034986	0.034951
NCO	0.27	0.19	0.31	-0.12	0.028152	0.025511
OCN	0.67	0.54	0.69	-0.15	0.042895	0.039503
SO2CN	1.1	1.26	0.97	0.29	0.073191	0.074791
NCS	0.48	0.38	0.51	-0.13	0.034375	0.03281
SCN	0.51	0.52	0.49	0.03	0.038087	0.038717
SeCN	0.61	0.66	0.57	0.09	0.03226	0.032702
N=NCN	0.71	1.03	0.56	0.47	0.053299	0.063616
N(O)=NCN	0.78	0.89	0.7	0.19	0.059956	0.066587
C(NO2)3	0.72	0.82	0.65	0.17	0.058312	0.062156
CHBr2	0.31	0.32	0.31	0.01	0.023141	0.024962
CHCl2	0.31	0.32	0.31	0.01	0.025068	0.027178
OCHCl2	0.38	0.26	0.43	-0.17	0.024296	0.022947
OCHF2	0.31	0.18	0.37	-0.19	0.021545	0.020044
SOCHF2	0.54	0.58	0.51	0.07	0.044248	0.044243
SO2CHF2	0.75	0.86	0.67	0.19	0.062794	0.06481
SCHF2	0.33	0.37	0.32	0.05	0.019705	0.02187
S(O)(=NH)CF3	0.72	0.84	0.64	0.2	0.053867	0.056771
NHSO2CF3	0.44	0.39	0.45	-0.06	Excluded	Excluded
NHCN	0.21	0.06	0.28	-0.22	0.020849	0.012603
1-(1H)-tetrazolyl	0.52	0.5	0.52	-0.02	0.042085	0.039813
5-(1H)-tetrazolyl	0.64	0.56	0.65	-0.09	0.035834	0.037682
5-hydroxy-1-tetrazolyl	0.39	0.33	0.41	-0.08	0.031308	0.030701
OCH2Cl	0.25	0.08	0.33	-0.25	0.020209	0.016184
OCH2F	0.2	0.02	0.29	-0.27	0.017248	0.013348
SCH2F	0.23	0.2	0.25	-0.05	0.025075	0.025769
NHCHO	0.19	0	0.28	-0.28	0.009908	0.005661
CONH2	0.28	0.36	0.26	0.1	0.018076	0.021575
CSNH2	0.25	0.3	0.24	0.06	0.020435	0.023553
CH=NOH	0.22	0.1	0.28	-0.18	0.012479	0.014839
N(O)=NCONH2	0.59	0.63	0.56	0.07	0.039825	0.044987
CH2SO2Me	0.15	0.17	0.16	0.01	0.011262	0.014545
SiMeCl2	0.31	0.39	0.29	0.1	0.025506	0.028536
SiMeF2	0.29	0.23	0.32	-0.09	0.022212	0.02552
NHCONH2	-0.03	-0.24	0.09	-0.33	-0.002729	-0.008371
N(Me)NO2	0.49	0.61	0.43	0.18	0.03126	0.031273
NHCSNH2	0.22	0.16	0.26	-0.1	0.00438	-2.2e-05
SOMe	0.52	0.49	0.52	-0.03	0.028698	0.028511
S(OMe)	0.21	0.17	0.24	-0.07	0.022644	0.026437
OS(=O)Me	0.44	0.45	0.43	0.02	0.009245	0.011098
S(O)OMe	0.5	0.54	0.47	0.07	0.031032	0.033982
SO2Me	0.6	0.72	0.53	0.19	0.048669	0.050415
SSO2Me	0.43	0.54	0.38	0.16	0.035572	0.045679
OSO2Me	0.39	0.36	0.4	-0.04	0.031372	0.033719
SMe	0.15	0	0.23	-0.23	0.010793	0.011695
SSMe	0.22	0.13	0.27	-0.14	0.020275	0.023056
SeMe	0.1	0	0.16	-0.16	0.003691	-0.000304
CH2NH2	-0.03	-0.11	0.04	-0.15	-0.007594	-0.008063
NHSO2Me	0.2	0.03	0.28	-0.25	0.01579	0.017473
N(COF)2	0.58	0.57	0.57	0	0.038339	0.03795
COCF3	0.63	0.8	0.54	0.26	0.046024	0.055412
SCOCF3	0.48	0.46	0.48	-0.02	0.034249	0.035239
OCOCF3	0.56	0.46	0.58	-0.12	0.03711	0.034039
N(CF3)C=O(F)	0.5	0.5	0.49	0.01	0.041324	0.041651
CF2CF3	0.47	0.52	0.44	0.08	0.037839	0.041082
OCF2CF3	0.48	0.28	0.55	-0.27	0.037603	0.035564
SO2CF2CF3	0.92	1.08	0.81	0.27	0.070156	0.073238
SCF2CF3	0.44	0.48	0.42	0.06	0.03526	0.037486
N(CF3)2	0.4	0.53	0.35	0.18	0.032882	0.029493
S(CF3)=NSO2CF3	1.18	1.28	1.07	0.21	0.07571	0.076787
SO(CF3)=NSO2CF3	1.23	1.4	1.09	0.31	0.084814	0.086471
N(SO2CF3)2	0.61	0.83	0.5	0.33	Excluded	Excluded
P(CF3)2	0.6	0.69	0.55	0.14	0.040356	0.043684
P(CN)2	0.82	0.9	0.75	0.15	0.042279	0.04357
OCF2CHFCl	0.35	0.28	0.38	-0.1	0.028711	0.027237
NHCOCF3	0.3	0.12	0.38	-0.26	0.027493	0.023887
CH=NSO2CF3	0.76	1	0.63	0.37	0.055648	0.062619
OCF2CHF2	0.34	0.25	0.38	-0.13	0.029263	0.027755
SCF2CHF2	0.38	0.47	0.35	0.12	0.027565	0.030042
C2N8S2H	0.63	0.64	0.6	0.04	0.051995	0.04953
SC≡CH	0.26	0.19	0.3	-0.11	0.022987	0.024442
SCH=CHCl	0.31	0.24	0.34	-0.1	0.025533	0.026386
SeCH=CHCl	0.28	0.26	0.3	-0.04	0.022669	0.023545
CH2CF3	0.12	0.09	0.15	-0.06	0.013443	0.012841
CH2SOCF3	0.25	0.24	0.27	-0.03	0.022574	0.024426
CH2SO2CF3	0.29	0.31	0.29	0.02	Excluded	Excluded
CH2SCF3	0.12	0.15	0.13	0.02	0.021577	0.021668
CH2CN	0.16	0.18	0.17	0.01	0.015453	0.013605
NHCOCH2Cl	0.17	-0.03	0.27	-0.3	0.013924	0.010035
N(Me)SO2CF3	0.46	0.44	0.46	-0.02	Excluded	Excluded
C(Me)(NO2)2	0.54	0.61	0.5	0.11	0.034403	0.037996
oxiranyl	0.05	0.03	0.09	-0.06	0.007829	0.008019
OCH=CH2	0.21	-0.09	0.34	-0.43	0.011154	0.004326
SCOMe	0.39	0.44	0.37	0.07	0.011846	0.013664
2-thiacylopropyl	0.04	0.01	0.08	-0.07	0.010474	0.01073
SCH=CH2	0.26	0.2	0.29	-0.09	0.017726	0.019004
SeCH=CH2	0.26	0.21	0.29	-0.08	0.01526	0.016658
1-aziridinyl	-0.07	-0.22	0.03	-0.25	-0.00478	-0.011553
2-aziridinyl	-0.06	-0.1	-0.01	-0.09	0.007229	0.00489
N-methyl-3-oxaziridinyl	0.09	0.12	0.1	0.02	0.006024	0.010288
NHCOOMe	-0.02	-0.17	0.07	-0.24	0.00523	0.000207
CONHMe	0.35	0.36	0.35	0.01	0.013489	0.016643
CH=NOMe	0.37	0.3	0.4	-0.1	0.010976	0.013423
CH2CONH2	0.06	0.07	0.08	-0.01	0.019099	0.017512
NHCSMe	0.24	0.12	0.3	-0.18	0.013746	0.010581
CSNHMe	0.3	0.34	0.29	0.05	0.020449	0.023572
CH=NNHCONHNH2	0.22	0.16	0.26	-0.1	-0.003018	-0.000605
CH(OH)Me	0.08	-0.07	0.16	-0.23	-0.005767	-0.005672
CH2OMe	0.08	0.01	0.13	-0.12	-0.002791	-0.001433
SO2Et	0.66	0.77	0.59	0.18	0.045696	0.047639
SEt	0.18	0.03	0.26	-0.23	0.004585	0.000639
P(Cl)NMe2	0.38	0.56	0.31	0.25	0.017564	0.019624
SiClMe2	0.16	0.21	0.16	0.05	0.011896	0.014573
SiFMe2	0.12	0.17	0.12	0.05	0.009014	0.012032
NHEt	-0.24	-0.61	-0.04	-0.57	-0.018165	-0.031238
N(Me)SO2Me	0.21	0.24	0.21	0.03	0.013984	0.016801
SO2NMe2	0.51	0.65	0.44	0.21	0.045242	0.048296
N(SO2Me)2	0.47	0.49	0.45	0.04	0.035486	0.04177
SN(Me)2	0.12	0.09	0.15	-0.06	-0.000299	-0.003782
N=NNMe2	-0.05	-0.03	-0.02	-0.01	-0.012379	-0.013662
P(O)Me2	0.43	0.5	0.4	0.1	0.019744	0.021422
PO(OMe)2	0.42	0.53	0.37	0.16	0.023626	0.028674
PMe2	0.03	0.06	0.05	0.01	-0.000303	-0.001381
SiH(Me)2	0.01	0.04	0.03	0.01	-0.001737	-0.000271
CCCF3	0.41	0.51	0.37	0.14	0.039205	0.042618
CF=CFCF3	0.39	0.46	0.36	0.1	0.03913	0.043459
N=C(CF3)2	0.29	0.23	0.32	-0.09	Excluded	Excluded
CF2CF2CF3	0.44	0.48	0.42	0.06	0.037954	0.041397
CF(CF3)2	0.37	0.53	0.31	0.22	0.037929	0.040064
SO2CF2CF2CF3	0.92	1.09	0.81	0.28	0.069756	0.072902
SO2CF(CF3)2	0.92	1.1	0.8	0.3	0.073253	0.07681
SCF2CF2CF3	0.45	0.48	0.43	0.05	0.035316	0.037604
SCF(CF3)2	0.48	0.51	0.46	0.03	0.037608	0.039783
C(OH)(CF3)2	0.29	0.3	0.29	0.01	0.036483	0.037798
CH(SCF3)2	0.44	0.44	0.43	0.01	0.038141	0.037897
CH(CN)2	0.53	0.52	0.52	0	0.032823	0.031452
CH=CHCF3-c	0.16	0.17	0.18	-0.01	0.020174	0.024398
CH=CHCF3-t	0.24	0.27	0.24	0.03	0.026667	0.028527
CCMe	0.21	0.03	0.29	-0.26	0.003769	0.005143
N(Me)COCF3	0.41	0.39	0.41	-0.02	0.025284	0.024284
cyclopropyl	-0.07	-0.21	0.02	-0.23	-0.005833	-0.008575
C(Me)=CH2	0.09	0.05	0.13	-0.08	-0.00056	-0.00034
CH=CHMe	0.02	-0.09	0.09	-0.18	-0.003788	-0.004762
CH2CH=CH2	-0.11	-0.14	-0.06	-0.08	-0.001294	-0.002946
C(Et)(NO2)2	0.56	0.64	0.51	0.13	0.034297	0.037327
OCH2CH=CH2	0.09	-0.25	0.25	-0.5	0.003634	-0.003824
COEt	0.38	0.48	0.34	0.14	0.0207	0.026868
COOEt	0.37	0.45	0.34	0.11	0.016484	0.023081
CH2OCOMe	0.04	0.05	0.07	-0.02	0.009912	0.011037
CH2CH2COOH	-0.03	-0.07	0.02	-0.09	0.00365	0.001697
SCH2CH=CH2	0.19	0.12	0.23	-0.11	0.00695	0.002423
SeCH2CH=CH2	0.21	0.12	0.26	-0.14	0.005513	0.001819
CH2NHCOMe	0.05	-0.05	0.12	-0.17	0.005539	0.004401
NHCOOEt	0.11	-0.15	0.23	-0.38	0.004316	-0.000649
C(NO2)Me2	0.18	0.2	0.19	0.01	0.014533	0.014186
isopropyl	-0.04	-0.15	0.04	-0.19	-0.006352	-0.008203
Pr	-0.06	-0.13	0.01	-0.14	-0.006024	-0.0079
NHCONHEt	0.04	-0.26	0.19	-0.45	-0.005799	-0.011541
NHCSNHEt	0.3	0.07	0.4	-0.33	0.000174	-0.005135
OCHMe2	0.1	-0.45	0.34	-0.79	-0.001267	-0.008781
OPr	0.1	-0.25	0.26	-0.51	8e-06	-0.007345
CH2CH(OH)Me	-0.12	-0.17	-0.06	-0.11	-0.01172	-0.012252
C(OOH)Me2	0.06	-0.14	0.17	-0.31	0.002234	0.003615
SCHMe2	0.23	0.07	0.3	-0.23	0.006861	0.006019
CH2NMe2	0	0.01	0.03	-0.02	-0.00562	-0.005733
GeMe3	0	0	0.03	-0.03	-0.005226	-0.004137
Si(Me)2OMe	0.04	-0.02	0.09	-0.11	-0.004024	-0.00078
OSiMe3	0.13	-0.27	0.31	-0.58	-0.00199	-0.006742
SiMe(OMe)2	0.04	0.1	0.05	0.05	-0.007591	-0.002963
Si(OMe)3	0.09	0.13	0.1	0.03	0.009481	0.014132
SiMe3	-0.04	-0.07	0.01	-0.08	-0.004666	-0.003373
cyclo-C4F7	0.48	0.53	0.45	0.08	0.033449	0.034757
COCF2CF2CF3	0.63	0.79	0.55	0.24	0.046987	0.056755
C(CF3)3	0.55	0.55	0.53	0.02	0.039285	0.04201
(CF2)3CF3	0.47	0.52	0.44	0.08	0.038065	0.041594
SO2C(CF3)3	0.96	1.13	0.84	0.29	0.081902	0.086417
SC(CF3)3	0.51	0.58	0.47	0.11	0.041	0.044936
C(SCF3)3	0.51	0.53	0.49	0.04	0.045759	0.048261
SeC(CF3)3	0.49	0.54	0.46	0.08	0.038136	0.041381
C(CN)3	0.97	0.96	0.92	0.04	0.065595	0.067206
cyclo-1-(OH)C4F6	0.36	0.37	0.36	0.01	0.018936	0.020896
CH=C(CN)2	0.66	0.84	0.57	0.27	0.044659	0.050677
2-(5-bromofuryl)	0.15	0	0.23	-0.23	0.008605	0.008416
1-pyrroline-2,5-dione	0.305	0.244	0.317	-0.073	0.01221	0.012531
3-chloro-1-pyrrolidine-2,5-dione	0.387	0.359	0.387	-0.028	0.018111	0.018822
3-pyridazinyl	0.28	0.48	0.21	0.27	0.009442	0.011776
C(Me)(CN)2	0.6	0.57	0.59	-0.02	0.041528	0.04516
2-furyl	0.06	0.02	0.1	-0.08	0.002954	0.002831
2-thienyl	0.09	0.05	0.13	-0.08	0.005754	0.005282
3-thienyl	0.03	-0.02	0.08	-0.1	0.00441	0.003579
2-selenienyl	0.06	0.04	0.1	-0.06	0.004407	0.003469
1-pyrryl	0.47	0.37	0.5	-0.13	0.012562	0.007151
1-pyrrolidine-2,5-dione	0.298	0.257	0.303	-0.046	0.010368	0.011299
cyclobutyl	-0.05	-0.14	0.02	-0.16	-0.005826	-0.007189
COCHMe2	0.38	0.47	0.35	0.12	0.018348	0.02462
NHCOCH(Me)2	0.11	-0.1	0.21	-0.31	0.0044	0.000244
CMe3	-0.1	-0.2	-0.02	-0.18	-0.007952	-0.009508
CH(Me)Et	-0.08	-0.12	-0.02	-0.1	-0.006652	-0.008478
CH2CH(Me)2	-0.07	-0.12	-0.01	-0.11	-0.005979	-0.007816
n-Bu	-0.08	-0.16	-0.01	-0.15	-0.006297	-0.008209
On-Bu	0.1	-0.32	0.29	-0.61	-0.000115	-0.007449
CH2C(OH)Me2	-0.16	-0.17	-0.11	-0.06	-0.008159	-0.009278
C(OMe)3	-0.03	-0.04	0.01	-0.05	0.005666	0.008768
AsEt2	0.22	0	0.32	-0.32	-0.000515	0.000258
As(O)Et2	0.57	0.44	0.6	-0.16	0.017418	0.018693
As(S)Et2	0.52	0.44	0.54	-0.1	0.01984	0.020736
NH(CH2)3CH3	-0.34	-0.51	-0.21	-0.3	-0.018667	-0.031737
NEt2	-0.23	-0.6	-0.1	-0.5	-0.021022	-0.033487
PO(Et)2	0.37	0.47	0.33	0.14	0.017821	0.019508
N=NPO(OEt)2	0.16	0.74	-0.05	0.79	0.0374	0.045858
P(Et)2	0.1	0.13	0.11	0.02	-0.001464	-0.002383
P(S)Et2	0.39	0.46	0.36	0.1	0.020218	0.021452
CH2OSi(Me)3	-0.04	-0.05	0	-0.05	-0.006071	-0.004808
CH2Si(Me)3	-0.16	-0.21	-0.09	-0.12	-0.008021	-0.011362
PO(NMe2)2	0.3	0.4	0.27	0.13	0.017135	0.021277
P(NMe2)2	0.18	0.25	0.17	0.08	-0.001314	0.001182
C(CN)=C(CN)2	0.77	0.98	0.65	0.33	0.054695	0.060021
2-(5-cyanofuryl)	0.25	0.1	0.32	-0.22	0.021689	0.022556
3-pyridyl	0.23	0.25	0.24	0.01	0.01094	0.01055
4-pyridyl	0.27	0.44	0.21	0.23	0.015702	0.015834
2-(4,6-dimethyl-s-triazinyl)	0.25	0.39	0.21	0.18	0.009377	0.01556
1-cyclopentenyl	-0.06	-0.05	-0.03	-0.02	-0.004537	-0.005102
cyclopentyl	-0.05	-0.14	0.02	-0.16	-0.007173	-0.008883
COCMe3	0.27	0.32	0.26	0.06	0.016375	0.02157
NHCO2n-Bu	0.06	-0.05	0.13	-0.18	0.004219	3.1e-05
CEt(Me)2	-0.06	-0.18	0.03	-0.21	-0.008397	-0.00987
CH2C(Me)3	-0.05	-0.17	0.03	-0.14	-0.006571	-0.007983
(CH2)4CH3	-0.08	-0.15	-0.01	-0.14	-0.006375	-0.008274
O(CH2)4CH3	0.1	-0.34	0.29	-0.63	0.005113	0.002327
CH2PO(OEt)2	0.12	0.06	0.17	-0.11	0.003699	0.004315
CH2CH2SiMe3	-0.16	-0.17	-0.11	-0.06	-0.006752	-0.008799
Si(Me)2OSiMe3	0	-0.01	0.04	-0.05	-0.006804	-0.004692
C6Cl5	0.25	0.24	0.27	-0.03	0.019046	0.018849
C6F5	0.26	0.27	0.27	0	0.023692	0.024872
P(O)(C3F7)2	0.95	1.1	0.84	0.26	0.057909	0.061509
OP(O)(C3F7)2	0.66	0.56	0.67	-0.11	0.036752	0.033273
NHP(O)(C3F7)2	0.28	0.18	0.33	-0.15	0.025497	0.018199
CH2Mn(CO)5	-0.14	-0.44	0.02	-0.46	-0.000739	-0.005411
C6H2-2,4,6-(NO2)3	0.26	0.3	0.26	0.04	0.028158	0.027742
C6H4-3-Br	0.09	0.08	0.12	-0.04	0.008958	0.008569
C6H4-4-Br	0.15	0.12	0.18	-0.06	0.00913	0.008492
C6H4-3-Cl	0.15	0.1	0.19	-0.09	0.009682	0.009271
C6H4-4-Cl	0.15	0.12	0.18	-0.06	0.009853	0.009152
C6H4-3-F	0.15	0.1	0.19	-0.09	0.009264	0.00891
C6H4-4-F	0.12	0.06	0.17	-0.11	0.008772	0.007923
OC6H4-4-F	-0.08	-0.1	-0.03	-0.07	0.016705	0.013567
C6H4-3-NO2	0.21	0.2	0.23	-0.03	0.018701	0.017807
C6H4-4-NO2	0.25	0.26	0.26	0	0.027643	0.027903
SC6H4-4-NO2	0.32	0.24	0.36	-0.12	0.026385	0.026266
SOC6H4-4-NO2	0.58	0.6	0.55	0.05	0.041528	0.040578
2-benzotriazolyl	0.49	0.51	0.47	0.04	0.020921	0.022743
N(O)=NSO2Ph	0.69	0.79	0.62	0.17	0.052792	0.058755
N=NPh	0.32	0.39	0.3	0.09	0.012851	0.01745
OPh	0.25	-0.03	0.37	-0.4	0.010489	0.007954
SOPh	0.5	0.44	0.51	-0.07	0.026075	0.026349
2-(5-acetylfuryl)	0.24	0.08	0.31	-0.23	0.022234	0.023141
2-(6-methylpyronyl)	0.38	0.43	0.36	0.07	0.025341	0.027632
SO2Ph	0.62	0.68	0.5	0.1	0.042875	0.044995
OSO2Ph	0.36	0.33	0.37	-0.04	0.016825	0.020909
SPh	0.23	0.07	0.3	-0.23	0.010646	0.011825
NHPh	-0.02	-0.56	0.22	-0.78	-0.001086	-0.0102
NHSO2Ph	0.33	0.03	0.43	-0.4	0.025706	0.02745
SO2NHPh	0.56	0.65	0.51	0.14	0.051886	0.054544
2-(5-ethylfuryl)	0.09	-0.13	0.2	-0.33	-0.000808	-0.001235
1-(2,5-dimethylpyrryl)	0.49	0.38	0.52	-0.14	0.017021	0.016379
1-cyclohexenyl	-0.1	-0.08	-0.07	-0.01	-0.006634	-0.007582
cyclohexyl	-0.05	-0.15	0.03	-0.18	-0.007469	-0.009136
N(n-Pr)2	-0.26	-0.6	-0.14	-0.46	-0.021261	-0.033746
(CH2)4NMe2	-0.08	-0.16	-0.01	-0.15	-0.005622	-0.007482
PO(i-Pr)2	0.37	0.41	0.36	0.05	0.01485	0.017101
P(i-Pr)2	0.02	0.06	0.04	0.02	-0.002689	-0.004085
P(O)(OPr)2	0.38	0.5	0.33	0.17	0.021317	0.026502
Ge(Et)3	0	0	0.03	-0.03	-0.007015	-0.006074
Si(OEt)3	0.02	0.08	0.03	0.05	-0.007856	-0.002233
P(=NSO2CF3)(C3F7)2	1.24	1.37	1.11	0.26	0.070715	0.074194
Si(NMe2)3	-0.04	-0.04	0	-0.04	-0.006589	-0.003575
2-benzoxazolyl	0.3	0.33	0.3	0.04	0.013811	0.016555
2-benzthiazolyl	0.27	0.29	0.27	0.02	0.011876	0.013819
COPh	0.34	0.43	0.31	0.12	0.016473	0.023348
OCOPh	0.21	0.13	0.26	-0.13	0.012471	0.010587
COOPh	0.37	0.44	0.34	0.1	0.021982	0.029163
CH=NPh	0.35	0.42	0.33	0.09	0.008285	0.011842
NHCOPh	0.02	-0.19	0.13	-0.32	0.005109	0.001216
CONHPh	0.23	0.41	0.17	0.24	0.021033	0.023946
C6H4-4-Me	0.06	-0.03	0.12	-0.15	-0.001443	-0.001857
CH2Ph	-0.08	-0.09	-0.04	-0.05	-0.00291	-0.004198
N=NPh-5-Me-2-OH	0.27	0.31	0.26	0.05	0.017938	0.021487
C6H4-4-OMe	0.05	-0.08	0.13	-0.21	-0.001242	-0.002024
CH(OH)Ph	0	-0.03	0.05	-0.08	0.006322	0.006067
CH2OPh	0.06	0.07	0.08	-0.01	0.004014	0.005296
CH2SO2Ph	0.15	0.16	0.17	-0.01	0.009951	0.01389
C(Et)3	-0.07	-0.2	0.02	-0.22	-0.008995	-0.010567
(CH2)6CH3	-0.07	-0.16	0	-0.16	-0.006497	-0.008358
SiMe(OSi(Me)3)2	-0.02	-0.01	0.01	-0.02	-0.004572	-0.001364
CF2CF2C6H4-4-F	0.34	0.39	0.32	0.07	0.024329	0.02776
C≡CPh	0.14	0.16	0.15	0.01	0.009032	0.010855
CH=NCOPh	0.39	0.51	0.34	0.17	0.025658	0.031072
CH=CHPh	0.03	-0.07	0.1	-0.17	0.001779	0.001457
CH2Fe(CO)2(pi-C5H5)	-0.26	-0.49	-0.11	-0.38	-0.008385	-0.011543
CH=NNHCOPh	0.39	0.51	0.34	0.17	0.01068	0.013285
NHCOC6H4-4-OMe	0.09	-0.06	0.17	-0.23	0.002445	-0.001439
SCH=NSO2C6H4-4-Me	0.65	0.7	0.61	0.09	0.036061	0.036102
C6H4-4-Et	0.07	-0.02	0.13	-0.15	-0.001491	-0.001882
CH2CH2Ph	-0.07	-0.12	-0.01	-0.11	-0.002352	-0.004307
SiPhMe2	0.04	0.07	0.06	0.01	-0.003528	-0.001583
S(Me)=NSO2C6H4-4-Me	0.65	0.7	0.61	0.09	0.032358	0.032765
PO(t-Bu)2	0.31	0.41	0.28	0.13	0.01255	0.015105
PO(n-Bu)2	0.35	0.49	0.3	0.19	0.016535	0.018329
PO(On-Bu)2	0.41	0.57	0.35	0.22	0.021107	0.026334
P(t-Bu)2	0.01	0.15	-0.01	0.16	-0.000895	0.000798
C6H5Cr(CO)3	0.29	0.14	0.36	-0.22	0.021937	0.021606
2-benzo-4-thiopyronyl	0.34	0.35	0.34	0.01	0.027526	0.030677
2-benzothiopyronyl	0.48	0.45	0.48	-0.03	0.024757	0.026763
2-(benzo-1,4-pyronyl)	0.41	0.4	0.41	-0.01	0.025339	0.028409
C6H4-4-CHMe2	0.08	0.01	0.13	-0.12	-0.001614	-0.001999
Si(OSiMe3)3	-0.09	-0.01	-0.08	0.07	-0.005357	-0.001375
ferrocenyl	-0.15	-0.18	-0.09	-0.09	-0.000881	-0.00197
C6H4-4-CMe3	0.07	0.01	0.12	-0.11	-0.001923	-0.002278
1-dibenzarsenyl	0.19	0.13	0.23	-0.1	0.002935	0.004656
1-dibenzoarsoxyl	0.17	0.09	0.22	-0.13	0.018624	0.021321
1-dibenzoarsazinyl	0.14	0.09	0.18	-0.09	0.000288	0.002186
AsPh2	0.03	0.09	0.04	0.05	0.002702	0.00381
AsOPh2	0.54	0.64	0.49	0.15	0.019054	0.021555
PPh2BCl3	0.67	0.72	0.62	0.1	0.030764	0.033237
NPh2	0	-0.22	0.12	-0.34	0.001874	-0.002194
POPh2	0.38	0.53	0.32	0.21	0.018338	0.02164
PPh2	0.11	0.19	0.1	0.09	0.004196	0.005738
PSPh2	0.29	0.47	0.23	0.24	0.019317	0.022018
P(NPr2)-C6H4-3-F	0.2	0.24	0.2	0.04	0.001143	0.000974
pyron-comp1	0.37	0.38	0.37	0.01	0.026055	0.028708
pyron-comp2	0.38	0.38	0.38	0	0.024004	0.026704
imidazole-comp1	0.17	0.21	0.17	0.04	0.005561	0.008718
CHPh2	-0.03	-0.05	0.01	-0.06	-0.002005	-0.002642
As-comp1	0.12	0.07	0.16	-0.09	-0.005827	-0.005452
POPh(Ph-4-Me)	0.13	0.3	0.09	0.21	0.016566	0.019959
CH2POPh2	0.14	0.01	0.21	-0.2	-0.006379	-0.006049
PS(Ph)(Ph-4-Me)	0.09	0.3	0.03	0.27	0.01892	0.021908
Si(Me)Ph2	0.1	0.13	0.11	0.02	-0.001743	0.000821
COOCHPh2	0.36	0.56	0.28	0.28	0.017015	0.023973
PO(Ph-4-Me)2	0.17	0.3	0.14	0.16	0.015002	0.018553
PS(Ph-4-Me)2	0.2	0.23	0.2	0.03	0.016926	0.019972
GePh3	0.05	0.08	0.07	0.01	-0.000878	0.001461
N=PPh3	-0.33	-0.77	-0.1	-0.67	-0.038225	-0.046732
SiPh3	-0.03	0.1	-0.04	0.14	-0.001103	0.001928
CPh3	-0.01	0.02	0.01	0.01	-0.003778	-0.003623
1-(1,2(BH)10-C2H)	0.49	0.43	0.5	-0.07	0.03122	0.029973
1-(1,7(BH)10-C2H)	0.25	0.33	0.23	0.1	0.015801	0.016185
2-(1,7(BH)10-C2H)	0.14	0.15	0.16	-0.01	0.013373	0.012994
4-(1,7(BH)10-C2H)	-0.02	0.02	0	0.02	0.000227	0.00247
3-(1,2(BH)10-C2H)	0.2	0.19	0.22	-0.03	0.015795	0.016953
1-(1,2(BH)10-C2Me)	0.5	0.65	0.43	0.22	0.032565	0.034459
CH2-1-(1,2(BH)10-C2H)	0.12	0.12	0.14	-0.02	0.013025	0.011243
CH2-1-(1,7(BH)10-C2H)	0	0.01	0.03	-0.02	0.003381	0.00229
2-(methylcarbonyl)carboran-1-yl	0.4	0.63	0.31	0.32	0.020975	0.023737
2-((carbonyloxy)methyl)carboran-1-yl	0.7	0.74	0.66	0.08	0.034172	0.037666
CH2-1-(1,2(BH)10-C2Me)	0.1	0.11	0.12	-0.01	0.010937	0.009364
1-adamantyl	-0.12	-0.13	-0.07	-0.06	-0.009587	-0.010793

## Sheet: MN15_6-311++g(d,p)_SMD
Functional Groups	σ_m	σ_p	F	R	Δq_{C,m}	Δq_{C,p}	ΔV_{m}	ΔV_{p}
Refernece Values for H	0	0	0	0	-0.048793	-0.048857	-14.769	-14.7691
H	0	0	0	0	0	0	0	0
Me	-0.07	-0.17	0.01	-0.18	-0.00213	-0.008363	-0.004234	-0.006807
CH=CH2	0.06	-0.04	0.13	-0.17	0.002225	0.001624	0.002496	0.002235
Ph	0.06	-0.01	0.12	-0.13	0.00262	0.000467	0.002421	0.001711
OAc	0.39	0.31	0.42	-0.11	0.011952	0.004637	0.010652	0.007658
NHCOCH3	0.21	0	0.31	-0.31	0.005092	-0.005961	0.004702	0.000135
OMe	0.12	-0.27	0.29	-0.56	0.003176	-0.016609	0.00079	-0.007755
OH	0.12	-0.37	0.33	-0.7	0.004003	-0.0169	0.004211	-0.00514
NH2	-0.16	-0.66	0.08	-0.74	-0.003669	-0.029648	-0.008475	-0.019968
F	0.34	0.06	0.45	-0.39	0.013545	-0.000537	0.019337	0.013133
Cl	0.37	0.23	0.42	-0.19	0.014331	0.00728	0.02097	0.018044
Br	0.39	0.23	0.45	-0.22	0.01446	0.008595	0.021089	0.01876
CHO	0.35	0.42	0.33	0.09	0.013184	0.027858	0.026363	0.032284
COMe	0.38	0.5	0.33	0.17	0.00984	0.022128	0.019254	0.024347
COOMe	0.37	0.45	0.34	0.11	0.011191	0.022482	0.015766	0.021423
COOH	0.37	0.45	0.34	0.11	0.012069	0.024426	0.018903	0.024786
COCl	0.51	0.61	0.46	0.15	0.019069	0.036694	0.03623	0.043611
CF3	0.43	0.54	0.38	0.16	0.016385	0.021952	0.028046	0.030203
CN	0.56	0.66	0.51	0.15	0.018885	0.029023	0.037662	0.04139
NO2	0.71	0.78	0.65	0.13	0.025008	0.037889	0.045742	0.050939
NHMe	-0.21	-0.7	0.03	-0.73	-0.0052	-0.032523	-0.011759	-0.023799
NMe2	-0.16	-0.6	0	-0.6	-0.005795	-0.031647	-0.013485	-0.02482
CHF2	0.29	0.32	0.29	0.03	0.011162	0.01576	0.019785	0.021347
COF	0.55	0.7	0.48	0.22	0.018144	0.034767	0.035299	0.042199
SH	0.25	0.15	0.3	-0.15	0.007834	-0.003614	0.010392	0.005362
NHNH2	-0.02	-0.55	0.22	-0.77	-0.001624	-0.026322	-0.001727	-0.013347
NO	0.62	0.91	0.49	0.42	0.020675	0.040998	0.037907	0.046619
CH2F	0.12	0.11	0.15	-0.04	0.005279	0.009077	0.01016	0.011457
CH2Cl	0.11	0.12	0.13	-0.01	0.005364	0.006671	0.010904	0.01092
CH2Br	0.12	0.14	0.14	0	0.005096	0.005845	0.010872	0.010589
CH2OH	0	0	0.03	-0.03	-0.00045	-0.006447	-0.005804	-0.007802
Et	-0.07	-0.15	0	-0.15	-0.002093	-0.007655	-0.004066	-0.006475
OEt	0.1	-0.24	0.26	-0.5	0.002797	-0.017074	-0.00033	-0.008813
CCH	0.21	0.23	0.22	0.01	0.009311	0.012698	0.012405	0.014494
BF2	0.32	0.48	0.26	0.22	0.008576	0.02416	0.019309	0.025783
GeBr3	0.66	0.73	0.61	0.12	0.019931	0.027372	0.033161	0.036352
SiBr3	0.48	0.57	0.44	0.13	0.017177	0.027092	0.027849	0.032341
SO2Cl	1.2	1.11	1.16	-0.05	0.031626	0.043611	0.054326	0.059332
SCl	0.44	0.48	0.42	0.06	0.016586	0.029042	0.029677	0.035087
POCl2	0.78	0.9	0.7	0.2	0.0244495	0.037032	0.04377	0.048896
PCl2	0.54	0.61	0.5	0.11	0.01723	0.027886	0.031458	0.035548
PSCl2	0.7	0.8	0.63	0.17	0.023952	0.033325	0.04162	0.045162
GeCl3	0.71	0.79	0.65	0.14	0.01946	0.027846	0.036604	0.03955
SiCl3	0.48	0.56	0.44	0.12	0.016481	0.027082	0.029066	0.033504
SOF	0.74	0.83	0.67	0.16	0.025157	0.035131	0.042341	0.04631
SO2F	0.8	0.91	0.72	0.19	0.031325	0.044802	0.054812	0.060399
POF2	0.81	0.89	0.74	0.15	0.023416	0.034963	0.044368	0.048473
PF2	0.49	0.59	0.44	0.15	0.015636	0.027634	0.028698	0.033508
GeF3	0.85	0.97	0.76	0.21	0.02142	0.032146	0.044918	0.048215
SF3	0.7	0.8	0.63	0.17	0.027562	0.038453	0.044423	0.04913
SiF3	0.54	0.69	0.47	0.22	0.016475	0.02862	0.031169	0.036092
PF4	0.63	0.8	0.54	0.26	0.014376	0.022007	0.028227	0.030834
SF5	0.61	0.68	0.56	0.12	0.026634	0.033126	0.04396	0.046359
ONO2	0.55	0.7	0.48	0.22	0.017642	0.009624	0.031797	0.027552
N3	0.37	0.08	0.48	-0.4	0.010727	0.00607	0.019712	0.017208
B(OH)2	-0.01	0.12	-0.03	0.15	0.001419	0.010351	0.003557	0.007321
NHOH	-0.04	-0.34	0.11	-0.45	0.001512	-0.018524	-0.001781	-0.010538
SO2NH2	0.53	0.6	0.49	0.11	0.021987	0.030381	0.034017	0.038208
PH2	0.06	0.05	0.09	-0.04	0.003858	-0.000767	0.006284	0.004076
GeH3	0	0.01	0.03	-0.02	0.002659	0.0046	0.004664	0.00552
SiH3	0.05	0.1	0.06	0.04	0.004701	0.009237	0.007402	0.009583
CBr3	0.28	0.29	0.28	0.01	0.016242	0.020383	0.024332	0.026302
CClF2	0.42	0.46	0.4	0.06	0.016836	0.021257	0.027807	0.02957
5-chloro-1-tetrazolyl	0.6	0.61	0.58	0.03	0.021332	0.023252	0.042874	0.04244
N=CCl2	0.21	0.13	0.26	-0.13	0.010345	0.003954	0.016265	0.013276
CCl3	0.4	0.46	0.38	0.09	0.016609	0.020856	0.025838	0.027721
OCCl3	0.43	0.35	0.46	-0.11	0.016045	0.0132	0.026333	0.024686
N=NCF3	0.56	0.68	0.5	0.18	0.018748	0.034241	0.035953	0.042364
OCF3	0.38	0.35	0.39	-0.04	0.016418	0.011986	0.026991	0.024719
SOCF3	0.63	0.69	0.58	0.11	0.024008	0.030566	0.040622	0.043174
SeOCF3	0.81	0.83	0.76	0.07	0.019711	0.024676	0.036407	0.037666
SO2CF3	0.83	0.96	0.74	0.22	0.030847	0.045383	0.05414	0.060298
SeO2CF3	1.08	1.21	0.97	0.24	0.029854	0.040336	0.057827	0.061045
OSO2CF3	0.56	0.53	0.56	-0.03	0.021638	0.017937	0.037049	0.034675
SCF3	0.4	0.5	0.36	0.14	0.015793	0.022348	0.027068	0.029906
SeCF3	0.44	0.45	0.43	0.02	0.013085	0.018568	0.02378	0.025848
NC	0.48	0.49	0.47	0.02	0.017465	0.018115	0.033117	0.032803
NCO	0.27	0.19	0.31	-0.12	0.011841	0.00657	0.024841	0.021712
OCN	0.67	0.54	0.69	-0.15	0.020882	0.01508	0.03939	0.035455
SO2CN	1.1	1.26	0.97	0.29	0.032749	0.047379	0.060285	0.065792
NCS	0.48	0.38	0.51	-0.13	0.014919	0.012754	0.031401	0.029432
SCN	0.51	0.52	0.49	0.03	0.018984	0.02403	0.035338	0.036753
SeCN	0.61	0.66	0.57	0.09	0.015303	0.014982	0.030154	0.028912
N=NCN	0.71	1.03	0.56	0.47	0.02207	0.043465	0.046826	0.055285
N(O)=NCN	0.78	0.89	0.7	0.19	0.027301	0.041476	0.056239	0.061139
C(NO2)3	0.72	0.82	0.65	0.17	0.029883	0.041083	0.054311	0.057588
CHBr2	0.31	0.32	0.31	0.01	0.011253	0.013931	0.019808	0.020489
CHCl2	0.31	0.32	0.31	0.01	0.011475	0.014425	0.02038	0.021149
OCHCl2	0.38	0.26	0.43	-0.17	0.012365	0.00841	0.017367	0.015517
OCHF2	0.31	0.18	0.37	-0.19	0.012162	0.006657	0.014848	0.012742
SOCHF2	0.54	0.58	0.51	0.07	0.021631	0.024087	0.039037	0.039421
SO2CHF2	0.75	0.86	0.67	0.19	0.028481	0.040949	0.052042	0.057149
SCHF2	0.33	0.37	0.32	0.05	0.012394	0.017423	0.015902	0.018666
S(O)(=NH)CF3	0.72	0.84	0.64	0.2	0.027169	0.039517	0.042723	0.04856
NHSO2CF3	0.44	0.39	0.45	-0.06	0.014036	0.007656	0.026639	0.022698
NHCN	0.21	0.06	0.28	-0.22	0.010321	-0.006587	0.021368	0.012661
1-(1H)-tetrazolyl	0.52	0.5	0.52	-0.02	0.018606	0.016133	0.040232	0.037568
5-(1H)-tetrazolyl	0.64	0.56	0.65	-0.09	0.014151	0.019793	0.032892	0.033924
5-hydroxy-1-tetrazolyl	0.39	0.33	0.41	-0.08	0.01752	0.016464	0.031399	0.030456
OCH2Cl	0.25	0.08	0.33	-0.25	0.010347	0.000735	0.014126	0.009553
OCH2F	0.2	0.02	0.29	-0.27	0.009699	0.000107	0.012843	0.00855
SCH2F	0.23	0.2	0.25	-0.05	0.009768	0.003066	0.013818	0.011148
NHCHO	0.19	0	0.28	-0.28	0.006315	-0.005072	0.009101	0.004074
CONH2	0.28	0.36	0.26	0.1	0.010056	0.017083	0.016736	0.01978
CSNH2	0.25	0.3	0.24	0.06	0.010663	0.017364	0.02037	0.022862
CH=NOH	0.22	0.1	0.28	-0.18	0.006959	0.010058	0.010254	0.011824
N(O)=NCONH2	0.59	0.63	0.56	0.07	0.021972	0.029783	0.036126	0.039677
CH2SO2Me	0.15	0.17	0.16	0.01	0.006891	0.008826	0.0036	0.004623
SiMeCl2	0.31	0.39	0.29	0.1	0.010723	0.018437	0.018424	0.021872
SiMeF2	0.29	0.23	0.32	-0.09	0.009399	0.017397	0.015853	0.019547
NHCONH2	-0.03	-0.24	0.09	-0.33	0.002981	-0.010352	-0.001982	-0.007207
N(Me)NO2	0.49	0.61	0.43	0.18	0.013957	0.014916	0.027343	0.026685
NHCSNH2	0.22	0.16	0.26	-0.1	0.005003	0.002022	0.004996	0.003172
SOMe	0.52	0.49	0.52	-0.03	0.016136	0.015621	0.026405	0.02612
S(OMe)	0.21	0.17	0.24	-0.07	0.009634	-0.000839	0.012473	0.008093
OS(=O)Me	0.44	0.45	0.43	0.02	0.012918	0.007128	0.014152	0.012267
S(O)OMe	0.5	0.54	0.47	0.07	0.018878	0.023628	0.024453	0.027211
SO2Me	0.6	0.72	0.53	0.19	0.02275	0.03059	0.038239	0.041906
SSO2Me	0.43	0.54	0.38	0.16	0.017395	0.025919	0.033328	0.036756
OSO2Me	0.39	0.36	0.4	-0.04	0.016619	0.012255	0.029503	0.027211
SMe	0.15	0	0.23	-0.23	0.004893	-0.007289	0.004497	-0.000787
SSMe	0.22	0.13	0.27	-0.14	0.010457	0.013989	0.017543	0.019391
SeMe	0.1	0	0.16	-0.16	0.004692	-0.005549	0.004681	0.000124
CH2NH2	-0.03	-0.11	0.04	-0.15	-0.001628	-0.004504	-0.005107	-0.00585
NHSO2Me	0.2	0.03	0.28	-0.25	0.009834	0.007517	0.009324	0.008545
N(COF)2	0.58	0.57	0.57	0	0.018318	0.019931	0.028777	0.0283
COCF3	0.63	0.8	0.54	0.26	0.019478	0.038021	0.03734	0.045066
SCOCF3	0.48	0.46	0.48	-0.02	0.017554	0.022554	0.028014	0.029648
OCOCF3	0.56	0.46	0.58	-0.12	0.017563	0.011465	0.02914	0.025542
N(CF3)C=O(F)	0.5	0.5	0.49	0.01	0.017932	0.02083	0.031615	0.031832
CF2CF3	0.47	0.52	0.44	0.08	0.017235	0.023213	0.029757	0.03206
OCF2CF3	0.48	0.28	0.55	-0.27	0.016663	0.012087	0.027855	0.025426
SO2CF2CF3	0.92	1.08	0.81	0.27	0.031035	0.046398	0.054364	0.060883
SCF2CF3	0.44	0.48	0.42	0.06	0.016396	0.023063	0.028262	0.031088
N(CF3)2	0.4	0.53	0.35	0.18	0.015199	0.005214	0.022488	0.017829
S(CF3)=NSO2CF3	1.18	1.28	1.07	0.21	0.031982	0.04184	0.064094	0.066705
SO(CF3)=NSO2CF3	1.23	1.4	1.09	0.31	0.036578	0.05133	0.070493	0.075762
N(SO2CF3)2	0.61	0.83	0.5	0.33	0.025893	0.033646	0.045313	0.047977
P(CF3)2	0.6	0.69	0.55	0.14	0.017385	0.02859	0.033237	0.037529
P(CN)2	0.82	0.9	0.75	0.15	0.019831	0.029654	0.042764	0.045419
OCF2CHFCl	0.35	0.28	0.38	-0.1	0.014845	0.009863	0.021064	0.019031
NHCOCF3	0.3	0.12	0.38	-0.26	0.011108	0.003198	0.02311	0.018691
CH=NSO2CF3	0.76	1	0.63	0.37	0.019489	0.0404	0.047385	0.05471
OCF2CHF2	0.34	0.25	0.38	-0.13	0.01486	0.009843	0.021166	0.019105
SCF2CHF2	0.38	0.47	0.35	0.12	0.014507	0.020402	0.022231	0.025224
C2N8S2H	0.63	0.64	0.6	0.04	0.02058	0.022641	0.033034	0.028597
SC≡CH	0.26	0.19	0.3	-0.11	0.013767	0.017195	0.019986	0.022004
SCH=CHCl	0.31	0.24	0.34	-0.1	0.011924	0.015197	0.023129	0.024444
SeCH=CHCl	0.28	0.26	0.3	-0.04	0.010208	0.013153	0.021172	0.022167
CH2CF3	0.12	0.09	0.15	-0.06	0.004817	0.004201	0.01043	0.009527
CH2SOCF3	0.25	0.24	0.27	-0.03	0.008964	0.010388	0.017458	0.017338
CH2SO2CF3	0.29	0.31	0.29	0.02	0.011252	0.0147	0.020214	0.02086
CH2SCF3	0.12	0.15	0.13	0.02	0.006085	0.00604	0.015944	0.014963
CH2CN	0.16	0.18	0.17	0.01	0.006406	0.004563	0.016364	0.014203
NHCOCH2Cl	0.17	-0.03	0.27	-0.3	0.006785	-0.003408	0.012297	0.007361
N(Me)SO2CF3	0.46	0.44	0.46	-0.02	0.014965	0.016261	0.028007	0.027735
C(Me)(NO2)2	0.54	0.61	0.5	0.11	0.014454	0.023973	0.031854	0.034774
oxiranyl	0.05	0.03	0.09	-0.06	0.003961	0.001388	0.00555	0.004403
OCH=CH2	0.21	-0.09	0.34	-0.43	0.007814	-0.009854	0.009403	0.001479
SCOMe	0.39	0.44	0.37	0.07	0.012011	0.015767	0.010262	0.012467
2-thiacylopropyl	0.04	0.01	0.08	-0.07	0.003371	0.000739	0.006402	0.004883
SCH=CH2	0.26	0.2	0.29	-0.09	0.010341	0.01306	0.017104	0.018753
SeCH=CH2	0.26	0.21	0.29	-0.08	0.008968	0.011423	0.015381	0.0168
1-aziridinyl	-0.07	-0.22	0.03	-0.25	0.002438	-0.005195	0.001279	-0.001894
2-aziridinyl	-0.06	-0.1	-0.01	-0.09	0.002712	-0.002596	0.007393	0.004231
N-methyl-3-oxaziridinyl	0.09	0.12	0.1	0.02	0.006348	0.008979	0.00715	0.008702
NHCOOMe	-0.02	-0.17	0.07	-0.24	0.005354	-0.008102	0.003906	-0.001603
CONHMe	0.35	0.36	0.35	0.01	0.00909	0.014001	0.013282	0.015874
CH=NOMe	0.37	0.3	0.4	-0.1	0.007035	0.010344	0.009799	0.011548
CH2CONH2	0.06	0.07	0.08	-0.01	0.004282	0.001623	0.020167	0.018219
NHCSMe	0.24	0.12	0.3	-0.18	0.007402	0.005665	0.01244	0.010764
CSNHMe	0.3	0.34	0.29	0.05	0.010661	0.017377	0.020378	0.022877
CH=NNHCONHNH2	0.22	0.16	0.26	-0.1	0.005808	0.009353	0.000179	0.002894
CH(OH)Me	0.08	-0.07	0.16	-0.23	0.000891	-0.002117	-0.004175	-0.004826
CH2OMe	0.08	0.01	0.13	-0.12	0.002014	0.002816	-0.00177	-0.000919
SO2Et	0.66	0.77	0.59	0.18	0.022632	0.030608	0.037252	0.041078
SEt	0.18	0.03	0.26	-0.23	0.00549	-0.00441	0.005277	0.001186
P(Cl)NMe2	0.38	0.56	0.31	0.25	0.009355	0.011959	0.013821	0.015326
SiClMe2	0.16	0.21	0.16	0.05	0.0051	0.011224	0.008751	0.011287
SiFMe2	0.12	0.17	0.12	0.05	0.004237	0.011262	0.006777	0.009866
NHEt	-0.24	-0.61	-0.04	-0.57	-0.005107	-0.031978	-0.011912	-0.023686
N(Me)SO2Me	0.21	0.24	0.21	0.03	0.010836	0.010766	0.008875	0.009263
SO2NMe2	0.51	0.65	0.44	0.21	0.022683	0.031111	0.034082	0.038661
N(SO2Me)2	0.47	0.49	0.45	0.04	0.017984	0.022904	0.030463	0.031947
SN(Me)2	0.12	0.09	0.15	-0.06	0.005028	-0.007494	0.000707	-0.004043
N=NNMe2	-0.05	-0.03	-0.02	-0.01	0.000209	-0.008626	-0.012134	-0.014255
P(O)Me2	0.43	0.5	0.4	0.1	0.009845	0.014849	0.017659	0.019821
PO(OMe)2	0.42	0.53	0.37	0.16	0.014663	0.023983	0.015105	0.020671
PMe2	0.03	0.06	0.05	0.01	0.001745	-0.001398	0.001751	0.000319
SiH(Me)2	0.01	0.04	0.03	0.01	0.000806	0.004159	-4.8e-05	0.001673
CCCF3	0.41	0.51	0.37	0.14	0.014831	0.022893	0.030783	0.033595
CF=CFCF3	0.39	0.46	0.36	0.1	0.014446	0.021945	0.029272	0.031834
N=C(CF3)2	0.29	0.23	0.32	-0.09	0.014455	0.010917	0.026461	0.024149
CF2CF2CF3	0.44	0.48	0.42	0.06	0.017169	0.023763	0.029821	0.032335
CF(CF3)2	0.37	0.53	0.31	0.22	0.01797	0.021793	0.029811	0.031189
SO2CF2CF2CF3	0.92	1.09	0.81	0.28	0.030896	0.046365	0.054386	0.06095
SO2CF(CF3)2	0.92	1.1	0.8	0.3	0.032505	0.047842	0.056246	0.062772
SCF2CF2CF3	0.45	0.48	0.43	0.05	0.016292	0.023103	0.028555	0.031428
SCF(CF3)2	0.48	0.51	0.46	0.03	0.017383	0.023423	0.02978	0.032218
C(OH)(CF3)2	0.29	0.3	0.29	0.01	0.014769	0.018199	0.028498	0.02917
CH(SCF3)2	0.44	0.44	0.43	0.01	0.015414	0.015172	0.029743	0.028745
CH(CN)2	0.53	0.52	0.52	0	0.014929	0.015763	0.034005	0.032349
CH=CHCF3-c	0.16	0.17	0.18	-0.01	0.008501	0.01574	0.015362	0.018414
CH=CHCF3-t	0.24	0.27	0.24	0.03	0.007633	0.012321	0.02051	0.021327
CCMe	0.21	0.03	0.29	-0.26	0.006163	0.006891	0.004304	0.005639
N(Me)COCF3	0.41	0.39	0.41	-0.02	0.011495	0.010159	0.019904	0.018468
cyclopropyl	-0.07	-0.21	0.02	-0.23	-0.001404	-0.009429	-0.004407	-0.007884
C(Me)=CH2	0.09	0.05	0.13	-0.08	0.001285	-1.6e-05	0.000655	0.000213
CH=CHMe	0.02	-0.09	0.09	-0.18	0.000216	-0.003222	-0.002423	-0.003699
CH2CH=CH2	-0.11	-0.14	-0.06	-0.08	-0.000133	-0.005065	-0.000354	-0.002431
C(Et)(NO2)2	0.56	0.64	0.51	0.13	0.016647	0.024131	0.031666	0.033779
OCH2CH=CH2	0.09	-0.25	0.25	-0.5	0.003878	-0.015448	0.002808	-0.005699
COEt	0.38	0.48	0.34	0.14	0.010108	0.022556	0.018872	0.024186
COOEt	0.37	0.45	0.34	0.11	0.010906	0.022105	0.014774	0.020474
CH2OCOMe	0.04	0.05	0.07	-0.02	0.004361	0.005936	0.009071	0.009516
CH2CH2COOH	-0.03	-0.07	0.02	-0.09	0.000111	-0.004356	0.00445	0.001793
SCH2CH=CH2	0.19	0.12	0.23	-0.11	0.00581	-0.005907	0.006704	0.001495
SeCH2CH=CH2	0.21	0.12	0.26	-0.14	0.005942	-0.001898	0.007986	0.004484
CH2NHCOMe	0.05	-0.05	0.12	-0.17	0.003456	0.002706	0.015641	0.014467
NHCOOEt	0.11	-0.15	0.23	-0.38	0.004998	-0.009441	0.002907	-0.002968
C(NO2)Me2	0.18	0.2	0.19	0.01	0.00877	0.008162	0.015033	0.014008
isopropyl	-0.04	-0.15	0.04	-0.19	-0.002014	-0.007558	-0.004232	-0.006635
Pr	-0.06	-0.13	0.01	-0.14	-0.002159	-0.007578	-0.004227	-0.006573
NHCONHEt	0.04	-0.26	0.19	-0.45	0.002301	-0.012045	-0.004334	-0.009818
NHCSNHEt	0.3	0.07	0.4	-0.33	0.003421	-0.001736	0.00097	-0.001578
OCHMe2	0.1	-0.45	0.34	-0.79	0.002542	-0.017736	-0.001251	-0.009814
OPr	0.1	-0.25	0.26	-0.51	0.002849	-0.016989	-0.000445	-0.008887
CH2CH(OH)Me	-0.12	-0.17	-0.06	-0.11	-0.002096	-0.006499	-0.010315	-0.011305
C(OOH)Me2	0.06	-0.14	0.17	-0.31	0.002852	0.002664	0.001343	0.001618
SCHMe2	0.23	0.07	0.3	-0.23	0.005801	-0.004509	0.007826	0.003652
CH2NMe2	0	0.01	0.03	-0.02	0.00022	-0.002551	-0.002408	-0.002988
GeMe3	0	0	0.03	-0.03	-0.001378	-0.000613	-0.00342	-0.002896
Si(Me)2OMe	0.04	-0.02	0.09	-0.11	0.001879	0.007502	-0.002929	0.000315
OSiMe3	0.13	-0.27	0.31	-0.58	0.004168	-0.010138	0.00158	-0.003918
SiMe(OMe)2	0.04	0.1	0.05	0.05	0.003006	0.008973	-0.006145	-0.001684
Si(OMe)3	0.09	0.13	0.1	0.03	0.006108	0.013174	0.005828	0.009957
SiMe3	-0.04	-0.07	0.01	-0.08	-0.000882	0.00165	-0.002895	-0.00153
cyclo-C4F7	0.48	0.53	0.45	0.08	0.014171	0.017273	0.026731	0.027239
COCF2CF2CF3	0.63	0.79	0.55	0.24	0.019356	0.038924	0.038005	0.04608
C(CF3)3	0.55	0.55	0.53	0.02	0.017591	0.023224	0.029882	0.031954
(CF2)3CF3	0.47	0.52	0.44	0.08	0.017082	0.023899	0.030156	0.032738
SO2C(CF3)3	0.96	1.13	0.84	0.29	0.031871	0.049232	0.056032	0.063348
SC(CF3)3	0.51	0.58	0.47	0.11	0.016378	0.025672	0.030343	0.034082
C(SCF3)3	0.51	0.53	0.49	0.04	0.020066	0.024506	0.034697	0.03597
SeC(CF3)3	0.49	0.54	0.46	0.08	0.014521	0.022936	0.029038	0.031992
C(CN)3	0.97	0.96	0.92	0.04	0.02346	0.03339	0.062733	0.063863
cyclo-1-(OH)C4F6	0.36	0.37	0.36	0.01	0.010867	0.01321	0.015188	0.016311
CH=C(CN)2	0.66	0.84	0.57	0.27	0.017103	0.034458	0.044077	0.049708
2-(5-bromofuryl)	0.15	0	0.23	-0.23	0.006053	0.00365	0.008556	0.007556
1-pyrroline-2,5-dione	0.305	0.244	0.317	-0.073	0.007086	0.000207	0.003773	0.001792
3-chloro-1-pyrrolidine-2,5-dione	0.387	0.359	0.387	-0.028	0.013506	0.014058	0.016715	0.016842
3-pyridazinyl	0.28	0.48	0.21	0.27	0.006452	0.008983	0.008307	0.009742
C(Me)(CN)2	0.6	0.57	0.59	-0.02	0.023043	0.035146	0.044415	0.048805
2-furyl	0.06	0.02	0.1	-0.08	0.00447	0.001278	0.002915	0.002023
2-thienyl	0.09	0.05	0.13	-0.08	0.00567	0.002649	0.005639	0.004762
3-thienyl	0.03	-0.02	0.08	-0.1	0.002708	-0.000359	0.00344	0.002167
2-selenienyl	0.06	0.04	0.1	-0.06	0.004328	0.001238	0.005035	0.003796
1-pyrryl	0.47	0.37	0.5	-0.13	0.007945	-0.004513	0.012828	0.006628
1-pyrrolidine-2,5-dione	0.298	0.257	0.303	-0.046	0.011668	0.011665	0.008849	0.009272
cyclobutyl	-0.05	-0.14	0.02	-0.16	-0.00194	-0.007693	-0.004386	-0.00682
COCHMe2	0.38	0.47	0.35	0.12	0.009636	0.019971	0.016722	0.021249
NHCOCH(Me)2	0.11	-0.1	0.21	-0.31	0.005014	-0.007056	0.004576	-0.000389
CMe3	-0.1	-0.2	-0.02	-0.18	-0.002598	-0.007442	-0.004997	-0.007227
CH(Me)Et	-0.08	-0.12	-0.02	-0.1	-0.002052	-0.007737	-0.00456	-0.006966
CH2CH(Me)2	-0.07	-0.12	-0.01	-0.11	-0.00159	-0.007349	-0.003563	-0.00591
n-Bu	-0.08	-0.16	-0.01	-0.15	-0.002191	-0.007737	-0.004396	-0.006794
On-Bu	0.1	-0.32	0.29	-0.61	0.002853	-0.016989	-0.000499	-0.008942
CH2C(OH)Me2	-0.16	-0.17	-0.11	-0.06	-0.001857	-0.005662	-0.006289	-0.007849
C(OMe)3	-0.03	-0.04	0.01	-0.05	0.006847	0.007122	0.005632	0.00748
AsEt2	0.22	0	0.32	-0.32	0.000976	0.001735	0.002195	0.002513
As(O)Et2	0.57	0.44	0.6	-0.16	0.009873	0.013318	0.01886	0.020173
As(S)Et2	0.52	0.44	0.54	-0.1	0.010285	0.013656	0.021893	0.022685
NH(CH2)3CH3	-0.34	-0.51	-0.21	-0.3	-0.005129	-0.032055	-0.012165	-0.02393
NEt2	-0.23	-0.6	-0.1	-0.5	-0.005976	-0.0313	-0.013514	-0.024621
PO(Et)2	0.37	0.47	0.33	0.14	0.009937	0.014447	0.016868	0.018978
N=NPO(OEt)2	0.16	0.74	-0.05	0.79	0.016813	0.030692	0.027039	0.033372
P(Et)2	0.1	0.13	0.11	0.02	0.001598	-0.001096	0.001464	0.000213
P(S)Et2	0.39	0.46	0.36	0.1	0.010366	0.015234	0.020284	0.022047
CH2OSi(Me)3	-0.04	-0.05	0	-0.05	0.000729	-0.005526	-0.001656	-0.004099
CH2Si(Me)3	-0.16	-0.21	-0.09	-0.12	-0.002526	-0.012611	-0.005947	-0.010011
PO(NMe2)2	0.3	0.4	0.27	0.13	0.010321	0.017486	0.012186	0.016558
P(NMe2)2	0.18	0.25	0.17	0.08	0.003545	0.006681	0.000732	0.00311
C(CN)=C(CN)2	0.77	0.98	0.65	0.33	0.023007	0.037191	0.052674	0.056712
2-(5-cyanofuryl)	0.25	0.1	0.32	-0.22	0.009185	0.010851	0.020867	0.020719
3-pyridyl	0.23	0.25	0.24	0.01	0.004737	0.003522	0.010474	0.009505
4-pyridyl	0.27	0.44	0.21	0.23	0.006078	0.006938	0.015201	0.014852
2-(4,6-dimethyl-s-triazinyl)	0.25	0.39	0.21	0.18	0.007873	0.01744	0.00772	0.013007
1-cyclopentenyl	-0.06	-0.05	-0.03	-0.02	6e-05	-0.002642	-0.002383	-0.003281
cyclopentyl	-0.05	-0.14	0.02	-0.16	-0.002322	-0.007779	-0.005217	-0.007499
COCMe3	0.27	0.32	0.26	0.06	0.008865	0.017894	0.015268	0.019195
NHCO2n-Bu	0.06	-0.05	0.13	-0.18	0.005056	-0.005188	0.00424	4.3e-05
CEt(Me)2	-0.06	-0.18	0.03	-0.21	-0.002884	-0.007789	-0.005712	-0.007928
CH2C(Me)3	-0.05	-0.17	0.03	-0.14	-0.002406	-0.006957	-0.003778	-0.0057
(CH2)4CH3	-0.08	-0.15	-0.01	-0.14	-0.002195	-0.007745	-0.0044	-0.006797
O(CH2)4CH3	0.1	-0.34	0.29	-0.63	0.005009	-0.004378	0.004631	0.000879
CH2PO(OEt)2	0.12	0.06	0.17	-0.11	0.007864	0.003878	0.002533	0.002452
CH2CH2SiMe3	-0.16	-0.17	-0.11	-0.06	-0.002435	-0.008506	-0.005029	-0.007608
Si(Me)2OSiMe3	0	-0.01	0.04	-0.05	0.000214	0.003405	-0.005036	-0.002704
C6Cl5	0.25	0.24	0.27	-0.03	0.009478	0.010459	0.017666	0.017465
C6F5	0.26	0.27	0.27	0	0.009658	0.012185	0.019491	0.019879
P(O)(C3F7)2	0.95	1.1	0.84	0.26	0.025944	0.04074	0.048764	0.054389
OP(O)(C3F7)2	0.66	0.56	0.67	-0.11	0.019985	0.011564	0.032837	0.028604
NHP(O)(C3F7)2	0.28	0.18	0.33	-0.15	0.013308	-0.000806	0.024152	0.016945
CH2Mn(CO)5	-0.14	-0.44	0.02	-0.46	-0.003285	-0.016294	-0.004412	-0.010878
C6H2-2,4,6-(NO2)3	0.26	0.3	0.26	0.04	0.016589	0.019517	0.027356	0.026687
C6H4-3-Br	0.09	0.08	0.12	-0.04	0.004513	0.003337	0.009328	0.008486
C6H4-4-Br	0.15	0.12	0.18	-0.06	0.003923	0.002368	0.009605	0.008484
C6H4-3-Cl	0.15	0.1	0.19	-0.09	0.004447	0.003257	0.00926	0.008409
C6H4-4-Cl	0.15	0.12	0.18	-0.06	0.003842	0.002195	0.009368	0.008224
C6H4-3-F	0.15	0.1	0.19	-0.09	0.004225	0.002982	0.008395	0.007592
C6H4-4-F	0.12	0.06	0.17	-0.11	0.003162	0.000847	0.007411	0.006094
OC6H4-4-F	-0.08	-0.1	-0.03	-0.07	0.009154	0.000581	0.013502	0.009541
C6H4-3-NO2	0.21	0.2	0.23	-0.03	0.006014	0.005537	0.017454	0.016102
C6H4-4-NO2	0.25	0.26	0.26	0	0.007032	0.008473	0.022843	0.02201
SC6H4-4-NO2	0.32	0.24	0.36	-0.12	0.011011	0.013289	0.024198	0.024428
SOC6H4-4-NO2	0.58	0.6	0.55	0.05	0.02075	0.024466	0.040336	0.040982
2-benzotriazolyl	0.49	0.51	0.47	0.04	0.01695	0.018795	0.021296	0.022546
N(O)=NSO2Ph	0.69	0.79	0.62	0.17	0.02602	0.037635	0.047047	0.051726
N=NPh	0.32	0.39	0.3	0.09	0.010104	0.016238	0.011337	0.014818
OPh	0.25	-0.03	0.37	-0.4	0.008726	8.3e-05	0.008944	0.005477
SOPh	0.5	0.44	0.51	-0.07	0.017054	0.016293	0.022464	0.022628
2-(5-acetylfuryl)	0.24	0.08	0.31	-0.23	0.00832	0.009685	0.019705	0.01946
2-(6-methylpyronyl)	0.38	0.43	0.36	0.07	0.01093	0.016249	0.024823	0.026206
SO2Ph	0.62	0.68	0.5	0.1	0.023274	0.030578	0.033326	0.037316
OSO2Ph	0.36	0.33	0.37	-0.04	0.015978	0.012238	0.013425	0.012855
SPh	0.23	0.07	0.3	-0.23	0.008934	0.010515	0.010188	0.011556
NHPh	-0.02	-0.56	0.22	-0.78	0.000244	-0.020433	-0.000618	-0.009939
NHSO2Ph	0.33	0.03	0.43	-0.4	0.012034	0.008179	0.022229	0.021087
SO2NHPh	0.56	0.65	0.51	0.14	0.02354	0.03125	0.038019	0.042183
2-(5-ethylfuryl)	0.09	-0.13	0.2	-0.33	0.003454	-0.000843	-8.3e-05	-0.001273
1-(2,5-dimethylpyrryl)	0.49	0.38	0.52	-0.14	0.009393	0.006327	0.017126	0.015724
1-cyclohexenyl	-0.1	-0.08	-0.07	-0.01	-0.000493	-0.004154	-0.003747	-0.004951
cyclohexyl	-0.05	-0.15	0.03	-0.18	-0.002217	-0.007575	-0.005046	-0.007298
N(n-Pr)2	-0.26	-0.6	-0.14	-0.46	-0.007427	-0.036868	-0.016306	-0.029174
(CH2)4NMe2	-0.08	-0.16	-0.01	-0.15	-0.002786	-0.008803	-0.004608	-0.007355
PO(i-Pr)2	0.37	0.41	0.36	0.05	0.011151	0.016022	0.017048	0.019313
P(i-Pr)2	0.02	0.06	0.04	0.02	0.002351	-0.00167	0.001435	-7.7e-05
P(O)(OPr)2	0.38	0.5	0.33	0.17	0.014288	0.023473	0.013083	0.018782
Ge(Et)3	0	0	0.03	-0.03	-0.001782	-0.00125	-0.004091	-0.003641
Si(OEt)3	0.02	0.08	0.03	0.05	0.004653	0.011417	-0.00759	-0.002319
P(=NSO2CF3)(C3F7)2	1.24	1.37	1.11	0.26	0.031608	0.048666	0.065868	0.071514
Si(NMe2)3	-0.04	-0.04	0	-0.04	-0.000893	0.003272	-0.007368	-0.004319
2-benzoxazolyl	0.3	0.33	0.3	0.04	0.01149	0.015123	0.0142	0.016189
2-benzthiazolyl	0.27	0.29	0.27	0.02	0.010405	0.012412	0.011955	0.013384
COPh	0.34	0.43	0.31	0.12	0.009185	0.02279	0.014668	0.020707
OCOPh	0.21	0.13	0.26	-0.13	0.012301	0.004938	0.009875	0.007085
COOPh	0.37	0.44	0.34	0.1	0.012794	0.025449	0.01956	0.025701
CH=NPh	0.35	0.42	0.33	0.09	0.006859	0.013538	0.009921	0.013082
NHCOPh	0.02	-0.19	0.13	-0.32	0.005729	-0.004171	0.004775	0.000742
CONHPh	0.23	0.41	0.17	0.24	0.011007	0.01753	0.019577	0.022272
C6H4-4-Me	0.06	-0.03	0.12	-0.15	0.001873	-0.000949	-0.000144	-0.000985
CH2Ph	-0.08	-0.09	-0.04	-0.05	0.000287	-0.004884	-0.002084	-0.004349
N=NPh-5-Me-2-OH	0.27	0.31	0.26	0.05	0.01024	0.015769	0.01592	0.018361
C6H4-4-OMe	0.05	-0.08	0.13	-0.21	0.001484	-0.002054	-0.000518	-0.001716
CH(OH)Ph	0	-0.03	0.05	-0.08	0.003376	0.000303	0.005723	0.004185
CH2OPh	0.06	0.07	0.08	-0.01	0.003231	0.003137	0.003596	0.003692
CH2SO2Ph	0.15	0.16	0.17	-0.01	0.007524	0.009969	0.00263	0.004132
C(Et)3	-0.07	-0.2	0.02	-0.22	-0.003514	-0.008763	-0.006589	-0.008997
(CH2)6CH3	-0.07	-0.16	0	-0.16	-0.00221	-0.007721	-0.004428	-0.006813
SiMe(OSi(Me)3)2	-0.02	-0.01	0.01	-0.02	0.002412	0.006172	-0.00147	0.001347
CF2CF2C6H4-4-F	0.34	0.39	0.32	0.07	0.013896	0.019302	0.018499	0.021315
C≡CPh	0.14	0.16	0.15	0.01	0.008182	0.010634	0.009404	0.011176
CH=NCOPh	0.39	0.51	0.34	0.17	0.011966	0.024628	0.023615	0.028756
CH=CHPh	0.03	-0.07	0.1	-0.17	0.002059	0.000862	0.002756	0.002113
CH2Fe(CO)2(pi-C5H5)	-0.26	-0.49	-0.11	-0.38	-0.004557	-0.01643	-0.007121	-0.011663
CH=NNHCOPh	0.39	0.51	0.34	0.17	0.007407	0.011726	0.011037	0.013083
NHCOC6H4-4-OMe	0.09	-0.06	0.17	-0.23	0.005201	-0.004905	0.001971	-0.001926
SCH=NSO2C6H4-4-Me	0.65	0.7	0.61	0.09	0.016916	0.018381	0.03493	0.034525
C6H4-4-Et	0.07	-0.02	0.13	-0.15	0.001941	-0.000805	-1.4e-05	-0.000828
CH2CH2Ph	-0.07	-0.12	-0.01	-0.11	-0.001157	-0.006134	-0.000749	-0.003199
SiPhMe2	0.04	0.07	0.06	0.01	0.001346	0.004713	0.000681	0.00268
S(Me)=NSO2C6H4-4-Me	0.65	0.7	0.61	0.09	0.022238	0.026898	0.032968	0.034499
PO(t-Bu)2	0.31	0.41	0.28	0.13	0.009347	0.0144	0.013407	0.016312
PO(n-Bu)2	0.35	0.49	0.3	0.19	0.009728	0.014144	0.01607	0.018199
PO(On-Bu)2	0.41	0.57	0.35	0.22	0.014325	0.023589	0.01299	0.018737
P(t-Bu)2	0.01	0.15	-0.01	0.16	0.002493	0.005718	0.003236	0.00509
C6H5Cr(CO)3	0.29	0.14	0.36	-0.22	0.007338	0.007079	0.01513	0.013686
2-benzo-4-thiopyronyl	0.34	0.35	0.34	0.01	0.012462	0.020007	0.027864	0.030105
2-benzothiopyronyl	0.48	0.45	0.48	-0.03	0.012816	0.016429	0.023751	0.024916
2-(benzo-1,4-pyronyl)	0.41	0.4	0.41	-0.01	0.011622	0.01821	0.024831	0.02689
C6H4-4-CHMe2	0.08	0.01	0.13	-0.12	0.001914	-0.000857	-3.5e-05	-0.000876
Si(OSiMe3)3	-0.09	-0.01	-0.08	0.07	0.003152	0.008148	-0.004571	-0.000725
ferrocenyl	-0.15	-0.18	-0.09	-0.09	0.00202	-0.00303	0.00091	-0.000855
C6H4-4-CMe3	0.07	0.01	0.12	-0.11	0.002001	-0.000652	4e-06	-0.000752
1-dibenzarsenyl	0.19	0.13	0.23	-0.1	0.00425	0.006286	0.003517	0.005057
1-dibenzoarsoxyl	0.17	0.09	0.22	-0.13	0.01257	0.017394	0.018349	0.021121
1-dibenzoarsazinyl	0.14	0.09	0.18	-0.09	0.005004	0.007256	0.001281	0.003066
AsPh2	0.03	0.09	0.04	0.05	0.004758	0.004641	0.004554	0.005399
AsOPh2	0.54	0.64	0.49	0.15	0.012382	0.01712	0.018855	0.021304
PPh2BCl3	0.67	0.72	0.62	0.1	0.018112	0.025527	0.029848	0.033487
NPh2	0	-0.22	0.12	-0.34	0.003534	-0.009303	0.002908	-0.001987
POPh2	0.38	0.53	0.32	0.21	0.012315	0.018656	0.015319	0.019056
PPh2	0.11	0.19	0.1	0.09	0.006815	0.00747	0.005991	0.007637
PSPh2	0.29	0.47	0.23	0.24	0.013139	0.019358	0.018473	0.021832
P(NPr2)-C6H4-3-F	0.2	0.24	0.2	0.04	0.003659	0.001305	0.002466	0.001827
pyron-comp1	0.37	0.38	0.37	0.01	0.01169	0.017881	0.025896	0.027579
pyron-comp2	0.38	0.38	0.38	0	0.011276	0.017125	0.02384	0.025595
imidazole-comp1	0.17	0.21	0.17	0.04	0.008309	0.011703	0.008426	0.011076
CHPh2	-0.03	-0.05	0.01	-0.06	0.002325	-0.002142	4.6e-05	-0.001109
As-comp1	0.12	0.07	0.16	-0.09	0.001959	-0.001706	-0.003725	-0.00394
POPh(Ph-4-Me)	0.13	0.3	0.09	0.21	0.011939	0.017998	0.013475	0.01729
CH2POPh2	0.14	0.01	0.21	-0.2	0.002837	-0.000565	-0.004072	-0.004105
PS(Ph)(Ph-4-Me)	0.09	0.3	0.03	0.27	0.014005	0.019862	0.018777	0.022651
Si(Me)Ph2	0.1	0.13	0.11	0.02	0.00176	0.00574	-0.001336	0.001559
COOCHPh2	0.36	0.56	0.28	0.28	0.012084	0.02392	0.017017	0.022956
PO(Ph-4-Me)2	0.17	0.3	0.14	0.16	0.011609	0.017435	0.011793	0.01569
PS(Ph-4-Me)2	0.2	0.23	0.2	0.03	0.012518	0.018618	0.015373	0.018976
GePh3	0.05	0.08	0.07	0.01	0.00308	0.005242	0.000798	0.002741
N=PPh3	-0.33	-0.77	-0.1	-0.67	-0.009181	-0.032244	-0.032308	-0.039676
SiPh3	-0.03	0.1	-0.04	0.14	0.003635	0.007895	0.0003	0.003486
CPh3	-0.01	0.02	0.01	0.01	0.002382	-0.001246	-0.001059	-0.001858
1-(1,2(BH)10-C2H)	0.49	0.43	0.5	-0.07	0.01331	0.012533	0.031047	0.028976
1-(1,7(BH)10-C2H)	0.25	0.33	0.23	0.1	0.009342	0.00885	0.01632	0.01575
2-(1,7(BH)10-C2H)	0.14	0.15	0.16	-0.01	0.003151	0.003818	0.013367	0.01223
4-(1,7(BH)10-C2H)	-0.02	0.02	0	0.02	2.7e-05	0.00214	0.00038	0.001444
3-(1,2(BH)10-C2H)	0.2	0.19	0.22	-0.03	0.003086	0.006343	0.015389	0.015566
1-(1,2(BH)10-C2Me)	0.5	0.65	0.43	0.22	0.012881	0.016087	0.031213	0.031448
CH2-1-(1,2(BH)10-C2H)	0.12	0.12	0.14	-0.02	0.005486	0.003005	0.012968	0.010591
CH2-1-(1,7(BH)10-C2H)	0	0.01	0.03	-0.02	0.004092	0.00084	0.003811	0.002033
2-(methylcarbonyl)carboran-1-yl	0.4	0.63	0.31	0.32	0.012765	0.016233	0.019153	0.019927
2-((carbonyloxy)methyl)carboran-1-yl	0.7	0.74	0.66	0.08	0.015279	0.01857	0.035293	0.036075
CH2-1-(1,2(BH)10-C2Me)	0.1	0.11	0.12	-0.01	0.005442	0.002763	0.011733	0.009414
1-adamantyl	-0.12	-0.13	-0.07	-0.06	-0.002781	-0.0074	-0.006806	-0.008716

## Sheet: MN15_6-311++g(d,p)
Functional Groups	σ_m	σ_p	F	R	Δq_{C,m}	Δq_{C,p}	ΔV_{m}	ΔV_{p}
Refernece Values for H	0	0	0	0	-0.040088	-0.040088	-14.7616	-14.7616
H	0	0	0	0	0	0	0	0
Me	-0.07	-0.17	0.01	-0.18	-0.00072	-0.005919	-0.002811	-0.004795
CH=CH2	0.06	-0.04	0.13	-0.17	0.001365	0.000669	0.002282	0.001825
Ph	0.06	-0.01	0.12	-0.13	0.00139	-0.000883	0.001865	0.000881
OAc	0.39	0.31	0.42	-0.11	0.006478	-0.0016	0.007663	0.003856
NHCOCH3	0.21	0	0.31	-0.31	0.003752	-0.008692	0.003003	-0.002344
OMe	0.12	-0.27	0.29	-0.56	0.002287	-0.015775	0.000786	-0.007341
OH	0.12	-0.37	0.33	-0.7	0.004187	-0.015277	0.004135	-0.004542
NH2	-0.16	-0.66	0.08	-0.74	0.000339	-0.022775	-0.004681	-0.014517
F	0.34	0.06	0.45	-0.39	0.008743	-0.005104	0.014495	0.007795
Cl	0.37	0.23	0.42	-0.19	0.008489	0.001401	0.015073	0.011474
Br	0.39	0.23	0.45	-0.22	0.008592	0.002716	0.01525	0.012193
CHO	0.35	0.42	0.33	0.09	0.00692	0.017283	0.017683	0.021294
COMe	0.38	0.5	0.33	0.17	0.004333	0.013385	0.012132	0.015351
COOMe	0.37	0.45	0.34	0.11	0.004258	0.013113	0.009829	0.013332
COOH	0.37	0.45	0.34	0.11	0.005549	0.015537	0.01319	0.017046
COCl	0.51	0.61	0.46	0.15	0.009878	0.022721	0.02461	0.029106
CF3	0.43	0.54	0.38	0.16	0.010217	0.014138	0.020922	0.021827
CN	0.56	0.66	0.51	0.15	0.011475	0.017694	0.026767	0.028519
NO2	0.71	0.78	0.65	0.13	0.013836	0.021559	0.03167	0.033617
NHMe	-0.21	-0.7	0.03	-0.73	-0.000876	-0.024904	-0.007086	-0.017365
NMe2	-0.16	-0.6	0	-0.6	-0.001922	-0.025356	-0.008882	-0.018953
CHF2	0.29	0.32	0.29	0.03	0.006597	0.007828	0.013316	0.013366
COF	0.55	0.7	0.48	0.22	0.009666	0.021768	0.024261	0.028527
SH	0.25	0.15	0.3	-0.15	0.005631	-0.005501	0.008036	0.002927
NHNH2	-0.02	-0.55	0.22	-0.77	0.001295	-0.021351	-0.000797	-0.010917
NO	0.62	0.91	0.49	0.42	0.009815	0.022394	0.024503	0.028724
CH2F	0.12	0.11	0.15	-0.04	0.003303	-0.000768	0.005347	0.003379
CH2Cl	0.11	0.12	0.13	-0.01	0.004614	0.005249	0.008857	0.008802
CH2Br	0.12	0.14	0.14	0	0.004644	0.004933	0.008873	0.008659
CH2OH	0	0	0.03	-0.03	-0.000509	-0.005405	-0.00432	-0.006211
Et	-0.07	-0.15	0	-0.15	-0.00062	-0.005328	-0.002551	-0.004431
OEt	0.1	-0.24	0.26	-0.5	0.00188	-0.016251	-0.000215	-0.008301
CCH	0.21	0.23	0.22	0.01	0.004381	0.006275	0.008624	0.009282
BF2	0.32	0.48	0.26	0.22	0.00451	0.018386	0.013878	0.019359
GeBr3	0.66	0.73	0.61	0.12	0.011443	0.017252	0.022829	0.024611
SiBr3	0.48	0.57	0.44	0.13	0.00935	0.017319	0.018958	0.021833
SO2Cl	1.2	1.11	1.16	-0.05	0.018059	0.025645	0.037554	0.039505
SCl	0.44	0.48	0.42	0.06	0.008802	0.017977	0.020541	0.023835
POCl2	0.78	0.9	0.7	0.2	0.014885	0.022886	0.03091	0.033142
PCl2	0.54	0.61	0.5	0.11	0.010286	0.01848	0.022138	0.024776
PSCl2	0.7	0.8	0.63	0.17	0.014241	0.020759	0.028903	0.030584
GeCl3	0.71	0.79	0.65	0.14	0.012365	0.018781	0.025403	0.027392
SiCl3	0.48	0.56	0.44	0.12	0.009678	0.018004	0.020187	0.023201
SOF	0.74	0.83	0.67	0.16	0.013904	0.019198	0.028299	0.029371
SO2F	0.8	0.91	0.72	0.19	0.017763	0.026467	0.037845	0.040255
POF2	0.81	0.89	0.74	0.15	0.014967	0.02288	0.031868	0.034152
PF2	0.49	0.59	0.44	0.15	0.009263	0.018678	0.02058	0.023837
GeF3	0.85	0.97	0.76	0.21	0.014676	0.02293	0.032162	0.034706
SF3	0.7	0.8	0.63	0.17	0.0149	0.024356	0.031123	0.03402
SiF3	0.54	0.69	0.47	0.22	0.010002	0.01947	0.022195	0.025663
PF4	0.63	0.8	0.54	0.26	0.008805	0.014971	0.020111	0.021907
SF5	0.61	0.68	0.56	0.12	0.015626	0.019784	0.03096	0.031467
ONO2	0.55	0.7	0.48	0.22	0.011178	0.002391	0.021983	0.017162
N3	0.37	0.08	0.48	-0.4	0.007103	0.00236	0.014852	0.012131
B(OH)2	-0.01	0.12	-0.03	0.15	0.000316	0.008332	0.002661	0.005895
NHOH	-0.04	-0.34	0.11	-0.45	0.002286	-0.015931	-0.000691	-0.008637
SO2NH2	0.53	0.6	0.49	0.11	0.011738	0.016234	0.021775	0.023079
PH2	0.06	0.05	0.09	-0.04	0.003576	-0.000861	0.00548	0.003447
GeH3	0	0.01	0.03	-0.02	0.002332	0.004148	0.004138	0.004969
SiH3	0.05	0.1	0.06	0.04	0.002573	0.006456	0.005145	0.00684
CBr3	0.28	0.29	0.28	0.01	0.008805	0.011632	0.016697	0.017177
CClF2	0.42	0.46	0.4	0.06	0.010282	0.013094	0.020377	0.020834
5-chloro-1-tetrazolyl	0.6	0.61	0.58	0.03	0.014008	0.013694	0.031096	0.029604
N=CCl2	0.21	0.13	0.26	-0.13	0.006431	0.000733	0.012251	0.009166
CCl3	0.4	0.46	0.38	0.09	0.009413	0.012206	0.018166	0.018632
OCCl3	0.43	0.35	0.46	-0.11	0.009648	0.006498	0.019388	0.016985
N=NCF3	0.56	0.68	0.5	0.18	0.010125	0.020926	0.02526	0.028829
OCF3	0.38	0.35	0.39	-0.04	0.010783	0.006185	0.020593	0.017773
SOCF3	0.63	0.69	0.58	0.11	0.013769	0.017176	0.027668	0.027972
SeOCF3	0.81	0.83	0.76	0.07	0.013603	0.016742	0.026674	0.026992
SO2CF3	0.83	0.96	0.74	0.22	0.017244	0.027594	0.037301	0.040447
SeO2CF3	1.08	1.21	0.97	0.24	0.019198	0.027609	0.040755	0.042999
OSO2CF3	0.56	0.53	0.56	-0.03	0.014246	0.010546	0.026274	0.023746
SCF3	0.4	0.5	0.36	0.14	0.009312	0.01457	0.019792	0.02148
SeCF3	0.44	0.45	0.43	0.02	0.009143	0.013979	0.018842	0.020436
NC	0.48	0.49	0.47	0.02	0.010782	0.009176	0.023684	0.022077
NCO	0.27	0.19	0.31	-0.12	0.007657	0.001346	0.017132	0.013658
OCN	0.67	0.54	0.69	-0.15	0.015455	0.009498	0.030355	0.026471
SO2CN	1.1	1.26	0.97	0.29	0.019758	0.029746	0.04264	0.045313
NCS	0.48	0.38	0.51	-0.13	0.009383	0.005165	0.02132	0.018556
SCN	0.51	0.52	0.49	0.03	0.012378	0.016375	0.026334	0.027085
SeCN	0.61	0.66	0.57	0.09	0.024691	0.014462	0.049066	0.042744
N=NCN	0.71	1.03	0.56	0.47	0.011846	0.025475	0.031344	0.03585
N(O)=NCN	0.78	0.89	0.7	0.19	0.016439	0.025008	0.039527	0.041496
C(NO2)3	0.72	0.82	0.65	0.17	0.018076	0.02783	0.038678	0.041176
CHBr2	0.31	0.32	0.31	0.01	0.007616	0.009204	0.014756	0.014808
CHCl2	0.31	0.32	0.31	0.01	0.007905	0.009649	0.015374	0.0155
OCHCl2	0.38	0.26	0.43	-0.17	0.007766	0.003649	0.013615	0.011085
OCHF2	0.31	0.18	0.37	-0.19	0.007841	0.002348	0.012031	0.009233
SOCHF2	0.54	0.58	0.51	0.07	0.013124	0.013997	0.027458	0.026594
SO2CHF2	0.75	0.86	0.67	0.19	0.015784	0.024906	0.03537	0.038053
SCHF2	0.33	0.37	0.32	0.05	0.007336	0.011496	0.012557	0.014134
S(O)(=NH)CF3	0.72	0.84	0.64	0.2	0.015176	0.024273	0.030329	0.033295
NHSO2CF3	0.44	0.39	0.45	-0.06	0.011066	0.0024	0.020161	0.015577
NHCN	0.21	0.06	0.28	-0.22	0.009912	-0.006566	0.017017	0.0091
1-(1H)-tetrazolyl	0.52	0.5	0.52	-0.02	0.013469	0.009255	0.029741	0.026618
5-(1H)-tetrazolyl	0.64	0.56	0.65	-0.09	0.0098	0.01318	0.024001	0.024371
5-hydroxy-1-tetrazolyl	0.39	0.33	0.41	-0.08	0.011258	0.007134	0.022216	0.019665
OCH2Cl	0.25	0.08	0.33	-0.25	0.007206	-0.000631	0.011696	0.007677
OCH2F	0.2	0.02	0.29	-0.27	0.005946	-0.008281	0.008296	0.001743
SCH2F	0.23	0.2	0.25	-0.05	0.005831	0.008716	0.016456	0.0171
NHCHO	0.19	0	0.28	-0.28	0.005202	-0.006638	0.006833	0.001569
CONH2	0.28	0.36	0.26	0.1	0.0049	0.010227	0.011406	0.01315
CSNH2	0.25	0.3	0.24	0.06	0.006003	0.010904	0.013807	0.015341
CH=NOH	0.22	0.1	0.28	-0.18	0.003292	0.005002	0.006534	0.007042
N(O)=NCONH2	0.59	0.63	0.56	0.07	0.011785	0.017049	0.025432	0.026656
CH2SO2Me	0.15	0.17	0.16	0.01	0.006326	0.007459	0.005499	0.006068
SiMeCl2	0.31	0.39	0.29	0.1	0.006201	0.012687	0.012957	0.015495
SiMeF2	0.29	0.23	0.32	-0.09	0.005409	0.012156	0.011554	0.014306
NHCONH2	-0.03	-0.24	0.09	-0.33	0.003079	-0.011625	0.000252	-0.005931
N(Me)NO2	0.49	0.61	0.43	0.18	0.00833	0.007235	0.017843	0.016426
NHCSNH2	0.22	0.16	0.26	-0.1	0.004866	-0.001586	0.005419	0.002264
SOMe	0.52	0.49	0.52	-0.03	0.009008	0.007455	0.017661	0.016202
S(OMe)	0.21	0.17	0.24	-0.07	0.00566	-0.003318	0.009037	0.00479
OS(=O)Me	0.44	0.45	0.43	0.02	0.007406	-0.00403	0.00987	0.004731
S(O)OMe	0.5	0.54	0.47	0.07	0.009795	0.012489	0.016548	0.017106
SO2Me	0.6	0.72	0.53	0.19	0.012162	0.01778	0.02613	0.027718
SSO2Me	0.43	0.54	0.38	0.16	0.009004	0.014279	0.02246	0.024222
OSO2Me	0.39	0.36	0.4	-0.04	0.009582	0.004117	0.021105	0.018022
SMe	0.15	0	0.23	-0.23	0.003513	-0.007927	0.00371	-0.001527
SSMe	0.22	0.13	0.27	-0.14	0.00561	-0.003652	0.008603	0.004224
SeMe	0.1	0	0.16	-0.16	0.003535	0.003065	0.007062	0.006769
CH2NH2	-0.03	-0.11	0.04	-0.15	-0.001556	-0.004944	-0.004664	-0.005794
NHSO2Me	0.2	0.03	0.28	-0.25	0.007835	-0.003343	0.016951	0.011692
N(COF)2	0.58	0.57	0.57	0	0.014585	0.015009	0.023981	0.023162
COCF3	0.63	0.8	0.54	0.26	0.010485	0.0242	0.025554	0.030466
SCOCF3	0.48	0.46	0.48	-0.02	0.011336	0.014591	0.021359	0.021945
OCOCF3	0.56	0.46	0.58	-0.12	0.01219	0.005649	0.022666	0.018852
N(CF3)C=O(F)	0.5	0.5	0.49	0.01	0.013186	0.014607	0.024772	0.0244
CF2CF3	0.47	0.52	0.44	0.08	0.0108	0.01545	0.022289	0.023446
OCF2CF3	0.48	0.28	0.55	-0.27	0.011366	0.006725	0.021853	0.01896
SO2CF2CF3	0.92	1.08	0.81	0.27	0.017415	0.02843	0.037786	0.041171
SCF2CF3	0.44	0.48	0.42	0.06	0.009883	0.015287	0.021068	0.02275
N(CF3)2	0.4	0.53	0.35	0.18	0.011559	0.014124	0.023257	0.02357
S(CF3)=NSO2CF3	1.18	1.28	1.07	0.21	0.022443	0.014114	0.046166	0.040599
SO(CF3)=NSO2CF3	1.23	1.4	1.09	0.31	0.022001	0.032266	0.048481	0.051139
N(SO2CF3)2	0.61	0.83	0.5	0.33	0.016917	0.022016	0.033062	0.034113
P(CF3)2	0.6	0.69	0.55	0.14	0.011253	0.020778	0.024588	0.027892
P(CN)2	0.82	0.9	0.75	0.15	0.014967	0.023106	0.032655	0.035026
OCF2CHFCl	0.35	0.28	0.38	-0.1	0.009685	0.004579	0.016868	0.014045
NHCOCF3	0.3	0.12	0.38	-0.26	0.009014	-0.000129	0.017321	0.01268
CH=NSO2CF3	0.76	1	0.63	0.37	0.012322	0.026274	0.032392	0.03701
OCF2CHF2	0.34	0.25	0.38	-0.13	0.009788	0.00466	0.017146	0.014299
SCF2CHF2	0.38	0.47	0.35	0.12	0.008335	0.013068	0.016699	0.018356
C2N8S2H	0.63	0.64	0.6	0.04	0.017802	0.020441	0.026288	0.024064
SC≡CH	0.26	0.19	0.3	-0.11	0.007404	0.009835	0.014241	0.01499
SCH=CHCl	0.31	0.24	0.34	-0.1	0.007066	0.009872	0.017035	0.017761
SeCH=CHCl	0.28	0.26	0.3	-0.04	0.006942	0.00979	0.016378	0.017197
CH2CF3	0.12	0.09	0.15	-0.06	0.005151	0.004755	0.009606	0.009143
CH2SOCF3	0.25	0.24	0.27	-0.03	0.007079	0.007647	0.01427	0.014204
CH2SO2CF3	0.29	0.31	0.29	0.02	0.009717	0.012056	0.017296	0.017806
CH2SCF3	0.12	0.15	0.13	0.02	0.005626	0.005479	0.013174	0.012565
CH2CN	0.16	0.18	0.17	0.01	0.007347	0.005692	0.014364	0.013059
NHCOCH2Cl	0.17	-0.03	0.27	-0.3	0.005547	-0.005332	0.007606	0.002731
N(Me)SO2CF3	0.46	0.44	0.46	-0.02	0.009607	0.004858	0.017412	0.014545
C(Me)(NO2)2	0.54	0.61	0.5	0.11	0.009224	0.017808	0.023352	0.025887
oxiranyl	0.05	0.03	0.09	-0.06	0.002552	-0.000559	0.003926	0.002419
OCH=CH2	0.21	-0.09	0.34	-0.43	0.005633	-0.011071	0.007322	-0.000467
SCOMe	0.39	0.44	0.37	0.07	0.006219	0.00785	0.007642	0.008208
2-thiacylopropyl	0.04	0.01	0.08	-0.07	0.002641	-0.000338	0.004664	0.00314
SCH=CH2	0.26	0.2	0.29	-0.09	0.005177	0.007323	0.011977	0.012708
SeCH=CH2	0.26	0.21	0.29	-0.08	0.005037	0.007237	0.011318	0.012147
1-aziridinyl	-0.07	-0.22	0.03	-0.25	0.001173	-0.005592	0.001134	-0.002017
2-aziridinyl	-0.06	-0.1	-0.01	-0.09	0.002982	-0.002284	0.005968	0.003215
N-methyl-3-oxaziridinyl	0.09	0.12	0.1	0.02	0.003048	0.005124	0.004996	0.005702
NHCOOMe	-0.02	-0.17	0.07	-0.24	0.004049	-0.010238	0.002717	-0.003426
CONHMe	0.35	0.36	0.35	0.01	0.003908	0.008266	0.00907	0.010669
CH=NOMe	0.37	0.3	0.4	-0.1	0.002946	0.004509	0.005583	0.00607
CH2CONH2	0.06	0.07	0.08	-0.01	0.002933	0.000291	0.013324	0.011955
NHCSMe	0.24	0.12	0.3	-0.18	0.005974	-0.003731	0.009115	0.00453
CSNHMe	0.3	0.34	0.29	0.05	0.006003	0.010906	0.013804	0.015338
CH=NNHCONHNH2	0.22	0.16	0.26	-0.1	0.000572	0.001593	-0.002133	-0.001496
CH(OH)Me	0.08	-0.07	0.16	-0.23	-0.000126	-0.004225	-0.003572	-0.005092
CH2OMe	0.08	0.01	0.13	-0.12	0.001114	0.001584	-0.000498	-0.000165
SO2Et	0.66	0.77	0.59	0.18	0.011831	0.017483	0.024982	0.026624
SEt	0.18	0.03	0.26	-0.23	0.003712	0.002462	0.007222	0.006692
P(Cl)NMe2	0.38	0.56	0.31	0.25	0.005101	0.006231	0.009399	0.00983
SiClMe2	0.16	0.21	0.16	0.05	0.003195	0.008239	0.006318	0.008358
SiFMe2	0.12	0.17	0.12	0.05	0.00189	0.005666	0.003602	0.005304
NHEt	-0.24	-0.61	-0.04	-0.57	-0.001055	-0.024777	-0.007506	-0.017612
N(Me)SO2Me	0.21	0.24	0.21	0.03	0.005981	-0.002032	0.007932	0.003963
SO2NMe2	0.51	0.65	0.44	0.21	0.011028	0.016858	0.022416	0.02432
N(SO2Me)2	0.47	0.49	0.45	0.04	0.011398	0.014706	0.020134	0.021243
SN(Me)2	0.12	0.09	0.15	-0.06	0.002603	-0.00928	0.00013	-0.004987
N=NNMe2	-0.05	-0.03	-0.02	-0.01	-0.001321	-0.006989	-0.006388	-0.008582
P(O)Me2	0.43	0.5	0.4	0.1	0.00539	0.00961	0.011871	0.013343
PO(OMe)2	0.42	0.53	0.37	0.16	0.006254	0.013949	0.012482	0.015753
PMe2	0.03	0.06	0.05	0.01	0.001303	0.003931	0.003192	0.00427
SiH(Me)2	0.01	0.04	0.03	0.01	0.00025	0.003216	3.5e-05	0.001507
CCCF3	0.41	0.51	0.37	0.14	0.009436	0.014933	0.022848	0.024351
CF=CFCF3	0.39	0.46	0.36	0.1	0.009121	0.014644	0.021664	0.023123
N=C(CF3)2	0.29	0.23	0.32	-0.09	0.010486	0.007752	0.021074	0.018991
CF2CF2CF3	0.44	0.48	0.42	0.06	0.01091	0.016183	0.022794	0.024151
CF(CF3)2	0.37	0.53	0.31	0.22	0.011535	0.014107	0.021969	0.022289
SO2CF2CF2CF3	0.92	1.09	0.81	0.28	0.017324	0.028442	0.037881	0.041298
SO2CF(CF3)2	0.92	1.1	0.8	0.3	0.018606	0.02954	0.039234	0.042529
SCF2CF2CF3	0.45	0.48	0.43	0.05	0.009901	0.015458	0.021507	0.023235
SCF(CF3)2	0.48	0.51	0.46	0.03	0.011091	0.015829	0.022309	0.02367
C(OH)(CF3)2	0.29	0.3	0.29	0.01	0.00991	0.0125	0.020056	0.020291
CH(SCF3)2	0.44	0.44	0.43	0.01	0.010744	0.011736	0.019672	0.019326
CH(CN)2	0.53	0.52	0.52	0	0.012618	0.011379	0.025982	0.024564
CH=CHCF3-c	0.16	0.17	0.18	-0.01	0.005583	0.011737	0.01227	0.014562
CH=CHCF3-t	0.24	0.27	0.24	0.03	0.006353	0.009812	0.016509	0.017186
CCMe	0.21	0.03	0.29	-0.26	0.001961	0.001869	0.002615	0.002654
N(Me)COCF3	0.41	0.39	0.41	-0.02	0.008278	0.00624	0.015357	0.013747
cyclopropyl	-0.07	-0.21	0.02	-0.23	-0.000149	-0.007359	-0.002639	-0.005689
C(Me)=CH2	0.09	0.05	0.13	-0.08	0.000494	-0.000926	0.00048	-0.000182
CH=CHMe	0.02	-0.09	0.09	-0.18	0.000127	-0.002673	-0.001084	-0.002297
CH2CH=CH2	-0.11	-0.14	-0.06	-0.08	0.000675	-0.003584	0.000155	-0.001509
C(Et)(NO2)2	0.56	0.64	0.51	0.13	0.011746	0.017449	0.024087	0.025439
OCH2CH=CH2	0.09	-0.25	0.25	-0.5	0.002923	-0.014696	0.002368	-0.005648
COEt	0.38	0.48	0.34	0.14	0.00427	0.013329	0.011624	0.014931
COOEt	0.37	0.45	0.34	0.11	0.003928	0.012614	0.009007	0.012474
CH2OCOMe	0.04	0.05	0.07	-0.02	0.003094	0.004083	0.006628	0.006872
CH2CH2COOH	-0.03	-0.07	0.02	-0.09	0.001885	-0.00175	0.004532	0.002769
SCH2CH=CH2	0.19	0.12	0.23	-0.11	0.004089	-0.006989	0.005137	-1.8e-05
SeCH2CH=CH2	0.21	0.12	0.26	-0.14	0.003789	0.004184	0.00817	0.008191
CH2NHCOMe	0.05	-0.05	0.12	-0.17	0.000818	-0.00127	0.001645	0.000899
NHCOOEt	0.11	-0.15	0.23	-0.38	0.003854	-0.010494	0.002208	-0.003931
C(NO2)Me2	0.18	0.2	0.19	0.01	0.007293	0.006845	0.012881	0.012121
isopropyl	-0.04	-0.15	0.04	-0.19	-0.000519	-0.005223	-0.002637	-0.004491
Pr	-0.06	-0.13	0.01	-0.14	-0.000698	-0.005289	-0.002693	-0.00453
NHCONHEt	0.04	-0.26	0.19	-0.45	0.002212	-0.013302	-0.002166	-0.008579
NHCSNHEt	0.3	0.07	0.4	-0.33	0.003597	-0.003924	0.001786	-0.001661
OCHMe2	0.1	-0.45	0.34	-0.79	0.001647	-0.017046	-0.000825	-0.009086
OPr	0.1	-0.25	0.26	-0.51	0.001835	-0.01634	-0.000462	-0.008548
CH2CH(OH)Me	-0.12	-0.17	-0.06	-0.11	-0.002471	-0.005541	-0.007467	-0.00819
C(OOH)Me2	0.06	-0.14	0.17	-0.31	0.001139	0.000149	0.000408	2.3e-05
SCHMe2	0.23	0.07	0.3	-0.23	0.003566	0.002577	0.006899	0.006524
CH2NMe2	0	0.01	0.03	-0.02	-0.000376	-0.003785	-0.002508	-0.003571
GeMe3	0	0	0.03	-0.03	-0.000519	0.000408	-0.002004	-0.001381
Si(Me)2OMe	0.04	-0.02	0.09	-0.11	0.00055	0.005434	-0.001473	0.000939
OSiMe3	0.13	-0.27	0.31	-0.58	0.002147	-0.011524	0.001347	-0.0045
SiMe(OMe)2	0.04	0.1	0.05	0.05	-0.0003	0.004908	-0.004505	-0.001586
Si(OMe)3	0.09	0.13	0.1	0.03	0.000776	0.006849	0.002078	0.005148
SiMe3	-0.04	-0.07	0.01	-0.08	-0.000634	0.001946	-0.001882	-0.000572
cyclo-C4F7	0.48	0.53	0.45	0.08	0.010476	0.012557	0.020792	0.0208
COCF2CF2CF3	0.63	0.79	0.55	0.24	0.010502	0.024804	0.026028	0.031145
C(CF3)3	0.55	0.55	0.53	0.02	0.010736	0.015531	0.021769	0.022903
(CF2)3CF3	0.47	0.52	0.44	0.08	0.010888	0.016382	0.023164	0.02459
SO2C(CF3)3	0.96	1.13	0.84	0.29	0.017533	0.030271	0.038543	0.042496
SC(CF3)3	0.51	0.58	0.47	0.11	0.009652	0.017371	0.022115	0.024647
C(SCF3)3	0.51	0.53	0.49	0.04	0.012601	0.016131	0.025947	0.026636
SeC(CF3)3	0.49	0.54	0.46	0.08	0.00994	0.017282	0.021993	0.024432
C(CN)3	0.97	0.96	0.92	0.04	0.016193	0.021518	0.041	0.041479
cyclo-1-(OH)C4F6	0.36	0.37	0.36	0.01	0.00743	0.009368	0.012904	0.013242
CH=C(CN)2	0.66	0.84	0.57	0.27	0.012119	0.024434	0.031461	0.03554
2-(5-bromofuryl)	0.15	0	0.23	-0.23	0.003796	0.001276	0.006701	0.005323
1-pyrroline-2,5-dione	0.305	0.244	0.317	-0.073	0.004323	-0.002249	0.003284	0.000552
3-chloro-1-pyrrolidine-2,5-dione	0.387	0.359	0.387	-0.028	0.008554	0.00719	0.011871	0.010956
3-pyridazinyl	0.28	0.48	0.21	0.27	0.003506	0.005762	0.006429	0.00723
C(Me)(CN)2	0.6	0.57	0.59	-0.02	0.015059	0.025285	0.024212	0.022738
2-furyl	0.06	0.02	0.1	-0.08	0.002196	-0.00086	0.002439	0.001035
2-thienyl	0.09	0.05	0.13	-0.08	0.003204	0.000218	0.004535	0.003193
3-thienyl	0.03	-0.02	0.08	-0.1	0.001677	-0.001295	0.00263	0.001309
2-selenienyl	0.06	0.04	0.1	-0.06	0.003317	0.000402	0.004923	0.003595
1-pyrryl	0.47	0.37	0.5	-0.13	0.006005	-0.00647	0.009563	0.003419
1-pyrrolidine-2,5-dione	0.298	0.257	0.303	-0.046	0.006771	0.00493	0.006933	0.006048
cyclobutyl	-0.05	-0.14	0.02	-0.16	-0.00075	-0.005697	-0.002909	-0.004894
COCHMe2	0.38	0.47	0.35	0.12	0.003766	0.012589	0.01022	0.013507
NHCOCH(Me)2	0.11	-0.1	0.21	-0.31	0.003724	-0.008677	0.002897	-0.002412
CMe3	-0.1	-0.2	-0.02	-0.18	-0.001001	-0.00512	-0.003289	-0.005015
CH(Me)Et	-0.08	-0.12	-0.02	-0.1	-0.000579	-0.005391	-0.002916	-0.004782
CH2CH(Me)2	-0.07	-0.12	-0.01	-0.11	-0.000235	-0.005073	-0.002025	-0.003824
n-Bu	-0.08	-0.16	-0.01	-0.15	-0.000694	-0.005388	-0.0028	-0.004679
On-Bu	0.1	-0.32	0.29	-0.61	0.001804	-0.016398	-0.000578	-0.008673
CH2C(OH)Me2	-0.16	-0.17	-0.11	-0.06	-0.000364	-0.003792	-0.004068	-0.005032
C(OMe)3	-0.03	-0.04	0.01	-0.05	0.00159	0.001604	0.002715	0.003167
AsEt2	0.22	0	0.32	-0.32	0.000914	0.001812	0.001891	0.002302
As(O)Et2	0.57	0.44	0.6	-0.16	0.006039	0.008745	0.012363	0.013293
As(S)Et2	0.52	0.44	0.54	-0.1	0.007175	0.010077	0.015119	0.015916
NH(CH2)3CH3	-0.34	-0.51	-0.21	-0.3	-0.001172	-0.02503	-0.007946	-0.018086
NEt2	-0.23	-0.6	-0.1	-0.5	-0.001817	-0.02309	-0.008013	-0.017165
PO(Et)2	0.37	0.47	0.33	0.14	0.005209	0.008798	0.010902	0.012179
N=NPO(OEt)2	0.16	0.74	-0.05	0.79	0.007986	0.01666	0.017724	0.020663
P(Et)2	0.1	0.13	0.11	0.02	0.001047	0.003079	0.002563	0.003436
P(S)Et2	0.39	0.46	0.36	0.1	0.006533	0.010563	0.013831	0.015157
CH2OSi(Me)3	-0.04	-0.05	0	-0.05	-0.000975	-0.006078	-0.005048	-0.007008
CH2Si(Me)3	-0.16	-0.21	-0.09	-0.12	-0.000472	-0.009079	-0.00341	-0.006658
PO(NMe2)2	0.3	0.4	0.27	0.13	0.003881	0.009276	0.007697	0.010107
P(NMe2)2	0.18	0.25	0.17	0.08	0.000427	0.003299	0.000374	0.001743
C(CN)=C(CN)2	0.77	0.98	0.65	0.33	0.016845	0.027366	0.038813	0.041912
2-(5-cyanofuryl)	0.25	0.1	0.32	-0.22	0.006849	0.00777	0.016368	0.015994
3-pyridyl	0.23	0.25	0.24	0.01	0.00353	0.002062	0.007854	0.006924
4-pyridyl	0.27	0.44	0.21	0.23	0.004259	0.004189	0.010637	0.010162
2-(4,6-dimethyl-s-triazinyl)	0.25	0.39	0.21	0.18	0.002067	0.01022	0.004309	0.007773
1-cyclopentenyl	-0.06	-0.05	-0.03	-0.02	-0.000336	-0.00265	-0.001488	-0.00246
cyclopentyl	-0.05	-0.14	0.02	-0.16	-0.00107	-0.005715	-0.003707	-0.005545
COCMe3	0.27	0.32	0.26	0.06	0.003439	0.011845	0.009514	0.012637
NHCO2n-Bu	0.06	-0.05	0.13	-0.18	0.00335	-0.009939	0.0019	-0.003776
CEt(Me)2	-0.06	-0.18	0.03	-0.21	-0.001187	-0.005372	-0.003829	-0.005549
CH2C(Me)3	-0.05	-0.17	0.03	-0.14	-0.00078	-0.004464	-0.002077	-0.003416
(CH2)4CH3	-0.08	-0.15	-0.01	-0.14	-0.000697	-0.005398	-0.002807	-0.004688
O(CH2)4CH3	0.1	-0.34	0.29	-0.63	0.002369	-0.006651	0.002941	-0.001211
CH2PO(OEt)2	0.12	0.06	0.17	-0.11	0.006415	0.001913	0.00557	0.00457
CH2CH2SiMe3	-0.16	-0.17	-0.11	-0.06	-0.000815	-0.005991	-0.003223	-0.005271
Si(Me)2OSiMe3	0	-0.01	0.04	-0.05	-0.00091	0.002238	-0.003429	-0.001717
C6Cl5	0.25	0.24	0.27	-0.03	0.007081	0.007759	0.013409	0.013215
C6F5	0.26	0.27	0.27	0	0.007365	0.009863	0.015674	0.016171
P(O)(C3F7)2	0.95	1.1	0.84	0.26	0.017241	0.031975	0.034204	0.03775
OP(O)(C3F7)2	0.66	0.56	0.67	-0.11	0.015102	0.006766	0.026931	0.022435
NHP(O)(C3F7)2	0.28	0.18	0.33	-0.15	0.011832	0.000601	0.01961	0.014184
CH2Mn(CO)5	-0.14	-0.44	0.02	-0.46	0.001408	-0.0085	6.3e-05	-0.004193
C6H2-2,4,6-(NO2)3	0.26	0.3	0.26	0.04	0.016741	0.019326	0.02691	0.026774
C6H4-3-Br	0.09	0.08	0.12	-0.04	0.003404	0.002038	0.007359	0.006499
C6H4-4-Br	0.15	0.12	0.18	-0.06	0.003023	0.00133	0.007345	0.006322
C6H4-3-Cl	0.15	0.1	0.19	-0.09	0.003342	0.001964	0.007257	0.006396
C6H4-4-Cl	0.15	0.12	0.18	-0.06	0.002906	0.001118	0.007069	0.006018
C6H4-3-F	0.15	0.1	0.19	-0.09	0.003096	0.00168	0.006661	0.005808
C6H4-4-F	0.12	0.06	0.17	-0.11	0.002411	0.000129	0.00573	0.004529
OC6H4-4-F	-0.08	-0.1	-0.03	-0.07	0.00624	-0.002196	0.010608	0.006408
C6H4-3-NO2	0.21	0.2	0.23	-0.03	0.005678	0.005235	0.01414	0.013325
C6H4-4-NO2	0.25	0.26	0.26	0	0.005891	0.00642	0.016816	0.016274
SC6H4-4-NO2	0.32	0.24	0.36	-0.12	0.007518	0.00964	0.01855	0.018692
SOC6H4-4-NO2	0.58	0.6	0.55	0.05	0.013128	0.013592	0.028248	0.027068
2-benzotriazolyl	0.49	0.51	0.47	0.04	0.01055	0.011135	0.017343	0.017032
N(O)=NSO2Ph	0.69	0.79	0.62	0.17	0.014339	0.021388	0.031698	0.03343
N=NPh	0.32	0.39	0.3	0.09	0.003727	0.008233	0.007613	0.009137
OPh	0.25	-0.03	0.37	-0.4	0.005304	-0.003385	0.006929	0.00285
SOPh	0.5	0.44	0.51	-0.07	0.009622	0.008244	0.015666	0.014402
2-(5-acetylfuryl)	0.24	0.08	0.31	-0.23	0.00519	0.005104	0.013103	0.012389
2-(6-methylpyronyl)	0.38	0.43	0.36	0.07	0.006459	0.00963	0.015848	0.016493
SO2Ph	0.62	0.68	0.5	0.1	0.012056	0.016911	0.022431	0.023879
OSO2Ph	0.36	0.33	0.37	-0.04	0.00891	0.004283	0.010384	0.008158
SPh	0.23	0.07	0.3	-0.23	0.004461	0.005401	0.007212	0.00754
NHPh	-0.02	-0.56	0.22	-0.78	0.001883	-0.015707	0.000753	-0.007002
NHSO2Ph	0.33	0.03	0.43	-0.4	0.006984	0.001378	0.014984	0.012654
SO2NHPh	0.56	0.65	0.51	0.14	0.011983	0.016587	0.024322	0.025775
2-(5-ethylfuryl)	0.09	-0.13	0.2	-0.33	0.00127	-0.002713	0.000113	-0.001598
1-(2,5-dimethylpyrryl)	0.49	0.38	0.52	-0.14	0.005628	0.002301	0.011843	0.010077
1-cyclohexenyl	-0.1	-0.08	-0.07	-0.01	-0.000654	-0.003772	-0.002462	-0.003673
cyclohexyl	-0.05	-0.15	0.03	-0.18	-0.000772	-0.005384	-0.003341	-0.005129
N(n-Pr)2	-0.26	-0.6	-0.14	-0.46	-0.002157	-0.027264	-0.009644	-0.020353
(CH2)4NMe2	-0.08	-0.16	-0.01	-0.15	-0.001073	-0.006086	-0.003177	-0.005276
PO(i-Pr)2	0.37	0.41	0.36	0.05	0.004183	0.008724	0.00891	0.010754
P(i-Pr)2	0.02	0.06	0.04	0.02	0.001918	-0.001966	0.00153	1.2e-05
P(O)(OPr)2	0.38	0.5	0.33	0.17	0.005897	0.012671	0.008606	0.011637
Ge(Et)3	0	0	0.03	-0.03	-0.00063	0.000101	-0.002407	-0.001792
Si(OEt)3	0.02	0.08	0.03	0.05	0.000306	0.005965	-0.004632	-0.001495
P(=NSO2CF3)(C3F7)2	1.24	1.37	1.11	0.26	0.020014	0.032775	0.044977	0.048835
Si(NMe2)3	-0.04	-0.04	0	-0.04	-0.001341	0.002375	-0.003353	-0.001247
2-benzoxazolyl	0.3	0.33	0.3	0.04	0.006893	0.009141	0.011086	0.011799
2-benzthiazolyl	0.27	0.29	0.27	0.02	0.005887	0.006939	0.009422	0.009664
COPh	0.34	0.43	0.31	0.12	0.003255	0.013627	0.008992	0.012839
OCOPh	0.21	0.13	0.26	-0.13	0.006756	-0.00122	0.007499	0.003748
COOPh	0.37	0.44	0.34	0.1	0.005227	0.014843	0.012519	0.016228
CH=NPh	0.35	0.42	0.33	0.09	0.002866	0.00793	0.006312	0.008196
NHCOPh	0.02	-0.19	0.13	-0.32	0.003973	-0.008349	0.003007	-0.002281
CONHPh	0.23	0.41	0.17	0.24	0.006263	0.010801	0.014281	0.015578
C6H4-4-Me	0.06	-0.03	0.12	-0.15	0.000781	-0.001992	7.5e-05	-0.001055
CH2Ph	-0.08	-0.09	-0.04	-0.05	0.00042	-0.003723	-0.000907	-0.002399
N=NPh-5-Me-2-OH	0.27	0.31	0.26	0.05	0.004962	0.009009	0.011619	0.012643
C6H4-4-OMe	0.05	-0.08	0.13	-0.21	0.000466	-0.002999	-0.000709	-0.002106
CH(OH)Ph	0	-0.03	0.05	-0.08	0.002552	0.001538	0.005906	0.005317
CH2OPh	0.06	0.07	0.08	-0.01	0.001923	-0.001453	0.001946	0.000503
CH2SO2Ph	0.15	0.16	0.17	-0.01	0.006202	0.007455	0.004382	0.005084
C(Et)3	-0.07	-0.2	0.02	-0.22	-0.001509	-0.006052	-0.004492	-0.006358
(CH2)6CH3	-0.07	-0.16	0	-0.16	-0.00072	-0.005413	-0.002855	-0.004736
SiMe(OSi(Me)3)2	-0.02	-0.01	0.01	-0.02	0.003607	0.006499	0.002428	0.004347
CF2CF2C6H4-4-F	0.34	0.39	0.32	0.07	0.008129	0.012387	0.014314	0.015694
C≡CPh	0.14	0.16	0.15	0.01	0.003426	0.004414	0.006417	0.006715
CH=NCOPh	0.39	0.51	0.34	0.17	0.006343	0.01605	0.016101	0.0196
CH=CHPh	0.03	-0.07	0.1	-0.17	0.001385	-0.000105	0.002362	0.001575
CH2Fe(CO)2(pi-C5H5)	-0.26	-0.49	-0.11	-0.38	0.016226	0.00355	0.021472	0.017962
CH=NNHCOPh	0.39	0.51	0.34	0.17	0.003685	0.005779	0.00615	0.006913
NHCOC6H4-4-OMe	0.09	-0.06	0.17	-0.23	0.003274	-0.009542	0.000584	-0.004793
SCH=NSO2C6H4-4-Me	0.65	0.7	0.61	0.09	0.011263	0.011841	0.02386	0.023226
C6H4-4-Et	0.07	-0.02	0.13	-0.15	0.000825	-0.001899	0.000191	-0.000923
CH2CH2Ph	-0.07	-0.12	-0.01	-0.11	0.000163	-0.004111	-0.000269	-0.002119
SiPhMe2	0.04	0.07	0.06	0.01	0.000369	0.003568	0.000519	0.002198
S(Me)=NSO2C6H4-4-Me	0.65	0.7	0.61	0.09	0.014447	0.014206	0.023155	0.022266
PO(t-Bu)2	0.31	0.41	0.28	0.13	0.004735	0.008608	0.008936	0.010681
PO(n-Bu)2	0.35	0.49	0.3	0.19	0.005008	0.008452	0.010074	0.011347
PO(On-Bu)2	0.41	0.57	0.35	0.22	0.005837	0.012574	0.008371	0.011398
P(t-Bu)2	0.01	0.15	-0.01	0.16	0.001049	0.004039	0.002517	0.004015
C6H5Cr(CO)3	0.29	0.14	0.36	-0.22	0.007159	0.006557	0.012452	0.011618
2-benzo-4-thiopyronyl	0.34	0.35	0.34	0.01	0.007473	0.012024	0.017873	0.019039
2-benzothiopyronyl	0.48	0.45	0.48	-0.03	0.007793	0.009635	0.016209	0.016449
2-(benzo-1,4-pyronyl)	0.41	0.4	0.41	-0.01	0.006839	0.010878	0.016219	0.017241
C6H4-4-CHMe2	0.08	0.01	0.13	-0.12	0.000827	-0.001877	0.00022	-0.000896
Si(OSiMe3)3	-0.09	-0.01	-0.08	0.07	1.2e-05	0.004237	-0.002724	-0.000377
ferrocenyl	-0.15	-0.18	-0.09	-0.09	0.000649	-0.003913	0.000558	-0.001279
C6H4-4-CMe3	0.07	0.01	0.12	-0.11	0.000822	-0.001853	0.000197	-0.000903
1-dibenzarsenyl	0.19	0.13	0.23	-0.1	0.002356	0.004226	0.002504	0.003551
1-dibenzoarsoxyl	0.17	0.09	0.22	-0.13	0.006193	0.009779	0.010643	0.012199
1-dibenzoarsazinyl	0.14	0.09	0.18	-0.09	0.003137	0.00485	0.002143	0.003098
AsPh2	0.03	0.09	0.04	0.05	0.002794	0.002252	0.003288	0.003584
AsOPh2	0.54	0.64	0.49	0.15	0.006482	0.010052	0.011379	0.012863
PPh2BCl3	0.67	0.72	0.62	0.1	0.011112	0.016537	0.02057	0.02279
NPh2	0	-0.22	0.12	-0.34	0.001789	-0.009809	0.002032	-0.002827
POPh2	0.38	0.53	0.32	0.21	0.005626	0.010262	0.009617	0.011556
PPh2	0.11	0.19	0.1	0.09	0.002843	0.002788	0.003634	0.004147
PSPh2	0.29	0.47	0.23	0.24	0.007159	0.01119	0.012534	0.014419
P(NPr2)-C6H4-3-F	0.2	0.24	0.2	0.04	0.002003	-7.3e-05	0.00198	0.00111
pyron-comp1	0.37	0.38	0.37	0.01	0.007149	0.01074	0.017114	0.017869
pyron-comp2	0.38	0.38	0.38	0	0.006738	0.010317	0.01574	0.016575
imidazole-comp1	0.17	0.21	0.17	0.04	0.003092	0.004997	0.005112	0.006133
CHPh2	-0.03	-0.05	0.01	-0.06	0.001353	-0.002755	-7e-06	-0.001247
As-comp1	0.12	0.07	0.16	-0.09	0.00069	-0.003511	-0.00223	-0.003269
POPh(Ph-4-Me)	0.13	0.3	0.09	0.21	0.005166	0.00966	0.008218	0.010173
CH2POPh2	0.14	0.01	0.21	-0.2	0.002619	-0.001816	-0.001815	-0.002554
PS(Ph)(Ph-4-Me)	0.09	0.3	0.03	0.27	0.006845	0.01051	0.011181	0.013008
Si(Me)Ph2	0.1	0.13	0.11	0.02	0.000549	0.003847	-0.000231	0.001764
COOCHPh2	0.36	0.56	0.28	0.28	0.004834	0.013738	0.010611	0.014092
PO(Ph-4-Me)2	0.17	0.3	0.14	0.16	0.004757	0.009047	0.006993	0.008932
PS(Ph-4-Me)2	0.2	0.23	0.2	0.03	0.006421	0.010162	0.010077	0.011977
GePh3	0.05	0.08	0.07	0.01	0.00138	0.003138	0.000199	0.001525
N=PPh3	-0.33	-0.77	-0.1	-0.67	-0.007575	-0.027095	-0.021966	-0.029155
SiPh3	-0.03	0.1	-0.04	0.14	0.000963	0.00457	-0.000258	0.001896
CPh3	-0.01	0.02	0.01	0.01	0.001141	-0.001984	-0.000871	-0.001707
1-(1,2(BH)10-C2H)	0.49	0.43	0.5	-0.07	0.01101	0.010567	0.023597	0.022435
1-(1,7(BH)10-C2H)	0.25	0.33	0.23	0.1	0.007492	0.006968	0.013162	0.012631
2-(1,7(BH)10-C2H)	0.14	0.15	0.16	-0.01	0.003097	0.006642	0.009444	0.010686
4-(1,7(BH)10-C2H)	-0.02	0.02	0	0.02	0.000528	0.003165	0.000865	0.002251
3-(1,2(BH)10-C2H)	0.2	0.19	0.22	-0.03	0.003495	0.006822	0.011458	0.0125
1-(1,2(BH)10-C2Me)	0.5	0.65	0.43	0.22	0.009542	0.012118	0.022714	0.023218
CH2-1-(1,2(BH)10-C2H)	0.12	0.12	0.14	-0.02	0.008087	0.006297	0.01265	0.011727
CH2-1-(1,7(BH)10-C2H)	0	0.01	0.03	-0.02	0.006252	0.003549	0.006245	0.005303
2-(methylcarbonyl)carboran-1-yl	0.4	0.63	0.31	0.32	0.009564	0.013343	0.015973	0.017136
2-((carbonyloxy)methyl)carboran-1-yl	0.7	0.74	0.66	0.08	0.010054	0.012935	0.027029	0.028119
CH2-1-(1,2(BH)10-C2Me)	0.1	0.11	0.12	-0.01	0.007782	0.00573	0.011336	0.010377
1-adamantyl	-0.12	-0.13	-0.07	-0.06	-0.001387	-0.005396	-0.004883	-0.00645

## Sheet: MN15_6-311++g(3df,2pd)_SMD
Functional Groups	σ_m	σ_p	F	R	ΔV_{m}	ΔV_{p}
Refernece Values for H	0	0	0	0	-14.7655	-14.7656
H	0	0	0	0	0	0
Me	-0.07	-0.17	0.01	-0.18	-0.003927	-0.006665
CH=CH2	0.06	-0.04	0.13	-0.17	0.002766	0.002404
Ph	0.06	-0.01	0.12	-0.13	0.002611	0.001792
OAc	0.39	0.31	0.42	-0.11	0.010308	0.007133
NHCOCH3	0.21	0	0.31	-0.31	0.004705	-0.000304
OMe	0.12	-0.27	0.29	-0.56	0.000401	-0.008386
OH	0.12	-0.37	0.33	-0.7	0.003552	-0.006028
NH2	-0.16	-0.66	0.08	-0.74	-0.00902	-0.02083
F	0.34	0.06	0.45	-0.39	0.018166	0.011585
Cl	0.37	0.23	0.42	-0.19	0.020291	0.017546
Br	0.39	0.23	0.45	-0.22	0.020978	0.018669
CHO	0.35	0.42	0.33	0.09	0.026399	0.032319
COMe	0.38	0.5	0.33	0.17	0.0192	0.024274
COOMe	0.37	0.45	0.34	0.11	0.015958	0.021577
COOH	0.37	0.45	0.34	0.11	0.019109	0.024995
COCl	0.51	0.61	0.46	0.15	0.03532	0.042701
CF3	0.43	0.54	0.38	0.16	0.026709	0.028675
CN	0.56	0.66	0.51	0.15	0.037986	0.041725
NO2	0.71	0.78	0.65	0.13	0.044654	0.050008
NHMe	-0.21	-0.7	0.03	-0.73	-0.012022	-0.024355
NMe2	-0.16	-0.6	0	-0.6	-0.013604	-0.025257
CHF2	0.29	0.32	0.29	0.03	0.018878	0.020248
COF	0.55	0.7	0.48	0.22	0.034656	0.041518
SH	0.25	0.15	0.3	-0.15	0.010375	0.005441
NHNH2	-0.02	-0.55	0.22	-0.77	-0.002333	-0.014179
NO	0.62	0.91	0.49	0.42	0.036986	0.045644
CH2F	0.12	0.11	0.15	-0.04	0.009754	0.010878
CH2Cl	0.11	0.12	0.13	-0.01	0.01044	0.010198
CH2Br	0.12	0.14	0.14	0	0.010753	0.010239
CH2OH	0	0	0.03	-0.03	-0.005386	-0.00753
Et	-0.07	-0.15	0	-0.15	-0.003868	-0.006436
OEt	0.1	-0.24	0.26	-0.5	-0.000704	-0.009412
CCH	0.21	0.23	0.22	0.01	0.01257	0.014561
BF2	0.32	0.48	0.26	0.22	0.018088	0.024331
GeBr3	0.66	0.73	0.61	0.12	0.032479	0.03574
SiBr3	0.48	0.57	0.44	0.13	0.026697	0.031248
SO2Cl	1.2	1.11	1.16	-0.05	0.050711	0.056452
SCl	0.44	0.48	0.42	0.06	0.027934	0.033321
POCl2	0.78	0.9	0.7	0.2	0.040579	0.046115
PCl2	0.54	0.61	0.5	0.11	0.029075	0.033442
PSCl2	0.7	0.8	0.63	0.17	0.037784	0.041464
GeCl3	0.71	0.79	0.65	0.14	0.034383	0.037395
SiCl3	0.48	0.56	0.44	0.12	0.026292	0.030822
SOF	0.74	0.83	0.67	0.16	0.039432	0.043614
SO2F	0.8	0.91	0.72	0.19	0.050666	0.056708
POF2	0.81	0.89	0.74	0.15	0.040911	0.04517
PF2	0.49	0.59	0.44	0.15	0.026217	0.031083
GeF3	0.85	0.97	0.76	0.21	0.040817	0.044231
SF3	0.7	0.8	0.63	0.17	0.038168	0.04206
SiF3	0.54	0.69	0.47	0.22	0.027622	0.032469
PF4	0.63	0.8	0.54	0.26	0.022514	0.024816
SF5	0.61	0.68	0.56	0.12	0.035024	0.037284
ONO2	0.55	0.7	0.48	0.22	0.031059	0.026806
N3	0.37	0.08	0.48	-0.4	0.019371	0.01676
B(OH)2	-0.01	0.12	-0.03	0.15	0.003599	0.007263
NHOH	-0.04	-0.34	0.11	-0.45	-0.002446	-0.011525
SO2NH2	0.53	0.6	0.49	0.11	0.029036	0.033061
PH2	0.06	0.05	0.09	-0.04	0.007001	0.005021
GeH3	0	0.01	0.03	-0.02	0.00525	0.006158
SiH3	0.05	0.1	0.06	0.04	0.008596	0.010965
CBr3	0.28	0.29	0.28	0.01	0.02421	0.025944
CClF2	0.42	0.46	0.4	0.06	0.026629	0.028196
5-chloro-1-tetrazolyl	0.6	0.61	0.58	0.03	0.041915	0.041258
N=CCl2	0.21	0.13	0.26	-0.13	0.014907	0.011551
CCl3	0.4	0.46	0.38	0.09	0.024687	0.026326
OCCl3	0.43	0.35	0.46	-0.11	0.024694	0.022917
N=NCF3	0.56	0.68	0.5	0.18	0.034644	0.040871
OCF3	0.38	0.35	0.39	-0.04	0.025407	0.022985
SOCF3	0.63	0.69	0.58	0.11	0.039308	0.042343
SeOCF3	0.81	0.83	0.76	0.07	0.035571	0.037071
SO2CF3	0.83	0.96	0.74	0.22	0.052368	0.059454
SeO2CF3	1.08	1.21	0.97	0.24	0.058415	0.062182
OSO2CF3	0.56	0.53	0.56	-0.03	0.035194	0.029948
SCF3	0.4	0.5	0.36	0.14	0.026638	0.029876
SeCF3	0.44	0.45	0.43	0.02	0.023356	0.02564
NC	0.48	0.49	0.47	0.02	0.033181	0.032911
NCO	0.27	0.19	0.31	-0.12	0.024606	0.021419
OCN	0.67	0.54	0.69	-0.15	0.039175	0.035112
SO2CN	1.1	1.26	0.97	0.29	0.059163	0.065825
NCS	0.48	0.38	0.51	-0.13	0.031033	0.029034
SCN	0.51	0.52	0.49	0.03	0.036027	0.037944
SeCN	0.61	0.66	0.57	0.09	0.029443	0.027302
N=NCN	0.71	1.03	0.56	0.47	0.046804	0.055283
N(O)=NCN	0.78	0.89	0.7	0.19	0.056244	0.061361
C(NO2)3	0.72	0.82	0.65	0.17	0.052668	0.055879
CHBr2	0.31	0.32	0.31	0.01	0.019639	0.020118
CHCl2	0.31	0.32	0.31	0.01	0.019539	0.020067
OCHCl2	0.38	0.26	0.43	-0.17	0.016098	0.014112
OCHF2	0.31	0.18	0.37	-0.19	0.013761	0.011494
SOCHF2	0.54	0.58	0.51	0.07	0.037544	0.038353
SO2CHF2	0.75	0.86	0.67	0.19	0.050119	0.056103
SCHF2	0.33	0.37	0.32	0.05	0.015963	0.019083
S(O)(=NH)CF3	0.72	0.84	0.64	0.2	0.041396	0.048068
NHSO2CF3	0.44	0.39	0.45	-0.06	0.026455	0.020073
NHCN	0.21	0.06	0.28	-0.22	0.021434	0.012651
1-(1H)-tetrazolyl	0.52	0.5	0.52	-0.02	0.039633	0.036791
5-(1H)-tetrazolyl	0.64	0.56	0.65	-0.09	0.032603	0.03356
5-hydroxy-1-tetrazolyl	0.39	0.33	0.41	-0.08	0.030853	0.029628
OCH2Cl	0.25	0.08	0.33	-0.25	0.013272	0.008488
OCH2F	0.2	0.02	0.29	-0.27	0.012052	0.007567
SCH2F	0.23	0.2	0.25	-0.05	0.012377	0.008859
NHCHO	0.19	0	0.28	-0.28	0.009085	0.004036
CONH2	0.28	0.36	0.26	0.1	0.016741	0.019808
CSNH2	0.25	0.3	0.24	0.06	0.020254	0.022826
CH=NOH	0.22	0.1	0.28	-0.18	0.009976	0.011417
N(O)=NCONH2	0.59	0.63	0.56	0.07	0.035814	0.039537
CH2SO2Me	0.15	0.17	0.16	0.01	0.002787	0.003389
SiMeCl2	0.31	0.39	0.29	0.1	0.01671	0.020212
SiMeF2	0.29	0.23	0.32	-0.09	0.014103	0.017745
NHCONH2	-0.03	-0.24	0.09	-0.33	-0.002282	-0.008546
N(Me)NO2	0.49	0.61	0.43	0.18	0.026499	0.025442
NHCSNH2	0.22	0.16	0.26	-0.1	0.004602	0.001748
SOMe	0.52	0.49	0.52	-0.03	0.024942	0.024995
S(OMe)	0.21	0.17	0.24	-0.07	0.010311	0.005277
OS(=O)Me	0.44	0.45	0.43	0.02	0.014675	0.012386
S(O)OMe	0.5	0.54	0.47	0.07	0.022348	0.025314
SO2Me	0.6	0.72	0.53	0.19	0.035937	0.040174
SSO2Me	0.43	0.54	0.38	0.16	0.032273	0.035617
OSO2Me	0.39	0.36	0.4	-0.04	0.029529	0.026788
SMe	0.15	0	0.23	-0.23	0.004216	-0.001064
SSMe	0.22	0.13	0.27	-0.14	0.016556	0.018278
SeMe	0.1	0	0.16	-0.16	0.004559	1.8e-05
CH2NH2	-0.03	-0.11	0.04	-0.15	-0.004461	-0.005294
NHSO2Me	0.2	0.03	0.28	-0.25	0.008645	0.007201
N(COF)2	0.58	0.57	0.57	0	0.027737	0.027086
COCF3	0.63	0.8	0.54	0.26	0.036481	0.044128
SCOCF3	0.48	0.46	0.48	-0.02	0.028118	0.030128
OCOCF3	0.56	0.46	0.58	-0.12	0.027984	0.024261
N(CF3)C=O(F)	0.5	0.5	0.49	0.01	0.03052	0.030526
CF2CF3	0.47	0.52	0.44	0.08	0.02828	0.03038
OCF2CF3	0.48	0.28	0.55	-0.27	0.02624	0.023671
SO2CF2CF3	0.92	1.08	0.81	0.27	0.052447	0.05988
SCF2CF3	0.44	0.48	0.42	0.06	0.027653	0.030848
N(CF3)2	0.4	0.53	0.35	0.18	0.020495	0.015629
S(CF3)=NSO2CF3	1.18	1.28	1.07	0.21	0.063391	0.057905
SO(CF3)=NSO2CF3	1.23	1.4	1.09	0.31	0.071684	0.07835
N(SO2CF3)2	0.61	0.83	0.5	0.33	0.044503	0.046489
P(CF3)2	0.6	0.69	0.55	0.14	0.032999	0.037751
P(CN)2	0.82	0.9	0.75	0.15	0.043875	0.047165
OCF2CHFCl	0.35	0.28	0.38	-0.1	0.019835	0.017616
NHCOCF3	0.3	0.12	0.38	-0.26	0.021386	0.016582
CH=NSO2CF3	0.76	1	0.63	0.37	0.047322	0.054749
OCF2CHF2	0.34	0.25	0.38	-0.13	0.019857	0.01762
SCF2CHF2	0.38	0.47	0.35	0.12	0.021829	0.025145
C2N8S2H	0.63	0.64	0.6	0.04	0.031666	0.027237
SC≡CH	0.26	0.19	0.3	-0.11	0.020283	0.022677
SCH=CHCl	0.31	0.24	0.34	-0.1	0.023062	0.024694
SeCH=CHCl	0.28	0.26	0.3	-0.04	0.021135	0.022266
CH2CF3	0.12	0.09	0.15	-0.06	0.009947	0.008868
CH2SOCF3	0.25	0.24	0.27	-0.03	0.016623	0.016141
CH2SO2CF3	0.29	0.31	0.29	0.02	0.019207	0.019482
CH2SCF3	0.12	0.15	0.13	0.02	0.015339	0.014134
CH2CN	0.16	0.18	0.17	0.01	0.016703	0.014413
NHCOCH2Cl	0.17	-0.03	0.27	-0.3	0.011754	0.006123
N(Me)SO2CF3	0.46	0.44	0.46	-0.02	0.026677	0.025948
C(Me)(NO2)2	0.54	0.61	0.5	0.11	0.031348	0.034048
oxiranyl	0.05	0.03	0.09	-0.06	0.005449	0.004194
OCH=CH2	0.21	-0.09	0.34	-0.43	0.009252	0.001125
SCOMe	0.39	0.44	0.37	0.07	0.010963	0.013296
2-thiacylopropyl	0.04	0.01	0.08	-0.07	0.005834	0.004079
SCH=CH2	0.26	0.2	0.29	-0.09	0.01737	0.019305
SeCH=CH2	0.26	0.21	0.29	-0.08	0.015664	0.017204
1-aziridinyl	-0.07	-0.22	0.03	-0.25	0.001195	-0.002156
2-aziridinyl	-0.06	-0.1	-0.01	-0.09	0.007079	0.003775
N-methyl-3-oxaziridinyl	0.09	0.12	0.1	0.02	0.007142	0.008533
NHCOOMe	-0.02	-0.17	0.07	-0.24	0.003526	-0.002586
CONHMe	0.35	0.36	0.35	0.01	0.013251	0.015825
CH=NOMe	0.37	0.3	0.4	-0.1	0.009525	0.011135
CH2CONH2	0.06	0.07	0.08	-0.01	0.020076	0.017999
NHCSMe	0.24	0.12	0.3	-0.18	0.012086	0.009859
CSNHMe	0.3	0.34	0.29	0.05	0.020257	0.022831
CH=NNHCONHNH2	0.22	0.16	0.26	-0.1	6e-05	0.002565
CH(OH)Me	0.08	-0.07	0.16	-0.23	-0.004031	-0.00496
CH2OMe	0.08	0.01	0.13	-0.12	-0.001304	-0.000651
SO2Et	0.66	0.77	0.59	0.18	0.034927	0.039298
SEt	0.18	0.03	0.26	-0.23	0.004351	-0.000362
P(Cl)NMe2	0.38	0.56	0.31	0.25	0.012038	0.013525
SiClMe2	0.16	0.21	0.16	0.05	0.007962	0.01051
SiFMe2	0.12	0.17	0.12	0.05	0.005883	0.008877
NHEt	-0.24	-0.61	-0.04	-0.57	-0.012189	-0.02426
N(Me)SO2Me	0.21	0.24	0.21	0.03	0.010959	0.006197
SO2NMe2	0.51	0.65	0.44	0.21	0.034694	0.038356
N(SO2Me)2	0.47	0.49	0.45	0.04	0.029511	0.03033
SN(Me)2	0.12	0.09	0.15	-0.06	0.000402	-0.004504
N=NNMe2	-0.05	-0.03	-0.02	-0.01	-0.012514	-0.01482
P(O)Me2	0.43	0.5	0.4	0.1	0.017147	0.019618
PO(OMe)2	0.42	0.53	0.37	0.16	0.013747	0.01937
PMe2	0.03	0.06	0.05	0.01	0.001985	0.000757
SiH(Me)2	0.01	0.04	0.03	0.01	0.000486	0.002272
CCCF3	0.41	0.51	0.37	0.14	0.029702	0.032394
CF=CFCF3	0.39	0.46	0.36	0.1	0.027753	0.030113
N=C(CF3)2	0.29	0.23	0.32	-0.09	0.024485	0.02162
CF2CF2CF3	0.44	0.48	0.42	0.06	0.028306	0.030604
CF(CF3)2	0.37	0.53	0.31	0.22	0.02821	0.029358
SO2CF2CF2CF3	0.92	1.09	0.81	0.28	0.052512	0.059989
SO2CF(CF3)2	0.92	1.1	0.8	0.3	0.053706	0.061033
SCF2CF2CF3	0.45	0.48	0.43	0.05	0.027923	0.031157
SCF(CF3)2	0.48	0.51	0.46	0.03	0.028869	0.031693
C(OH)(CF3)2	0.29	0.3	0.29	0.01	0.027224	0.027693
CH(SCF3)2	0.44	0.44	0.43	0.01	0.028994	0.028124
CH(CN)2	0.53	0.52	0.52	0	0.034369	0.032657
CH=CHCF3-c	0.16	0.17	0.18	-0.01	0.014807	0.01768
CH=CHCF3-t	0.24	0.27	0.24	0.03	0.019737	0.02041
CCMe	0.21	0.03	0.29	-0.26	0.004438	0.005653
N(Me)COCF3	0.41	0.39	0.41	-0.02	0.019231	0.017641
cyclopropyl	-0.07	-0.21	0.02	-0.23	-0.004277	-0.007923
C(Me)=CH2	0.09	0.05	0.13	-0.08	0.000904	0.00044
CH=CHMe	0.02	-0.09	0.09	-0.18	-0.00222	-0.003622
CH2CH=CH2	-0.11	-0.14	-0.06	-0.08	-9.4e-05	-0.002357
C(Et)(NO2)2	0.56	0.64	0.51	0.13	0.030899	0.032885
OCH2CH=CH2	0.09	-0.25	0.25	-0.5	0.002519	-0.006206
COEt	0.38	0.48	0.34	0.14	0.018842	0.024177
COOEt	0.37	0.45	0.34	0.11	0.014912	0.020571
CH2OCOMe	0.04	0.05	0.07	-0.02	0.009409	0.00966
CH2CH2COOH	-0.03	-0.07	0.02	-0.09	0.004693	0.001883
SCH2CH=CH2	0.19	0.12	0.23	-0.11	0.006574	0.001429
SeCH2CH=CH2	0.21	0.12	0.26	-0.14	0.007383	0.00337
CH2NHCOMe	0.05	-0.05	0.12	-0.17	0.014979	0.012909
NHCOOEt	0.11	-0.15	0.23	-0.38	0.002655	-0.003376
C(NO2)Me2	0.18	0.2	0.19	0.01	0.014842	0.013725
isopropyl	-0.04	-0.15	0.04	-0.19	-0.00399	-0.006574
Pr	-0.06	-0.13	0.01	-0.14	-0.004054	-0.006558
NHCONHEt	0.04	-0.26	0.19	-0.45	-0.004529	-0.010366
NHCSNHEt	0.3	0.07	0.4	-0.33	0.000492	-0.002684
OCHMe2	0.1	-0.45	0.34	-0.79	-0.00161	-0.010413
OPr	0.1	-0.25	0.26	-0.51	-0.00079	-0.009465
CH2CH(OH)Me	-0.12	-0.17	-0.06	-0.11	-0.009859	-0.011076
C(OOH)Me2	0.06	-0.14	0.17	-0.31	0.001639	0.00171
SCHMe2	0.23	0.07	0.3	-0.23	0.004104	-0.000277
CH2NMe2	0	0.01	0.03	-0.02	-0.002077	-0.002757
GeMe3	0	0	0.03	-0.03	-0.003049	-0.002551
Si(Me)2OMe	0.04	-0.02	0.09	-0.11	-0.00292	0.000249
OSiMe3	0.13	-0.27	0.31	-0.58	0.001895	-0.003859
SiMe(OMe)2	0.04	0.1	0.05	0.05	-0.005906	-0.00163
Si(OMe)3	0.09	0.13	0.1	0.03	0.004213	0.008667
SiMe3	-0.04	-0.07	0.01	-0.08	-0.002473	-0.001048
cyclo-C4F7	0.48	0.53	0.45	0.08	0.025312	0.025608
COCF2CF2CF3	0.63	0.79	0.55	0.24	0.036937	0.044823
C(CF3)3	0.55	0.55	0.53	0.02	0.028052	0.029971
(CF2)3CF3	0.47	0.52	0.44	0.08	0.02859	0.030957
SO2C(CF3)3	0.96	1.13	0.84	0.29	0.053172	0.061273
SC(CF3)3	0.51	0.58	0.47	0.11	0.029355	0.033406
C(SCF3)3	0.51	0.53	0.49	0.04	0.033689	0.034801
SeC(CF3)3	0.49	0.54	0.46	0.08	0.027951	0.031019
C(CN)3	0.97	0.96	0.92	0.04	0.062474	0.063612
cyclo-1-(OH)C4F6	0.36	0.37	0.36	0.01	0.014327	0.015207
CH=C(CN)2	0.66	0.84	0.57	0.27	0.044283	0.049913
2-(5-bromofuryl)	0.15	0	0.23	-0.23	0.008747	0.007611
1-pyrroline-2,5-dione	0.305	0.244	0.317	-0.073	0.00367	0.001767
3-chloro-1-pyrrolidine-2,5-dione	0.387	0.359	0.387	-0.028	0.016459	0.016486
3-pyridazinyl	0.28	0.48	0.21	0.27	0.008453	0.009772
C(Me)(CN)2	0.6	0.57	0.59	-0.02	0.045177	0.049871
2-furyl	0.06	0.02	0.1	-0.08	0.003049	0.002014
2-thienyl	0.09	0.05	0.13	-0.08	0.005403	0.0042
3-thienyl	0.03	-0.02	0.08	-0.1	0.00355	0.002112
2-selenienyl	0.06	0.04	0.1	-0.06	0.00498	0.003573
1-pyrryl	0.47	0.37	0.5	-0.13	0.012661	0.006401
1-pyrrolidine-2,5-dione	0.298	0.257	0.303	-0.046	0.008693	0.008992
cyclobutyl	-0.05	-0.14	0.02	-0.16	-0.004148	-0.006753
COCHMe2	0.38	0.47	0.35	0.12	0.016601	0.021049
NHCOCH(Me)2	0.11	-0.1	0.21	-0.31	0.004571	-0.000464
CMe3	-0.1	-0.2	-0.02	-0.18	-0.004917	-0.007262
CH(Me)Et	-0.08	-0.12	-0.02	-0.1	-0.004365	-0.006954
CH2CH(Me)2	-0.07	-0.12	-0.01	-0.11	-0.003387	-0.005859
n-Bu	-0.08	-0.16	-0.01	-0.15	-0.004237	-0.006783
On-Bu	0.1	-0.32	0.29	-0.61	-0.000844	-0.009515
CH2C(OH)Me2	-0.16	-0.17	-0.11	-0.06	-0.006031	-0.007742
C(OMe)3	-0.03	-0.04	0.01	-0.05	0.005308	0.00694
AsEt2	0.22	0	0.32	-0.32	0.002382	0.002716
As(O)Et2	0.57	0.44	0.6	-0.16	0.018823	0.020234
As(S)Et2	0.52	0.44	0.54	-0.1	0.021658	0.022575
NH(CH2)3CH3	-0.34	-0.51	-0.21	-0.3	-0.012467	-0.024547
NEt2	-0.23	-0.6	-0.1	-0.5	-0.013726	-0.025179
PO(Et)2	0.37	0.47	0.33	0.14	0.016259	0.018619
N=NPO(OEt)2	0.16	0.74	-0.05	0.79	0.026403	0.032706
P(Et)2	0.1	0.13	0.11	0.02	0.001577	0.000456
P(S)Et2	0.39	0.46	0.36	0.1	0.019404	0.021443
CH2OSi(Me)3	-0.04	-0.05	0	-0.05	-0.001701	-0.004357
CH2Si(Me)3	-0.16	-0.21	-0.09	-0.12	-0.005933	-0.010183
PO(NMe2)2	0.3	0.4	0.27	0.13	0.010946	0.015387
P(NMe2)2	0.18	0.25	0.17	0.08	0.000522	0.002858
C(CN)=C(CN)2	0.77	0.98	0.65	0.33	0.05338	0.057608
2-(5-cyanofuryl)	0.25	0.1	0.32	-0.22	0.021263	0.021022
3-pyridyl	0.23	0.25	0.24	0.01	0.01046	0.009378
4-pyridyl	0.27	0.44	0.21	0.23	0.015189	0.014771
2-(4,6-dimethyl-s-triazinyl)	0.25	0.39	0.21	0.18	0.007973	0.013243
1-cyclopentenyl	-0.06	-0.05	-0.03	-0.02	-0.002209	-0.003192
cyclopentyl	-0.05	-0.14	0.02	-0.16	-0.005333	-0.00747
COCMe3	0.27	0.32	0.26	0.06	0.01517	0.019057
NHCO2n-Bu	0.06	-0.05	0.13	-0.18	0.003104	-0.00241
CEt(Me)2	-0.06	-0.18	0.03	-0.21	-0.005463	-0.00782
CH2C(Me)3	-0.05	-0.17	0.03	-0.14	-0.003614	-0.005668
(CH2)4CH3	-0.08	-0.15	-0.01	-0.14	-0.004254	-0.006793
O(CH2)4CH3	0.1	-0.34	0.29	-0.63	0.004214	0.000289
CH2PO(OEt)2	0.12	0.06	0.17	-0.11	0.006802	0.006424
CH2CH2SiMe3	-0.16	-0.17	-0.11	-0.06	-0.00487	-0.007614
Si(Me)2OSiMe3	0	-0.01	0.04	-0.05	-0.004198	-0.001922
C6Cl5	0.25	0.24	0.27	-0.03	0.017219	0.016778
C6F5	0.26	0.27	0.27	0	0.018212	0.018532
P(O)(C3F7)2	0.95	1.1	0.84	0.26	0.047279	0.053292
OP(O)(C3F7)2	0.66	0.56	0.67	-0.11	0.032535	0.028186
NHP(O)(C3F7)2	0.28	0.18	0.33	-0.15	0.023674	0.016476
CH2Mn(CO)5	-0.14	-0.44	0.02	-0.46	-0.004747	-0.011368
C6H2-2,4,6-(NO2)3	0.26	0.3	0.26	0.04	0.026758	0.026223
C6H4-3-Br	0.09	0.08	0.12	-0.04	0.009476	0.00855
C6H4-4-Br	0.15	0.12	0.18	-0.06	0.009716	0.008488
C6H4-3-Cl	0.15	0.1	0.19	-0.09	0.00919	0.008255
C6H4-4-Cl	0.15	0.12	0.18	-0.06	0.009287	0.008037
C6H4-3-F	0.15	0.1	0.19	-0.09	0.008144	0.007268
C6H4-4-F	0.12	0.06	0.17	-0.11	0.006998	0.005567
OC6H4-4-F	-0.08	-0.1	-0.03	-0.07	0.012757	0.008682
C6H4-3-NO2	0.21	0.2	0.23	-0.03	0.017299	0.015889
C6H4-4-NO2	0.25	0.26	0.26	0	0.022687	0.021811
SC6H4-4-NO2	0.32	0.24	0.36	-0.12	0.024237	0.024907
SOC6H4-4-NO2	0.58	0.6	0.55	0.05	0.039273	0.040371
2-benzotriazolyl	0.49	0.51	0.47	0.04	0.021368	0.022451
N(O)=NSO2Ph	0.69	0.79	0.62	0.17	0.0463	0.051345
N=NPh	0.32	0.39	0.3	0.09	0.011283	0.014734
OPh	0.25	-0.03	0.37	-0.4	0.008598	0.004972
SOPh	0.5	0.44	0.51	-0.07	0.021265	0.021698
2-(5-acetylfuryl)	0.24	0.08	0.31	-0.23	0.019778	0.019441
2-(6-methylpyronyl)	0.38	0.43	0.36	0.07	0.024978	0.026291
SO2Ph	0.62	0.68	0.5	0.1	0.031287	0.035796
OSO2Ph	0.36	0.33	0.37	-0.04	0.013805	0.012764
SPh	0.23	0.07	0.3	-0.23	0.01035	0.012085
NHPh	-0.02	-0.56	0.22	-0.78	-0.000428	-0.009909
NHSO2Ph	0.33	0.03	0.43	-0.4	0.016888	0.010893
SO2NHPh	0.56	0.65	0.51	0.14	0.034354	0.038872
2-(5-ethylfuryl)	0.09	-0.13	0.2	-0.33	-2.9e-05	-0.001369
1-(2,5-dimethylpyrryl)	0.49	0.38	0.52	-0.14	0.017044	0.015426
1-cyclohexenyl	-0.1	-0.08	-0.07	-0.01	-0.00357	-0.004919
cyclohexyl	-0.05	-0.15	0.03	-0.18	-0.004936	-0.007357
N(n-Pr)2	-0.26	-0.6	-0.14	-0.46	-0.013097	-0.022894
(CH2)4NMe2	-0.08	-0.16	-0.01	-0.15	-0.004345	-0.007225
PO(i-Pr)2	0.37	0.41	0.36	0.05	0.016322	0.0188
P(i-Pr)2	0.02	0.06	0.04	0.02	0.001474	5.1e-05
P(O)(OPr)2	0.38	0.5	0.33	0.17	0.011671	0.01746
Ge(Et)3	0	0	0.03	-0.03	-0.003837	-0.003422
Si(OEt)3	0.02	0.08	0.03	0.05	-0.008251	-0.003167
P(=NSO2CF3)(C3F7)2	1.24	1.37	1.11	0.26	0.06439	0.070385
Si(NMe2)3	-0.04	-0.04	0	-0.04	-0.007428	-0.004509
2-benzoxazolyl	0.3	0.33	0.3	0.04	0.014456	0.016243
2-benzthiazolyl	0.27	0.29	0.27	0.02	0.011747	0.012967
COPh	0.34	0.43	0.31	0.12	0.014632	0.020676
OCOPh	0.21	0.13	0.26	-0.13	0.009619	0.006615
COOPh	0.37	0.44	0.34	0.1	0.01966	0.025732
CH=NPh	0.35	0.42	0.33	0.09	0.01041	0.013532
NHCOPh	0.02	-0.19	0.13	-0.32	0.004751	0.000488
CONHPh	0.23	0.41	0.17	0.24	0.019837	0.022523
C6H4-4-Me	0.06	-0.03	0.12	-0.15	-1e-05	-0.000972
CH2Ph	-0.08	-0.09	-0.04	-0.05	-0.001736	-0.004131
N=NPh-5-Me-2-OH	0.27	0.31	0.26	0.05	0.015567	0.017976
C6H4-4-OMe	0.05	-0.08	0.13	-0.21	-0.000745	-0.002087
CH(OH)Ph	0	-0.03	0.05	-0.08	0.005862	0.004428
CH2OPh	0.06	0.07	0.08	-0.01	0.004656	0.005089
CH2SO2Ph	0.15	0.16	0.17	-0.01	0.002124	0.003139
C(Et)3	-0.07	-0.2	0.02	-0.22	-0.006395	-0.008935
(CH2)6CH3	-0.07	-0.16	0	-0.16	-0.0043	-0.006813
SiMe(OSi(Me)3)2	-0.02	-0.01	0.01	-0.02	0.001034	0.003265
CF2CF2C6H4-4-F	0.34	0.39	0.32	0.07	0.017352	0.019926
C≡CPh	0.14	0.16	0.15	0.01	0.009462	0.011129
CH=NCOPh	0.39	0.51	0.34	0.17	0.023645	0.028629
CH=CHPh	0.03	-0.07	0.1	-0.17	0.00296	0.002218
CH2Fe(CO)2(pi-C5H5)	-0.26	-0.49	-0.11	-0.38	-0.007212	-0.011884
CH=NNHCOPh	0.39	0.51	0.34	0.17	0.011348	0.013337
NHCOC6H4-4-OMe	0.09	-0.06	0.17	-0.23	0.001783	-0.0025
SCH=NSO2C6H4-4-Me	0.65	0.7	0.61	0.09	0.037266	0.036433
C6H4-4-Et	0.07	-0.02	0.13	-0.15	5.1e-05	-0.000887
CH2CH2Ph	-0.07	-0.12	-0.01	-0.11	-0.000541	-0.003122
SiPhMe2	0.04	0.07	0.06	0.01	0.00094	0.003005
S(Me)=NSO2C6H4-4-Me	0.65	0.7	0.61	0.09	0.041106	0.043299
PO(t-Bu)2	0.31	0.41	0.28	0.13	0.013006	0.016131
PO(n-Bu)2	0.35	0.49	0.3	0.19	0.015439	0.017818
PO(On-Bu)2	0.41	0.57	0.35	0.22	0.011534	0.017389
P(t-Bu)2	0.01	0.15	-0.01	0.16	0.003467	0.005513
C6H5Cr(CO)3	0.29	0.14	0.36	-0.22	0.015143	0.013645
2-benzo-4-thiopyronyl	0.34	0.35	0.34	0.01	0.028051	0.030229
2-benzothiopyronyl	0.48	0.45	0.48	-0.03	0.023905	0.025022
2-(benzo-1,4-pyronyl)	0.41	0.4	0.41	-0.01	0.025152	0.027097
C6H4-4-CHMe2	0.08	0.01	0.13	-0.12	5.6e-05	-0.000902
Si(OSiMe3)3	-0.09	-0.01	-0.08	0.07	-0.003164	0.00057
ferrocenyl	-0.15	-0.18	-0.09	-0.09	0.000982	-0.000902
C6H4-4-CMe3	0.07	0.01	0.12	-0.11	0.000114	-0.00076
1-dibenzarsenyl	0.19	0.13	0.23	-0.1	0.003982	0.005575
1-dibenzoarsoxyl	0.17	0.09	0.22	-0.13	0.01863	0.021522
1-dibenzoarsazinyl	0.14	0.09	0.18	-0.09	0.001922	0.003789
AsPh2	0.03	0.09	0.04	0.05	0.004903	0.005789
AsOPh2	0.54	0.64	0.49	0.15	0.018747	0.021339
PPh2BCl3	0.67	0.72	0.62	0.1	0.029895	0.033924
NPh2	0	-0.22	0.12	-0.34	0.00317	-0.001943
POPh2	0.38	0.53	0.32	0.21	0.014895	0.018891
PPh2	0.11	0.19	0.1	0.09	0.006194	0.007954
PSPh2	0.29	0.47	0.23	0.24	0.017874	0.021516
P(NPr2)-C6H4-3-F	0.2	0.24	0.2	0.04	0.002198	0.001621
pyron-comp1	0.37	0.38	0.37	0.01	0.026099	0.027742
pyron-comp2	0.38	0.38	0.38	0	0.024145	0.025845
imidazole-comp1	0.17	0.21	0.17	0.04	0.008725	0.011285
CHPh2	-0.03	-0.05	0.01	-0.06	0.000333	-0.000928
As-comp1	0.12	0.07	0.16	-0.09	-0.003198	-0.003358
POPh(Ph-4-Me)	0.13	0.3	0.09	0.21	0.013412	0.017676
CH2POPh2	0.14	0.01	0.21	-0.2	-0.004423	-0.004551
PS(Ph)(Ph-4-Me)	0.09	0.3	0.03	0.27	0.017371	0.021339
Si(Me)Ph2	0.1	0.13	0.11	0.02	-0.000965	0.001991
COOCHPh2	0.36	0.56	0.28	0.28	0.017144	0.023019
PO(Ph-4-Me)2	0.17	0.3	0.14	0.16	0.011374	0.015556
PS(Ph-4-Me)2	0.2	0.23	0.2	0.03	0.0146	0.018455
GePh3	0.05	0.08	0.07	0.01	0.000994	0.002938
N=PPh3	-0.33	-0.77	-0.1	-0.67	-0.032062	-0.039532
SiPh3	-0.03	0.1	-0.04	0.14	0.000488	0.003737
CPh3	-0.01	0.02	0.01	0.01	-0.000757	-0.001651
1-(1,2(BH)10-C2H)	0.49	0.43	0.5	-0.07	0.031527	0.029435
1-(1,7(BH)10-C2H)	0.25	0.33	0.23	0.1	0.016708	0.01611
2-(1,7(BH)10-C2H)	0.14	0.15	0.16	-0.01	0.013804	0.012617
4-(1,7(BH)10-C2H)	-0.02	0.02	0	0.02	0.000805	0.001786
3-(1,2(BH)10-C2H)	0.2	0.19	0.22	-0.03	0.015209	0.015146
1-(1,2(BH)10-C2Me)	0.5	0.65	0.43	0.22	0.031639	0.031854
CH2-1-(1,2(BH)10-C2H)	0.12	0.12	0.14	-0.02	0.013248	0.010813
CH2-1-(1,7(BH)10-C2H)	0	0.01	0.03	-0.02	0.00406	0.002228
2-(methylcarbonyl)carboran-1-yl	0.4	0.63	0.31	0.32	0.019375	0.020141
2-((carbonyloxy)methyl)carboran-1-yl	0.7	0.74	0.66	0.08	0.036622	0.038171
CH2-1-(1,2(BH)10-C2Me)	0.1	0.11	0.12	-0.01	0.011995	0.009609
1-adamantyl	-0.12	-0.13	-0.07	-0.06	-0.006644	-0.008697

[truncated: 8 more sheets: MN15_LanL2DZ_SMD, MN15_aug-cc-pVTZ_SMD, CAM-B3LYP_6-311++g(d,p)_SMD, ωB97XD_6-311++g(d,p)_SMD, PBE_6-311++g(d,p)_SMD, PBE0_6-311++g(d,p)_SMD, B3LYP_Other_Charges, B3LYP_Gasteiger]
